# Supplementary material for: mGWAS-Explorer 2.0: Causal Analysis and Interpretation of Metabolite–Phenotype Associations
Source: MDPI journal article supplement (doi:10.3390/metabo13070826), 2023-07-05
Supplement: s1 [file s1]

(a)

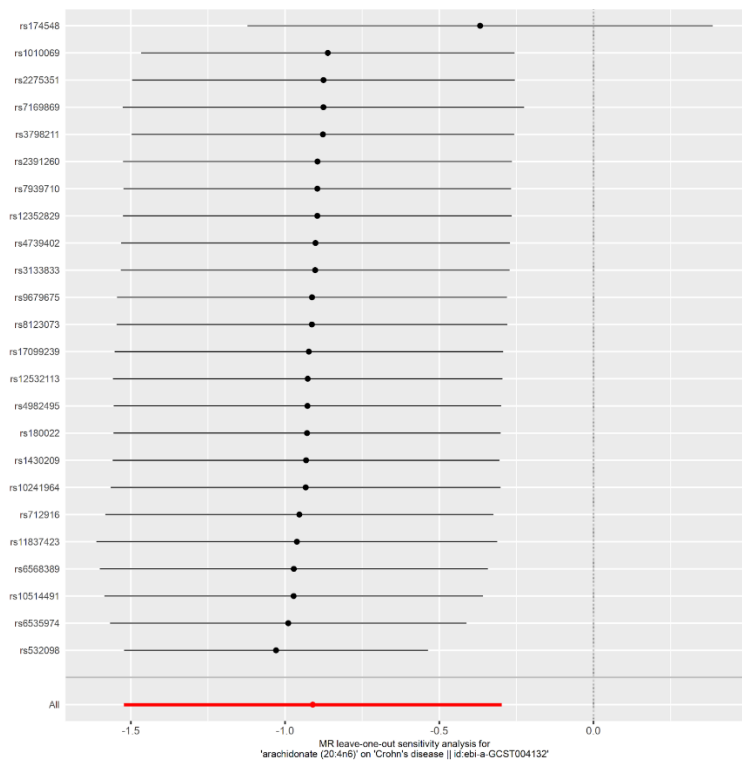

(b)

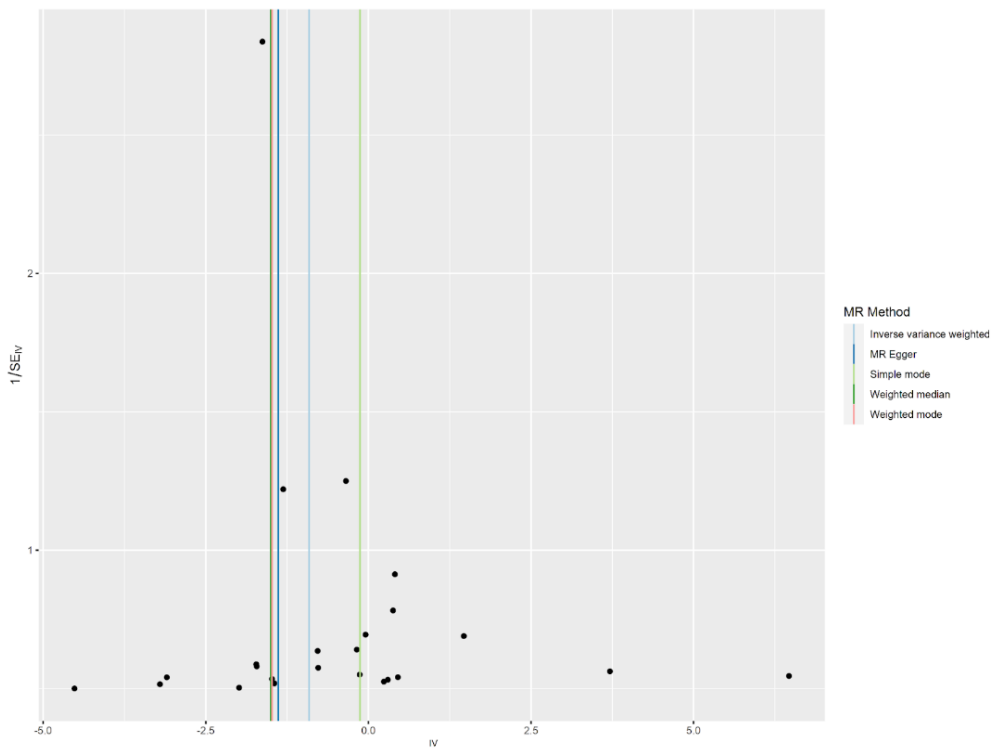

**Supplementary Figure S1.** Assessment of causal effects of arachidonic acid levels on Crohn's disease. (a) a leave-one-out plot, which determine whether a single SNP is having a disproportionately larger impact on an association; (b) a funnel plot, showing the relationships between the causal effect of arachidonic acids on Crohn's disease calculated using each individual SNP as a separate instrument against the inverse of the standard error of the causal estimate.
