# Supplementary material for: mGWAS-Explorer 2.0: Causal Analysis and Interpretation of Metabolite–Phenotype Associations
Source: Metabolites. 2023 Jul 5;13(7):826. doi: 10.3390/metabo13070826 (PMC10384390; doi:10.3390/metabo13070826)
Supplement: Supplementary file 1 [file metabolites-13-00826-s001.zip › supplementary_tables.xlsx]

## Sheet: Summary
Summary of supplementary tables
TableS1. Significant phenome-wide Mendelian randomization results

## Sheet: TableS1
id.exposure	id.outcome	outcome	exposure	method	nsnp	b	se	pval	z_statistic	outcome.nm
uza34B	ukb-b-13251	Non-cancer illness code, self-reported: gout || id:ukb-b-13251	3-bromo-5-chloro-2,6-dihydroxybenzoic acid*	Wald ratio	1	0.0364944	0.00107838	4.74927e-251	33.8421	Non-cancer illness code, self-reported: gout
x8lUQg	ukb-b-13251	Non-cancer illness code, self-reported: gout || id:ukb-b-13251	3,5-dichloro-2,6-dihydroxybenzoic acid	Wald ratio	1	0.0359712	0.00106356	9.54612e-251	33.8214	Non-cancer illness code, self-reported: gout
ck3qM1	ukb-b-13251	Non-cancer illness code, self-reported: gout || id:ukb-b-13251	urate	Wald ratio	1	0.189924	0.00842534	1.60919e-112	22.542	Non-cancer illness code, self-reported: gout
tmG8Pq	ieu-a-12	Crohn's disease || id:ieu-a-12	nervonoylcarnitine (c24:1)*	Inverse variance weighted	3	-1.23503	0.0549358	6.32677e-112	-22.4813	Crohn's disease
EnI8Rf	ieu-a-294	Inflammatory bowel disease || id:ieu-a-294	x-11381	Inverse variance weighted	3	-0.825106	0.0410967	1.1679e-89	-20.0772	Inflammatory bowel disease
tmG8Pq	ieu-a-294	Inflammatory bowel disease || id:ieu-a-294	nervonoylcarnitine (c24:1)*	Inverse variance weighted	3	-0.90932	0.0452912	1.1679e-89	-20.0772	Inflammatory bowel disease
EtaXQu	ukb-b-13251	Non-cancer illness code, self-reported: gout || id:ukb-b-13251	levulinoylcarnitine	Inverse variance weighted	5	0.0177388	0.00094414	9.41237e-79	18.7883	Non-cancer illness code, self-reported: gout
Ik0VgZ	ieu-a-12	Crohn's disease || id:ieu-a-12	margaroylcarnitine (c17)*	Inverse variance weighted	2	-1.49765	0.0840826	5.73795e-71	-17.8117	Crohn's disease
EnI8Rf	ukb-b-18113	Non-cancer illness code, self-reported: asthma || id:ukb-b-18113	x-11381	Inverse variance weighted	3	0.0478156	0.0027428	4.62519e-68	17.4331	Non-cancer illness code, self-reported: asthma
5WEKgE	ukb-b-18113	Non-cancer illness code, self-reported: asthma || id:ukb-b-18113	pc ae c36:3	Inverse variance weighted	8	-0.021023	0.00120984	1.24111e-67	-17.3766	Non-cancer illness code, self-reported: asthma
Ik0VgZ	ieu-a-89	Height || id:ieu-a-89	margaroylcarnitine (c17)*	Inverse variance weighted	2	-0.345447	0.0202393	2.56433e-65	-17.0681	Height
pCZJ7N	ieu-a-89	Height || id:ieu-a-89	linoleoylcarnitine (c18:2)*	Inverse variance weighted	2	-0.280027	0.0164065	2.56433e-65	-17.0681	Height
2ccX6r	ukb-b-13251	Non-cancer illness code, self-reported: gout || id:ukb-b-13251	x-24241	Inverse variance weighted	6	0.00573604	0.000345072	4.76895e-62	16.6228	Non-cancer illness code, self-reported: gout
LWKVFP	ieu-a-12	Crohn's disease || id:ieu-a-12	pc ae c34:2	Inverse variance weighted	5	0.60583	0.0380687	5.05839e-57	15.9141	Crohn's disease
Ik0VgZ	ieu-a-294	Inflammatory bowel disease || id:ieu-a-294	margaroylcarnitine (c17)*	Inverse variance weighted	2	-1.09912	0.0692202	8.90785e-57	-15.8786	Inflammatory bowel disease
pCZJ7N	ieu-a-294	Inflammatory bowel disease || id:ieu-a-294	linoleoylcarnitine (c18:2)*	Inverse variance weighted	2	-0.890974	0.0561114	8.90785e-57	-15.8786	Inflammatory bowel disease
2ccX6r	ieu-a-12	Crohn's disease || id:ieu-a-12	x-24241	Wald ratio	1	-1.72841	0.112231	1.62602e-53	-15.4004	Crohn's disease
zgfZ8s	ieu-a-12	Crohn's disease || id:ieu-a-12	histidine betaine (hercynine)*	Wald ratio	1	1.67362	0.109525	1.02758e-52	15.2807	Crohn's disease
S26sfX	ukb-b-18113	Non-cancer illness code, self-reported: asthma || id:ukb-b-18113	1-oleoyl-2-eicosapentaenoyl-gpc (18:1/20:5)	Inverse variance weighted	4	0.0200315	0.00134398	3.07633e-50	14.9046	Non-cancer illness code, self-reported: asthma
43IJl3	ukb-a-363	Pulse rate || id:ukb-a-363	stearidonate (18:4n3)	Inverse variance weighted	4	-0.272749	0.0183674	6.99524e-50	-14.8496	Pulse rate
wDMryM	ukb-a-363	Pulse rate || id:ukb-a-363	nisinate (24:6n3)	Inverse variance weighted	4	-0.212317	0.0142978	6.99524e-50	-14.8496	Pulse rate
cUjbYG	ieu-a-89	Height || id:ieu-a-89	octadecenoylcarnitine	Inverse variance weighted	2	-0.282187	0.0193301	2.87794e-48	-14.5983	Height
rzcVcK	ukb-a-363	Pulse rate || id:ukb-a-363	1-(1-enyl-stearoyl)-2-linoleoyl-gpe (p-18:0/18:2)*	Inverse variance weighted	7	0.177673	0.0122301	8.1125e-48	14.5275	Pulse rate
pCZJ7N	ukb-b-18113	Non-cancer illness code, self-reported: asthma || id:ukb-b-18113	linoleoylcarnitine (c18:2)*	Inverse variance weighted	2	0.0541502	0.00374454	2.13377e-47	14.4611	Non-cancer illness code, self-reported: asthma
2ccX6r	ieu-a-294	Inflammatory bowel disease || id:ieu-a-294	x-24241	Wald ratio	1	-1.27707	0.0928514	4.82534e-43	-13.7539	Inflammatory bowel disease
FYvImn	ukb-b-1668	Diagnoses - main ICD10: I25.1 Atherosclerotic heart disease || id:ukb-b-1668	serine	Inverse variance weighted	5	-0.0279495	0.00203363	5.56058e-43	-13.7436	Diagnoses - main ICD10: I25.1 Atherosclerotic heart disease
zgfZ8s	ieu-a-294	Inflammatory bowel disease || id:ieu-a-294	histidine betaine (hercynine)*	Wald ratio	1	1.24068	0.0904672	8.34828e-43	13.7142	Inflammatory bowel disease
S26sfX	ukb-a-363	Pulse rate || id:ukb-a-363	1-oleoyl-2-eicosapentaenoyl-gpc (18:1/20:5)	Inverse variance weighted	4	-0.115359	0.00861537	6.93002e-41	-13.3899	Pulse rate
APGVyT	ukb-b-18113	Non-cancer illness code, self-reported: asthma || id:ukb-b-18113	docosatrienoate (22:3n6)*	Inverse variance weighted	3	0.0276776	0.00206776	7.36878e-41	13.3853	Non-cancer illness code, self-reported: asthma
5WEKgE	ukb-b-19732	Non-cancer illness code, self-reported: hypothyroidism/myxoedema || id:ukb-b-19732	pc ae c36:3	Inverse variance weighted	8	-0.0108244	0.000809487	8.81994e-41	-13.3719	Non-cancer illness code, self-reported: hypothyroidism/myxoedema
ypYPNn	ukb-b-19732	Non-cancer illness code, self-reported: hypothyroidism/myxoedema || id:ukb-b-19732	pc aa c32:2	Inverse variance weighted	6	-0.0210886	0.00158283	1.69312e-40	-13.3234	Non-cancer illness code, self-reported: hypothyroidism/myxoedema
0Q9zX1	ukb-a-335	Sodium in urine || id:ukb-a-335	5-hydroxy-2-methylpyridine sulfate	Inverse variance weighted	3	-0.169326	0.012864	1.43706e-39	-13.1628	Sodium in urine
JDcypK	ukb-a-335	Sodium in urine || id:ukb-a-335	5-acetylamino-6-amino-3-methyluracil	Inverse variance weighted	3	-0.167018	0.0126887	1.43706e-39	-13.1628	Sodium in urine
5dzcey	ukb-b-1668	Diagnoses - main ICD10: I25.1 Atherosclerotic heart disease || id:ukb-b-1668	sm c24:0	Inverse variance weighted	5	0.0283293	0.00217185	6.89116e-39	13.0438	Diagnoses - main ICD10: I25.1 Atherosclerotic heart disease
Z2SbbQ	ukb-b-1668	Diagnoses - main ICD10: I25.1 Atherosclerotic heart disease || id:ukb-b-1668	sm (oh) c22:2	Inverse variance weighted	5	0.0290734	0.0022289	6.89116e-39	13.0438	Diagnoses - main ICD10: I25.1 Atherosclerotic heart disease
7byy5c	ieu-a-89	Height || id:ieu-a-89	isobutyrylcarnitine (c4)	Inverse variance weighted	6	-0.15315	0.0117527	8.1412e-39	-13.0311	Height
bl5GIW	ukb-b-18113	Non-cancer illness code, self-reported: asthma || id:ukb-b-18113	1-palmitoyl-2-eicosapentaenoyl-gpc (16:0/20:5)	Inverse variance weighted	3	0.0215943	0.00166005	1.09812e-38	13.0083	Non-cancer illness code, self-reported: asthma
IUlYa2	ukb-b-18113	Non-cancer illness code, self-reported: asthma || id:ukb-b-18113	1-eicosapentaenoyl-gpc (20:5)	Inverse variance weighted	3	0.0211297	0.00162433	1.09812e-38	13.0083	Non-cancer illness code, self-reported: asthma
Bm6jSv	ukb-b-18113	Non-cancer illness code, self-reported: asthma || id:ukb-b-18113	1-dihomo-linolenoyl-gpe (20:3n3 or 6)	Inverse variance weighted	3	-0.016672	0.00128165	1.09812e-38	-13.0083	Non-cancer illness code, self-reported: asthma
EtaXQu	ieu-a-89	Height || id:ieu-a-89	levulinoylcarnitine	Inverse variance weighted	5	-0.160447	0.0123939	2.48628e-38	-12.9457	Height
LWKVFP	ieu-a-294	Inflammatory bowel disease || id:ieu-a-294	pc ae c34:2	Inverse variance weighted	5	0.408756	0.0316423	3.56152e-38	12.918	Inflammatory bowel disease
ypYPNn	ieu-a-294	Inflammatory bowel disease || id:ieu-a-294	pc aa c32:2	Inverse variance weighted	5	0.463865	0.0359084	3.56152e-38	12.918	Inflammatory bowel disease
wIwobu	ieu-a-12	Crohn's disease || id:ieu-a-12	arachidoylcarnitine (c20)*	Wald ratio	1	-1.20557	0.0951871	9.20488e-37	-12.6653	Crohn's disease
s8Qswk	ukb-a-25	Alcohol intake frequency. || id:ukb-a-25	pc ae c38:1	Wald ratio	1	0.479874	0.037963	1.26137e-36	12.6406	Alcohol intake frequency.
APGVyT	ieu-a-12	Crohn's disease || id:ieu-a-12	docosatrienoate (22:3n6)*	Inverse variance weighted	3	-0.462344	0.0370688	1.05347e-35	-12.4726	Crohn's disease
XjZgRS	ukb-a-336	Forced vital capacity (FVC) || id:ukb-a-336	carboxyethyl-gaba	Inverse variance weighted	4	0.0919346	0.00738939	1.55662e-35	12.4414	Forced vital capacity (FVC)
s8Qswk	ukb-b-13251	Non-cancer illness code, self-reported: gout || id:ukb-b-13251	pc ae c38:1	Wald ratio	1	0.0321623	0.00260245	4.38429e-35	12.3585	Non-cancer illness code, self-reported: gout
hfQrfn	ukb-b-13745	Irritability || id:ukb-b-13745	pc ae c38:2	Inverse variance weighted	8	0.0288117	0.00235676	2.28168e-34	12.2251	Irritability
LWKVFP	ieu-a-1008	Platelet count || id:ieu-a-1008	pc ae c34:2	Inverse variance weighted	5	15.4453	1.27211	6.36674e-34	12.1415	Platelet count
LnxdHc	ieu-a-89	Height || id:ieu-a-89	3-hydroxyoleoylcarnitine	Wald ratio	1	-0.302112	0.025176	3.55296e-33	-12	Height
ypYPNn	ieu-a-1008	Platelet count || id:ieu-a-1008	pc aa c32:2	Inverse variance weighted	6	16.9921	1.42312	7.31638e-33	11.9401	Platelet count
S26sfX	ieu-a-294	Inflammatory bowel disease || id:ieu-a-294	1-oleoyl-2-eicosapentaenoyl-gpc (18:1/20:5)	Inverse variance weighted	4	-0.232305	0.0195418	1.3726e-32	-11.8876	Inflammatory bowel disease
TWxt25	ukb-b-19732	Non-cancer illness code, self-reported: hypothyroidism/myxoedema || id:ukb-b-19732	1,2-dipalmitoyl-gpc (16:0/16:0)	Wald ratio	1	0.0363691	0.00307353	2.63505e-32	11.833	Non-cancer illness code, self-reported: hypothyroidism/myxoedema
5dzcey	ukb-b-14177	Vascular/heart problems diagnosed by doctor: High blood pressure || id:ukb-b-14177	sm c24:0	Inverse variance weighted	5	0.0704186	0.0059806	5.28255e-32	11.7745	Vascular/heart problems diagnosed by doctor: High blood pressure
64eMOw	ukb-b-14177	Vascular/heart problems diagnosed by doctor: High blood pressure || id:ukb-b-14177	sm (oh) c22:1	Inverse variance weighted	5	0.0667574	0.00566965	5.28255e-32	11.7745	Vascular/heart problems diagnosed by doctor: High blood pressure
wIwobu	ieu-a-294	Inflammatory bowel disease || id:ieu-a-294	arachidoylcarnitine (c20)*	Wald ratio	1	-0.918925	0.0783171	8.59341e-32	-11.7334	Inflammatory bowel disease
w2lc9q	ieu-a-89	Height || id:ieu-a-89	acetylcarnitine (c2)	Wald ratio	1	-0.298635	0.0255973	1.88672e-31	-11.6667	Height
rHGF9e	ieu-a-89	Height || id:ieu-a-89	ergothioneine	Wald ratio	1	0.23576	0.020208	1.88672e-31	11.6667	Height
wDMryM	ieu-a-294	Inflammatory bowel disease || id:ieu-a-294	nisinate (24:6n3)	Inverse variance weighted	4	-0.385606	0.0333513	6.42359e-31	-11.5619	Inflammatory bowel disease
bl5GIW	ukb-a-363	Pulse rate || id:ukb-a-363	1-palmitoyl-2-eicosapentaenoyl-gpc (16:0/20:5)	Inverse variance weighted	3	-0.122971	0.0106424	6.97975e-31	-11.5548	Pulse rate
Bm6jSv	ukb-a-363	Pulse rate || id:ukb-a-363	1-dihomo-linolenoyl-gpe (20:3n3 or 6)	Inverse variance weighted	3	0.0949405	0.00821653	6.97975e-31	11.5548	Pulse rate
BucRJO	ukb-b-13251	Non-cancer illness code, self-reported: gout || id:ukb-b-13251	sphingomyelin (d17:1/16:0, d18:1/15:0, d16:1/17:0)*	Inverse variance weighted	2	-0.0212619	0.00184722	1.17145e-30	-11.5102	Non-cancer illness code, self-reported: gout
nF5414	ukb-b-14177	Vascular/heart problems diagnosed by doctor: High blood pressure || id:ukb-b-14177	cysteinylglycine disulfide*	Inverse variance weighted	3	0.0209058	0.00182412	2.07683e-30	11.4608	Vascular/heart problems diagnosed by doctor: High blood pressure
TVHd6X	ukb-b-14177	Vascular/heart problems diagnosed by doctor: High blood pressure || id:ukb-b-14177	cys-gly, oxidized	Inverse variance weighted	3	0.0155226	0.00135441	2.07683e-30	11.4608	Vascular/heart problems diagnosed by doctor: High blood pressure
wkLuzs	ukb-b-1668	Diagnoses - main ICD10: I25.1 Atherosclerotic heart disease || id:ukb-b-1668	behenoyl dihydrosphingomyelin (d18:0/22:0)*	Inverse variance weighted	5	0.0146679	0.00128125	2.404e-30	11.4481	Diagnoses - main ICD10: I25.1 Atherosclerotic heart disease
CdXLbW	ieu-a-89	Height || id:ieu-a-89	homostachydrine*	Wald ratio	1	-0.181291	0.0159962	8.97239e-30	-11.3333	Height
dTGzGo	ukb-a-336	Forced vital capacity (FVC) || id:ukb-a-336	(n(1) + n(8))-acetylspermidine	Inverse variance weighted	5	-0.0483979	0.00437991	2.19299e-28	-11.05	Forced vital capacity (FVC)
ypYPNn	ukb-b-13745	Irritability || id:ukb-b-13745	pc aa c32:2	Inverse variance weighted	6	0.0391114	0.00354275	2.4548e-28	11.0398	Irritability
ev60og	ukb-b-18113	Non-cancer illness code, self-reported: asthma || id:ukb-b-18113	1-palmitoleoyl-2-linoleoyl-gpc (16:1/18:2)	Inverse variance weighted	2	-0.0173324	0.0015812	5.8476e-28	-10.9616	Non-cancer illness code, self-reported: asthma
QuN3EB	ukb-b-18113	Non-cancer illness code, self-reported: asthma || id:ukb-b-18113	2-linoleoyl-gpe (18:2)	Inverse variance weighted	2	-0.0193601	0.00176618	5.8476e-28	-10.9616	Non-cancer illness code, self-reported: asthma
G3p6NL	ukb-b-18113	Non-cancer illness code, self-reported: asthma || id:ukb-b-18113	x-24278	Inverse variance weighted	2	0.0153799	0.00140579	7.38681e-28	10.9404	Non-cancer illness code, self-reported: asthma
czPzMj	ieu-a-270	Haemoglobin concentration || id:ieu-a-270	thioproline	Wald ratio	1	-0.735825	0.0673717	9.06057e-28	-10.9219	Haemoglobin concentration
DaRI8K	ukb-b-18113	Non-cancer illness code, self-reported: asthma || id:ukb-b-18113	hydroxypalmitoyl sphingomyelin (d18:1/16:0(oh))**	Inverse variance weighted	2	-0.0190275	0.00175093	1.65388e-27	-10.8671	Non-cancer illness code, self-reported: asthma
wkLuzs	ieu-a-7	Coronary heart disease || id:ieu-a-7	behenoyl dihydrosphingomyelin (d18:0/22:0)*	Inverse variance weighted	5	0.383955	0.035465	2.58372e-27	10.8263	Coronary heart disease
nbhiB0	ukb-a-359	Diastolic blood pressure automated reading || id:ukb-a-359	n-acetyl-1-methylhistidine*	Inverse variance weighted	8	0.0150919	0.00139876	3.86019e-27	10.7895	Diastolic blood pressure automated reading
TWxt25	ieu-a-970	Ulcerative colitis || id:ieu-a-970	1,2-dipalmitoyl-gpc (16:0/16:0)	Wald ratio	1	-0.939591	0.0873255	5.33808e-27	-10.7596	Ulcerative colitis
LWKVFP	ukb-a-500	Heel bone mineral density (BMD) T-score automated || id:ukb-a-500	pc ae c34:2	Inverse variance weighted	7	0.100172	0.00933507	7.30445e-27	10.7307	Heel bone mineral density (BMD) T-score automated
dVokOy	ukb-a-359	Diastolic blood pressure automated reading || id:ukb-a-359	n-acetylcitrulline	Inverse variance weighted	5	0.013953	0.00130572	1.183e-26	10.6861	Diastolic blood pressure automated reading
hd47cc	ukb-a-359	Diastolic blood pressure automated reading || id:ukb-a-359	n-acetylornithine	Inverse variance weighted	5	-0.0166904	0.00156189	1.183e-26	-10.6861	Diastolic blood pressure automated reading
dTGzGo	ukb-a-337	Forced expiratory volume in 1-second (FEV1) || id:ukb-a-337	(n(1) + n(8))-acetylspermidine	Inverse variance weighted	5	-0.043705	0.00411098	2.13149e-26	-10.6313	Forced expiratory volume in 1-second (FEV1)
BucRJO	ukb-a-25	Alcohol intake frequency. || id:ukb-a-25	sphingomyelin (d17:1/16:0, d18:1/15:0, d16:1/17:0)*	Inverse variance weighted	2	-0.283843	0.0268949	4.87845e-26	-10.5538	Alcohol intake frequency.
APGVyT	ieu-a-1052	Transferrin || id:ieu-a-1052	docosatrienoate (22:3n6)*	Inverse variance weighted	3	-0.334932	0.0317833	5.77185e-26	-10.538	Transferrin
xatQJZ	ieu-a-12	Crohn's disease || id:ieu-a-12	x-24801	Wald ratio	1	1.35737	0.12901	6.87883e-26	10.5215	Crohn's disease
XjZgRS	ukb-a-337	Forced expiratory volume in 1-second (FEV1) || id:ukb-a-337	carboxyethyl-gaba	Inverse variance weighted	4	0.0813764	0.00779368	1.6055e-25	10.4413	Forced expiratory volume in 1-second (FEV1)
5WEKgE	ukb-a-500	Heel bone mineral density (BMD) T-score automated || id:ukb-a-500	pc ae c36:3	Inverse variance weighted	8	0.059201	0.00568147	2.00934e-25	10.42	Heel bone mineral density (BMD) T-score automated
wkLuzs	ieu-a-798	Myocardial infarction || id:ieu-a-798	behenoyl dihydrosphingomyelin (d18:0/22:0)*	Inverse variance weighted	5	0.407945	0.0392791	2.87761e-25	10.3858	Myocardial infarction
APGVyT	ukb-b-19732	Non-cancer illness code, self-reported: hypothyroidism/myxoedema || id:ukb-b-19732	docosatrienoate (22:3n6)*	Inverse variance weighted	3	0.0143683	0.0013835	2.88857e-25	10.3854	Non-cancer illness code, self-reported: hypothyroidism/myxoedema
asDsn2	ukb-a-363	Pulse rate || id:ukb-a-363	lysopc a c24:0	Inverse variance weighted	2	-0.241834	0.0233766	4.40385e-25	-10.3451	Pulse rate
W1mNxI	ukb-a-363	Pulse rate || id:ukb-a-363	pc aa c34:2	Inverse variance weighted	5	0.162859	0.0157601	4.96412e-25	10.3336	Pulse rate
TWxt25	ukb-b-18113	Non-cancer illness code, self-reported: asthma || id:ukb-b-18113	1,2-dipalmitoyl-gpc (16:0/16:0)	Wald ratio	1	0.0474254	0.00459728	5.96828e-25	10.316	Non-cancer illness code, self-reported: asthma
EnI8Rf	ukb-a-249	Weight || id:ukb-a-249	x-11381	Inverse variance weighted	3	-0.0907324	0.0088011	6.40237e-25	-10.3092	Weight
bl5GIW	ieu-a-294	Inflammatory bowel disease || id:ieu-a-294	1-palmitoyl-2-eicosapentaenoyl-gpc (16:0/20:5)	Inverse variance weighted	3	-0.248558	0.0241436	7.42333e-25	-10.295	Inflammatory bowel disease
2180Ty	ieu-a-294	Inflammatory bowel disease || id:ieu-a-294	pc aa c38:0	Inverse variance weighted	3	-0.583996	0.0567263	7.42333e-25	-10.295	Inflammatory bowel disease
Bm6jSv	ieu-a-294	Inflammatory bowel disease || id:ieu-a-294	1-dihomo-linolenoyl-gpe (20:3n3 or 6)	Inverse variance weighted	3	0.1919	0.0186402	7.42333e-25	10.295	Inflammatory bowel disease
IUlYa2	ieu-a-294	Inflammatory bowel disease || id:ieu-a-294	1-eicosapentaenoyl-gpc (20:5)	Inverse variance weighted	3	-0.243209	0.0236241	7.42333e-25	-10.295	Inflammatory bowel disease
Z2SbbQ	ieu-a-7	Coronary heart disease || id:ieu-a-7	sm (oh) c22:2	Inverse variance weighted	5	0.805281	0.078293	8.19296e-25	10.2855	Coronary heart disease
S26sfX	ieu-a-1008	Platelet count || id:ieu-a-1008	1-oleoyl-2-eicosapentaenoyl-gpc (18:1/20:5)	Inverse variance weighted	4	-8.33286	0.810207	8.24669e-25	-10.2849	Platelet count
MInmoG	ieu-a-294	Inflammatory bowel disease || id:ieu-a-294	1-(1-enyl-palmitoyl)-2-arachidonoyl-gpe (p-16:0/20:4)*	Inverse variance weighted	5	-0.193886	0.0188592	8.60763e-25	-10.2807	Inflammatory bowel disease
wmDJd7	ieu-a-271	Mean cell haemoglobin || id:ieu-a-271	cis-3,4-methyleneheptanoylglycine	Inverse variance weighted	4	-0.365648	0.0358548	2.02356e-24	-10.198	Mean cell haemoglobin
02LW2y	ieu-a-271	Mean cell haemoglobin || id:ieu-a-271	2-butenoylglycine	Inverse variance weighted	4	-0.371321	0.0364111	2.02356e-24	-10.198	Mean cell haemoglobin
er32Is	ieu-a-271	Mean cell haemoglobin || id:ieu-a-271	trans-2-hexenoylglycine	Inverse variance weighted	4	-0.426908	0.0418618	2.02356e-24	-10.198	Mean cell haemoglobin
G3p6NL	ukb-a-363	Pulse rate || id:ukb-a-363	x-24278	Inverse variance weighted	2	-0.0917055	0.0090199	2.78282e-24	-10.167	Pulse rate
ev60og	ukb-a-363	Pulse rate || id:ukb-a-363	1-palmitoleoyl-2-linoleoyl-gpc (16:1/18:2)	Inverse variance weighted	2	0.103077	0.0101463	3.0195e-24	10.1591	Pulse rate
Bm6jSv	ukb-b-19732	Non-cancer illness code, self-reported: hypothyroidism/myxoedema || id:ukb-b-19732	1-dihomo-linolenoyl-gpe (20:3n3 or 6)	Inverse variance weighted	3	-0.00869466	0.000857528	3.70055e-24	-10.1392	Non-cancer illness code, self-reported: hypothyroidism/myxoedema
bl5GIW	ukb-b-19732	Non-cancer illness code, self-reported: hypothyroidism/myxoedema || id:ukb-b-19732	1-palmitoyl-2-eicosapentaenoyl-gpc (16:0/20:5)	Inverse variance weighted	3	0.0112617	0.00111071	3.70055e-24	10.1392	Non-cancer illness code, self-reported: hypothyroidism/myxoedema
IUlYa2	ukb-b-19732	Non-cancer illness code, self-reported: hypothyroidism/myxoedema || id:ukb-b-19732	1-eicosapentaenoyl-gpc (20:5)	Inverse variance weighted	3	0.0110194	0.00108681	3.70055e-24	10.1392	Non-cancer illness code, self-reported: hypothyroidism/myxoedema
kv1XRO	ieu-a-12	Crohn's disease || id:ieu-a-12	1-dihomo-linoleoyl-gpc (20:2)	Inverse variance weighted	2	0.209171	0.0206685	4.49237e-24	10.1203	Crohn's disease
DaRI8K	ieu-a-12	Crohn's disease || id:ieu-a-12	hydroxypalmitoyl sphingomyelin (d18:1/16:0(oh))**	Inverse variance weighted	2	0.31886	0.0315071	4.49237e-24	10.1203	Crohn's disease
2Muubo	ieu-a-12	Crohn's disease || id:ieu-a-12	gamma-glutamylvaline	Wald ratio	1	-1.11781	0.110949	7.12901e-24	-10.075	Crohn's disease
5WEKgE	ukb-a-9	Sleep duration || id:ukb-a-9	pc ae c36:3	Inverse variance weighted	8	0.0342771	0.00342768	1.5226e-23	10.0001	Sleep duration
d51Kgd	ieu-a-89	Height || id:ieu-a-89	hexadecanoylcarnitine	Wald ratio	1	-0.253682	0.0253682	1.52397e-23	-10	Height
wIwobu	ieu-a-89	Height || id:ieu-a-89	arachidoylcarnitine (c20)*	Wald ratio	1	-0.235158	0.0235158	1.52397e-23	-10	Height
l5hheq	ieu-a-89	Height || id:ieu-a-89	pc ae c36:2	Inverse variance weighted	8	-0.0859885	0.00861552	1.85257e-23	-9.98065	Height
hOEhTk	ieu-a-271	Mean cell haemoglobin || id:ieu-a-271	5-methyluridine (ribothymidine)	Inverse variance weighted	2	-0.251697	0.0252934	2.49389e-23	-9.95111	Mean cell haemoglobin
oLLP50	ieu-a-271	Mean cell haemoglobin || id:ieu-a-271	uridine	Inverse variance weighted	2	-0.591411	0.0594317	2.49389e-23	-9.95111	Mean cell haemoglobin
aGuVIY	ieu-a-12	Crohn's disease || id:ieu-a-12	octadecanoylcarnitine	Inverse variance weighted	2	-0.885305	0.0889801	2.53529e-23	-9.94947	Crohn's disease
ypYPNn	ukb-a-9	Sleep duration || id:ukb-a-9	pc aa c32:2	Inverse variance weighted	6	0.0665299	0.00670212	3.18672e-23	9.92669	Sleep duration
5dzcey	ukb-b-8184	Diagnoses - secondary ICD10: I25.9 Chronic ischaemic heart disease, unspecified || id:ukb-b-8184	sm c24:0	Inverse variance weighted	5	0.0151394	0.00152514	3.19012e-23	9.92658	Diagnoses - secondary ICD10: I25.9 Chronic ischaemic heart disease, unspecified
kv1XRO	ukb-a-363	Pulse rate || id:ukb-a-363	1-dihomo-linoleoyl-gpc (20:2)	Inverse variance weighted	2	0.0727135	0.00734241	4.03053e-23	9.90323	Pulse rate
cPU3Qa	ukb-a-336	Forced vital capacity (FVC) || id:ukb-a-336	leucylphenylalanine/isoleucylphenylalanine	Inverse variance weighted	3	-0.0207014	0.00209102	4.15554e-23	-9.90017	Forced vital capacity (FVC)
Nczq90	ukb-a-336	Forced vital capacity (FVC) || id:ukb-a-336	x-24071	Inverse variance weighted	3	-0.0376291	0.00380086	4.15554e-23	-9.90017	Forced vital capacity (FVC)
o6Frgy	ukb-a-336	Forced vital capacity (FVC) || id:ukb-a-336	prolylproline	Inverse variance weighted	3	-0.0234292	0.00236654	4.15554e-23	-9.90017	Forced vital capacity (FVC)
pTaCkE	ieu-a-12	Crohn's disease || id:ieu-a-12	octadecandienylcarnitine	Inverse variance weighted	2	-0.795424	0.0807497	6.82128e-23	-9.85049	Crohn's disease
EnI8Rf	ieu-a-970	Ulcerative colitis || id:ieu-a-970	x-11381	Inverse variance weighted	3	-0.51028	0.0518415	7.34171e-23	-9.84309	Ulcerative colitis
tmG8Pq	ieu-a-970	Ulcerative colitis || id:ieu-a-970	nervonoylcarnitine (c24:1)*	Inverse variance weighted	3	-0.562362	0.0571326	7.34171e-23	-9.84309	Ulcerative colitis
INxudw	ukb-b-18113	Non-cancer illness code, self-reported: asthma || id:ukb-b-18113	pc aa c30:0	Inverse variance weighted	2	0.0623926	0.00635815	9.89792e-23	9.813	Non-cancer illness code, self-reported: asthma
asDsn2	ukb-b-18113	Non-cancer illness code, self-reported: asthma || id:ukb-b-18113	lysopc a c24:0	Inverse variance weighted	2	0.0357661	0.00364477	9.89792e-23	9.813	Non-cancer illness code, self-reported: asthma
A600du	ukb-a-363	Pulse rate || id:ukb-a-363	pc aa c26:0	Inverse variance weighted	2	0.313636	0.03215	1.74919e-22	9.75539	Pulse rate
bnD2Ym	ukb-b-18113	Non-cancer illness code, self-reported: asthma || id:ukb-b-18113	1-palmitoyl-2-alpha-linolenoyl-gpc (16:0/18:3n3)	Inverse variance weighted	2	-0.0136123	0.00139789	2.08152e-22	-9.73773	Non-cancer illness code, self-reported: asthma
tGShKP	ieu-a-89	Height || id:ieu-a-89	dihomo-linoleoylcarnitine (c20:2)*	Wald ratio	1	-0.214741	0.0220706	2.2519e-22	-9.72973	Height
wDMryM	ukb-a-500	Heel bone mineral density (BMD) T-score automated || id:ukb-a-500	nisinate (24:6n3)	Inverse variance weighted	4	-0.101766	0.0104639	2.34827e-22	-9.72547	Heel bone mineral density (BMD) T-score automated
43IJl3	ukb-a-500	Heel bone mineral density (BMD) T-score automated || id:ukb-a-500	stearidonate (18:4n3)	Inverse variance weighted	4	-0.130732	0.0134422	2.34827e-22	-9.72547	Heel bone mineral density (BMD) T-score automated
Gla1pa	ukb-a-363	Pulse rate || id:ukb-a-363	pc aa c40:3	Inverse variance weighted	2	-0.307227	0.0316609	2.90789e-22	-9.70369	Pulse rate
LWKVFP	ukb-a-9	Sleep duration || id:ukb-a-9	pc ae c34:2	Inverse variance weighted	7	0.0545542	0.00569054	9.08524e-22	9.58681	Sleep duration
PwKKlE	ieu-a-12	Crohn's disease || id:ieu-a-12	pc aa c38:3	Inverse variance weighted	3	0.430103	0.0448785	9.36157e-22	9.58372	Crohn's disease
APGVyT	ieu-a-1008	Platelet count || id:ieu-a-1008	docosatrienoate (22:3n6)*	Inverse variance weighted	3	-11.8791	1.24182	1.11262e-21	-9.56587	Platelet count
FYvImn	ieu-a-798	Myocardial infarction || id:ieu-a-798	serine	Inverse variance weighted	5	-0.617137	0.0646281	1.30886e-21	-9.54905	Myocardial infarction
xatQJZ	ieu-a-294	Inflammatory bowel disease || id:ieu-a-294	x-24801	Wald ratio	1	0.996962	0.10467	1.65309e-21	9.52483	Inflammatory bowel disease
bl5GIW	ieu-a-1052	Transferrin || id:ieu-a-1052	1-palmitoyl-2-eicosapentaenoyl-gpc (16:0/20:5)	Inverse variance weighted	3	-0.244528	0.025732	2.04177e-21	-9.50287	Transferrin
Bm6jSv	ieu-a-1052	Transferrin || id:ieu-a-1052	1-dihomo-linolenoyl-gpe (20:3n3 or 6)	Inverse variance weighted	3	0.188789	0.0198665	2.04177e-21	9.50287	Transferrin
IUlYa2	ieu-a-1052	Transferrin || id:ieu-a-1052	1-eicosapentaenoyl-gpc (20:5)	Inverse variance weighted	3	-0.239266	0.0251783	2.04177e-21	-9.50287	Transferrin
xVlOPC	ukb-a-249	Weight || id:ukb-a-249	furaneol sulfate	Wald ratio	1	-0.083708	0.00882119	2.32335e-21	-9.48941	Weight
8ZeTDJ	ukb-a-249	Weight || id:ukb-a-249	n-acetylputrescine	Inverse variance weighted	2	-0.124618	0.0132801	6.36027e-21	-9.38386	Weight
DVBQgr	ieu-a-1008	Platelet count || id:ieu-a-1008	1-palmitoyl-2-arachidonoyl-gpe (16:0/20:4)*	Inverse variance weighted	3	-17.0666	1.82655	9.3092e-21	-9.34362	Platelet count
2180Ty	ieu-a-1008	Platelet count || id:ieu-a-1008	pc aa c38:0	Inverse variance weighted	3	-22.6055	2.41935	9.3092e-21	-9.34362	Platelet count
s8Vv6N	ukb-a-249	Weight || id:ukb-a-249	x-12714	Wald ratio	1	0.091293	0.00977814	9.963e-21	9.33644	Weight
UvZFy9	ieu-a-89	Height || id:ieu-a-89	4-hydroxyphenylacetoylcarnitine	Inverse variance weighted	3	-0.153747	0.0164851	1.095e-20	-9.32643	Height
VRlGic	ieu-a-89	Height || id:ieu-a-89	arachidonoylcarnitine (c20:4)	Inverse variance weighted	3	-0.131914	0.0141441	1.095e-20	-9.32643	Height
JDcypK	ukb-a-248	Body mass index (BMI) || id:ukb-a-248	5-acetylamino-6-amino-3-methyluracil	Inverse variance weighted	3	0.119381	0.0128929	2.05612e-20	9.25939	Body mass index (BMI)
0Q9zX1	ukb-a-248	Body mass index (BMI) || id:ukb-a-248	5-hydroxy-2-methylpyridine sulfate	Inverse variance weighted	3	0.121031	0.0130711	2.05612e-20	9.25939	Body mass index (BMI)
t27zLw	ukb-b-14177	Vascular/heart problems diagnosed by doctor: High blood pressure || id:ukb-b-14177	n-acetyl-isoputreanine	Inverse variance weighted	5	0.0133172	0.00143981	2.26119e-20	9.24923	Vascular/heart problems diagnosed by doctor: High blood pressure
nJ8HAX	ieu-a-833	Rheumatoid arthritis || id:ieu-a-833	docosatrienoate (22:3n3)	Inverse variance weighted	3	-0.377347	0.0408207	2.3743e-20	-9.24401	Rheumatoid arthritis
2180Ty	ukb-b-13745	Irritability || id:ukb-b-13745	pc aa c38:0	Inverse variance weighted	3	-0.0502327	0.00544259	2.71751e-20	-9.22956	Irritability
wqJp4I	ieu-a-270	Haemoglobin concentration || id:ieu-a-270	1-palmitoyl-gpe (16:0)	Inverse variance weighted	4	-0.154436	0.0167766	3.40398e-20	-9.2054	Haemoglobin concentration
EnI8Rf	ukb-b-14177	Vascular/heart problems diagnosed by doctor: High blood pressure || id:ukb-b-14177	x-11381	Inverse variance weighted	3	0.0346036	0.0037692	4.28604e-20	9.18062	Vascular/heart problems diagnosed by doctor: High blood pressure
ypYPNn	ukb-b-4637	Diagnoses - main ICD10: H00.1 Chalazion || id:ukb-b-4637	pc aa c32:2	Inverse variance weighted	6	-0.00393981	0.000429415	4.52264e-20	-9.17484	Diagnoses - main ICD10: H00.1 Chalazion
5WEKgE	ukb-b-4637	Diagnoses - main ICD10: H00.1 Chalazion || id:ukb-b-4637	pc ae c36:3	Inverse variance weighted	5	-0.0020525	0.000225775	9.82303e-20	-9.09089	Diagnoses - main ICD10: H00.1 Chalazion
wIwobu	ukb-b-18113	Non-cancer illness code, self-reported: asthma || id:ukb-b-18113	arachidoylcarnitine (c20)*	Wald ratio	1	0.0474869	0.00523312	1.144e-19	9.07431	Non-cancer illness code, self-reported: asthma
5WEKgE	ieu-a-89	Height || id:ieu-a-89	pc ae c36:3	Inverse variance weighted	8	-0.0491454	0.00542666	1.34981e-19	-9.05628	Height
nbhiB0	ieu-a-1106	Serum cystatin C (eGFRcys) || id:ieu-a-1106	n-acetyl-1-methylhistidine*	Inverse variance weighted	8	0.00986251	0.00109041	1.4997e-19	9.04478	Serum cystatin C (eGFRcys)
pTaCkE	ieu-a-89	Height || id:ieu-a-89	octadecandienylcarnitine	Inverse variance weighted	6	-0.244809	0.0271512	1.94125e-19	-9.01654	Height
APGVyT	ukb-b-13745	Irritability || id:ukb-b-13745	docosatrienoate (22:3n6)*	Inverse variance weighted	3	-0.0268095	0.0029777	2.18843e-19	-9.0034	Irritability
nJ8HAX	ukb-b-18113	Non-cancer illness code, self-reported: asthma || id:ukb-b-18113	docosatrienoate (22:3n3)	Inverse variance weighted	3	-0.0157273	0.00175156	2.73118e-19	-8.97905	Non-cancer illness code, self-reported: asthma
kv1XRO	ukb-b-19732	Non-cancer illness code, self-reported: hypothyroidism/myxoedema || id:ukb-b-19732	1-dihomo-linoleoyl-gpc (20:2)	Inverse variance weighted	2	-0.00687045	0.000765453	2.81667e-19	-8.97566	Non-cancer illness code, self-reported: hypothyroidism/myxoedema
u4Gz6J	ieu-a-273	Mean cell volume || id:ieu-a-273	2'-deoxyuridine	Inverse variance weighted	3	-0.835357	0.0932164	3.20362e-19	-8.96148	Mean cell volume
2Muubo	ieu-a-294	Inflammatory bowel disease || id:ieu-a-294	gamma-glutamylvaline	Wald ratio	1	-0.805091	0.0899434	3.52013e-19	-8.95108	Inflammatory bowel disease
dVokOy	ieu-a-1106	Serum cystatin C (eGFRcys) || id:ieu-a-1106	n-acetylcitrulline	Inverse variance weighted	5	0.00909432	0.00101678	3.7441e-19	8.94427	Serum cystatin C (eGFRcys)
hd47cc	ieu-a-1106	Serum cystatin C (eGFRcys) || id:ieu-a-1106	n-acetylornithine	Inverse variance weighted	5	-0.0108786	0.00121626	3.7441e-19	-8.94427	Serum cystatin C (eGFRcys)
Bm6jSv	ieu-a-1008	Platelet count || id:ieu-a-1008	1-dihomo-linolenoyl-gpe (20:3n3 or 6)	Inverse variance weighted	3	6.8953	0.771752	4.08645e-19	8.9346	Platelet count
IUlYa2	ieu-a-1008	Platelet count || id:ieu-a-1008	1-eicosapentaenoyl-gpc (20:5)	Inverse variance weighted	3	-8.73892	0.978098	4.08645e-19	-8.9346	Platelet count
64eMOw	ukb-a-363	Pulse rate || id:ukb-a-363	sm (oh) c22:1	Inverse variance weighted	5	-0.235655	0.0263837	4.19017e-19	-8.93183	Pulse rate
5dzcey	ukb-a-363	Pulse rate || id:ukb-a-363	sm c24:0	Inverse variance weighted	5	-0.24858	0.0278307	4.19017e-19	-8.93183	Pulse rate
Z2SbbQ	ukb-a-363	Pulse rate || id:ukb-a-363	sm (oh) c22:2	Inverse variance weighted	5	-0.255109	0.0285618	4.19017e-19	-8.93183	Pulse rate
DaRI8K	ieu-a-1052	Transferrin || id:ieu-a-1052	hydroxypalmitoyl sphingomyelin (d18:1/16:0(oh))**	Inverse variance weighted	2	0.239987	0.0268802	4.33587e-19	8.92805	Transferrin
aGuVIY	ieu-a-294	Inflammatory bowel disease || id:ieu-a-294	octadecanoylcarnitine	Inverse variance weighted	2	-0.650943	0.0732117	6.04273e-19	-8.89125	Inflammatory bowel disease
2ep5N6	ieu-a-270	Haemoglobin concentration || id:ieu-a-270	1,2-dilinoleoyl-gpe (18:2/18:2)*	Inverse variance weighted	3	-0.266398	0.0300239	7.12983e-19	-8.87285	Haemoglobin concentration
kv1XRO	ieu-a-1052	Transferrin || id:ieu-a-1052	1-dihomo-linoleoyl-gpc (20:2)	Inverse variance weighted	2	0.156382	0.0176333	7.40893e-19	8.86857	Transferrin
asDsn2	ukb-b-19732	Non-cancer illness code, self-reported: hypothyroidism/myxoedema || id:ukb-b-19732	lysopc a c24:0	Inverse variance weighted	2	0.021591	0.00243865	8.46686e-19	8.85369	Non-cancer illness code, self-reported: hypothyroidism/myxoedema
INxudw	ukb-b-19732	Non-cancer illness code, self-reported: hypothyroidism/myxoedema || id:ukb-b-19732	pc aa c30:0	Inverse variance weighted	2	0.0376647	0.00425412	8.46686e-19	8.85369	Non-cancer illness code, self-reported: hypothyroidism/myxoedema
ypYPNn	ukb-a-500	Heel bone mineral density (BMD) T-score automated || id:ukb-a-500	pc aa c32:2	Inverse variance weighted	6	0.114998	0.0129892	8.49002e-19	8.85339	Heel bone mineral density (BMD) T-score automated
lvJZsE	ieu-a-1126	Breast cancer (Combined Oncoarray; iCOGS; GWAS meta analysis) || id:ieu-a-1126	1-palmitoleoyl-gpc (16:1)*	Inverse variance weighted	5	0.258941	0.0294549	1.48081e-18	8.79112	Breast cancer (Combined Oncoarray; iCOGS; GWAS meta analysis)
QMv5JG	ieu-a-1126	Breast cancer (Combined Oncoarray; iCOGS; GWAS meta analysis) || id:ieu-a-1126	1-(1-enyl-palmitoyl)-gpc (p-16:0)*	Inverse variance weighted	5	0.215265	0.0244867	1.48081e-18	8.79112	Breast cancer (Combined Oncoarray; iCOGS; GWAS meta analysis)
rUAE8f	ieu-a-1126	Breast cancer (Combined Oncoarray; iCOGS; GWAS meta analysis) || id:ieu-a-1126	2-palmitoyl-gpc (16:0)*	Inverse variance weighted	5	0.220374	0.0250678	1.48081e-18	8.79112	Breast cancer (Combined Oncoarray; iCOGS; GWAS meta analysis)
XepNL9	ieu-a-1126	Breast cancer (Combined Oncoarray; iCOGS; GWAS meta analysis) || id:ieu-a-1126	stearoylcarnitine (c18)	Inverse variance weighted	5	0.243144	0.0276579	1.48081e-18	8.79112	Breast cancer (Combined Oncoarray; iCOGS; GWAS meta analysis)
LWKVFP	ukb-b-4637	Diagnoses - main ICD10: H00.1 Chalazion || id:ukb-b-4637	pc ae c34:2	Inverse variance weighted	7	-0.00317136	0.000360764	1.4864e-18	-8.79069	Diagnoses - main ICD10: H00.1 Chalazion
t27zLw	ukb-b-3965	Diagnoses - main ICD10: G56.0 Carpal tunnel syndrome || id:ukb-b-3965	n-acetyl-isoputreanine	Inverse variance weighted	5	-0.00475821	0.000546493	3.12536e-18	-8.70681	Diagnoses - main ICD10: G56.0 Carpal tunnel syndrome
LWKVFP	ieu-a-89	Height || id:ieu-a-89	pc ae c34:2	Inverse variance weighted	7	-0.0777302	0.00892947	3.17831e-18	-8.70491	Height
MInmoG	ieu-a-1008	Platelet count || id:ieu-a-1008	1-(1-enyl-palmitoyl)-2-arachidonoyl-gpe (p-16:0/20:4)*	Inverse variance weighted	5	-7.24063	0.834006	3.89736e-18	-8.68175	Platelet count
bdZs7r	ukb-a-363	Pulse rate || id:ukb-a-363	pc aa c36:2	Inverse variance weighted	9	0.164473	0.018974	4.38394e-18	8.66836	Pulse rate
TVHd6X	ukb-b-14486	Non-cancer illness code, self-reported: osteoarthritis || id:ukb-b-14486	cys-gly, oxidized	Inverse variance weighted	3	-0.0073717	0.000852006	5.05308e-18	-8.65217	Non-cancer illness code, self-reported: osteoarthritis
BS3ZnW	ukb-b-17241	Blood clot, DVT, bronchitis, emphysema, asthma, rhinitis, eczema, allergy diagnosed by doctor: Hayfever, allergic rhinitis or eczema || id:ukb-b-17241	n-acetyltyrosine	Inverse variance weighted	3	0.0188253	0.00217629	5.14137e-18	8.65019	Blood clot, DVT, bronchitis, emphysema, asthma, rhinitis, eczema, allergy diagnosed by doctor: Hayfever, allergic rhinitis or eczema
LnxdHc	ieu-a-12	Crohn's disease || id:ieu-a-12	3-hydroxyoleoylcarnitine	Wald ratio	1	-0.874909	0.101304	5.79828e-18	-8.63646	Crohn's disease
NODGtq	ieu-a-270	Haemoglobin concentration || id:ieu-a-270	1-stearoyl-2-docosahexaenoyl-gpe (18:0/22:6)*	Inverse variance weighted	3	-0.0986978	0.0114354	6.08726e-18	-8.6309	Haemoglobin concentration
pMUepz	ieu-a-270	Haemoglobin concentration || id:ieu-a-270	1-palmitoyl-2-docosahexaenoyl-gpe (16:0/22:6)*	Inverse variance weighted	3	-0.0730847	0.0084678	6.08726e-18	-8.6309	Haemoglobin concentration
VRlGic	ukb-a-500	Heel bone mineral density (BMD) T-score automated || id:ukb-a-500	arachidonoylcarnitine (c20:4)	Inverse variance weighted	7	0.0809195	0.00938117	6.36784e-18	8.62574	Heel bone mineral density (BMD) T-score automated
2180Ty	ukb-a-500	Heel bone mineral density (BMD) T-score automated || id:ukb-a-500	pc aa c38:0	Inverse variance weighted	3	-0.151829	0.0177542	1.21265e-17	-8.55172	Heel bone mineral density (BMD) T-score automated
EnI8Rf	ukb-b-17241	Blood clot, DVT, bronchitis, emphysema, asthma, rhinitis, eczema, allergy diagnosed by doctor: Hayfever, allergic rhinitis or eczema || id:ukb-b-17241	x-11381	Inverse variance weighted	3	0.0307889	0.00360319	1.2866e-17	8.54489	Blood clot, DVT, bronchitis, emphysema, asthma, rhinitis, eczema, allergy diagnosed by doctor: Hayfever, allergic rhinitis or eczema
QuN3EB	ukb-b-19732	Non-cancer illness code, self-reported: hypothyroidism/myxoedema || id:ukb-b-19732	2-linoleoyl-gpe (18:2)	Inverse variance weighted	2	-0.0100776	0.00118172	1.4898e-17	-8.52794	Non-cancer illness code, self-reported: hypothyroidism/myxoedema
hd47cc	ukb-b-8777	Cancer code, self-reported: cervical cancer || id:ukb-b-8777	n-acetylornithine	Inverse variance weighted	5	-0.000717273	8.41953e-05	1.60721e-17	-8.51916	Cancer code, self-reported: cervical cancer
dVokOy	ukb-b-8777	Cancer code, self-reported: cervical cancer || id:ukb-b-8777	n-acetylcitrulline	Inverse variance weighted	5	0.00059963	7.03861e-05	1.60721e-17	8.51916	Cancer code, self-reported: cervical cancer
G3p6NL	ukb-b-19732	Non-cancer illness code, self-reported: hypothyroidism/myxoedema || id:ukb-b-19732	x-24278	Inverse variance weighted	2	0.00800198	0.000940585	1.778e-17	8.50745	Non-cancer illness code, self-reported: hypothyroidism/myxoedema
asDsn2	ieu-a-1008	Platelet count || id:ieu-a-1008	lysopc a c24:0	Inverse variance weighted	2	-18.9073	2.23442	2.6313e-17	-8.46187	Platelet count
DaRI8K	ukb-b-19732	Non-cancer illness code, self-reported: hypothyroidism/myxoedema || id:ukb-b-19732	hydroxypalmitoyl sphingomyelin (d18:1/16:0(oh))**	Inverse variance weighted	2	-0.00989882	0.00117152	2.92349e-17	-8.44958	Non-cancer illness code, self-reported: hypothyroidism/myxoedema
XjZgRS	ukb-a-249	Weight || id:ukb-a-249	carboxyethyl-gaba	Inverse variance weighted	4	0.067093	0.00795166	3.23885e-17	8.43761	Weight
ev60og	ieu-a-1052	Transferrin || id:ieu-a-1052	1-palmitoleoyl-2-linoleoyl-gpc (16:1/18:2)	Inverse variance weighted	2	0.205947	0.0244146	3.30126e-17	8.43538	Transferrin
QuN3EB	ieu-a-1052	Transferrin || id:ieu-a-1052	2-linoleoyl-gpe (18:2)	Inverse variance weighted	2	0.23004	0.0272709	3.30126e-17	8.43538	Transferrin
DaRI8K	ieu-a-294	Inflammatory bowel disease || id:ieu-a-294	hydroxypalmitoyl sphingomyelin (d18:1/16:0(oh))**	Inverse variance weighted	2	0.219927	0.0261637	4.24891e-17	8.40582	Inflammatory bowel disease
ev60og	ieu-a-294	Inflammatory bowel disease || id:ieu-a-294	1-palmitoleoyl-2-linoleoyl-gpc (16:1/18:2)	Inverse variance weighted	2	0.198832	0.0236541	4.24891e-17	8.40582	Inflammatory bowel disease
kv1XRO	ieu-a-294	Inflammatory bowel disease || id:ieu-a-294	1-dihomo-linoleoyl-gpc (20:2)	Inverse variance weighted	2	0.144272	0.0171633	4.24891e-17	8.40582	Inflammatory bowel disease
QuN3EB	ieu-a-294	Inflammatory bowel disease || id:ieu-a-294	2-linoleoyl-gpe (18:2)	Inverse variance weighted	2	0.222093	0.0264214	4.24891e-17	8.40582	Inflammatory bowel disease
asDsn2	ieu-a-294	Inflammatory bowel disease || id:ieu-a-294	lysopc a c24:0	Inverse variance weighted	2	-0.462658	0.0550402	4.24891e-17	-8.40582	Inflammatory bowel disease
A7FT3J	ukb-b-14177	Vascular/heart problems diagnosed by doctor: High blood pressure || id:ukb-b-14177	isoleucylvaline	Inverse variance weighted	3	0.0163563	0.00194905	4.78273e-17	8.39192	Vascular/heart problems diagnosed by doctor: High blood pressure
FLsmWD	ukb-b-10753	Diabetes diagnosed by doctor || id:ukb-b-10753	pc aa c36:6	Inverse variance weighted	3	-0.0419794	0.00501553	5.76729e-17	-8.36989	Diabetes diagnosed by doctor
s8Vv6N	ieu-a-12	Crohn's disease || id:ieu-a-12	x-12714	Wald ratio	1	0.46535	0.0558323	7.76387e-17	8.33479	Crohn's disease
cPU3Qa	ukb-b-14177	Vascular/heart problems diagnosed by doctor: High blood pressure || id:ukb-b-14177	leucylphenylalanine/isoleucylphenylalanine	Inverse variance weighted	3	0.00803853	0.000964592	7.84151e-17	8.33361	Vascular/heart problems diagnosed by doctor: High blood pressure
Nczq90	ukb-b-14177	Vascular/heart problems diagnosed by doctor: High blood pressure || id:ukb-b-14177	x-24071	Inverse variance weighted	3	0.0146117	0.00175335	7.84151e-17	8.33361	Vascular/heart problems diagnosed by doctor: High blood pressure
3HuuGR	ukb-a-359	Diastolic blood pressure automated reading || id:ukb-a-359	2-aminooctanoate	Inverse variance weighted	3	-0.0262761	0.00315698	8.56212e-17	-8.3232	Diastolic blood pressure automated reading
oJZ87S	ukb-a-359	Diastolic blood pressure automated reading || id:ukb-a-359	n-acetyl-2-aminoadipate	Inverse variance weighted	3	0.0355606	0.00427247	8.56212e-17	8.3232	Diastolic blood pressure automated reading
xKlnpj	ukb-a-249	Weight || id:ukb-a-249	1-(1-enyl-stearoyl)-2-oleoyl-gpe (p-18:0/18:1)	Inverse variance weighted	2	0.118701	0.0142754	9.16952e-17	8.31507	Weight
l5hheq	ieu-a-966	Lung cancer || id:ieu-a-966	pc ae c36:2	Inverse variance weighted	8	-0.416489	0.0501145	9.51093e-17	-8.31074	Lung cancer
xVlOPC	ieu-a-12	Crohn's disease || id:ieu-a-12	furaneol sulfate	Wald ratio	1	-0.420854	0.0506744	9.97808e-17	-8.30505	Crohn's disease
aRjF5F	ieu-a-271	Mean cell haemoglobin || id:ieu-a-271	hypoxanthine	Wald ratio	1	-4.305	0.52	1.24374e-16	-8.27885	Mean cell haemoglobin
bnD2Ym	ieu-a-294	Inflammatory bowel disease || id:ieu-a-294	1-palmitoyl-2-alpha-linolenoyl-gpc (16:0/18:3n3)	Inverse variance weighted	2	0.175606	0.0212187	1.27389e-16	8.27599	Inflammatory bowel disease
G3p6NL	ieu-a-294	Inflammatory bowel disease || id:ieu-a-294	x-24278	Inverse variance weighted	2	-0.173766	0.0210473	1.50691e-16	-8.25596	Inflammatory bowel disease
5WEKgE	ukb-b-12040	Non-cancer illness code, self-reported: deep venous thrombosis (dvt) || id:ukb-b-12040	pc ae c36:3	Inverse variance weighted	8	-0.00438521	0.000531679	1.61276e-16	-8.24785	Non-cancer illness code, self-reported: deep venous thrombosis (dvt)
hfQrfn	ukb-b-18994	Miserableness || id:ukb-b-18994	pc ae c38:2	Inverse variance weighted	8	0.0208419	0.00253488	2.00028e-16	8.22207	Miserableness
l5hheq	ukb-b-8837	Cancer code, self-reported: basal cell carcinoma || id:ukb-b-8837	pc ae c36:2	Inverse variance weighted	8	-0.0047815	0.000582316	2.19029e-16	-8.21118	Cancer code, self-reported: basal cell carcinoma
xVlOPC	ukb-a-248	Body mass index (BMI) || id:ukb-a-248	furaneol sulfate	Wald ratio	1	-0.081896	0.00998659	2.39205e-16	-8.20059	Body mass index (BMI)
5WEKgE	ukb-b-11411	Blood clot, DVT, bronchitis, emphysema, asthma, rhinitis, eczema, allergy diagnosed by doctor: Blood clot in the leg (DVT) || id:ukb-b-11411	pc ae c36:3	Inverse variance weighted	8	-0.00440575	0.000538319	2.73957e-16	-8.18427	Blood clot, DVT, bronchitis, emphysema, asthma, rhinitis, eczema, allergy diagnosed by doctor: Blood clot in the leg (DVT)
87JuuT	ukb-a-248	Body mass index (BMI) || id:ukb-a-248	sulfate of piperine metabolite c18h21no3 (1)*	Inverse variance weighted	3	-0.103163	0.0126082	2.78703e-16	-8.1822	Body mass index (BMI)
bl5GIW	ukb-a-500	Heel bone mineral density (BMD) T-score automated || id:ukb-a-500	1-palmitoyl-2-eicosapentaenoyl-gpc (16:0/20:5)	Inverse variance weighted	3	-0.0635123	0.00779903	3.83652e-16	-8.14361	Heel bone mineral density (BMD) T-score automated
LnxdHc	ieu-a-294	Inflammatory bowel disease || id:ieu-a-294	3-hydroxyoleoylcarnitine	Wald ratio	1	-0.679826	0.0835627	4.10204e-16	-8.13551	Inflammatory bowel disease
5WEKgE	ukb-b-8707	Diagnoses - main ICD10: J22 Unspecified acute lower respiratory infection || id:ukb-b-8707	pc ae c36:3	Inverse variance weighted	8	-0.00252399	0.000311657	5.55974e-16	-8.0986	Diagnoses - main ICD10: J22 Unspecified acute lower respiratory infection
s8Vv6N	ukb-a-248	Body mass index (BMI) || id:ukb-a-248	x-12714	Wald ratio	1	0.0894011	0.01107	6.69321e-16	8.07599	Body mass index (BMI)
zr85p3	ieu-a-1009	Subjective well being || id:ieu-a-1009	sm (oh) c16:1	Inverse variance weighted	10	0.0930269	0.0115367	7.41187e-16	8.06354	Subjective well being
APGVyT	ukb-a-500	Heel bone mineral density (BMD) T-score automated || id:ukb-a-500	docosatrienoate (22:3n6)*	Inverse variance weighted	3	-0.0782691	0.00971047	7.6122e-16	-8.06028	Heel bone mineral density (BMD) T-score automated
rUAE8f	ukb-b-19732	Non-cancer illness code, self-reported: hypothyroidism/myxoedema || id:ukb-b-19732	2-palmitoyl-gpc (16:0)*	Inverse variance weighted	5	0.0139776	0.00173509	7.89095e-16	8.05588	Non-cancer illness code, self-reported: hypothyroidism/myxoedema
s8Vv6N	ieu-a-294	Inflammatory bowel disease || id:ieu-a-294	x-12714	Wald ratio	1	0.371144	0.0461789	9.19882e-16	8.0371	Inflammatory bowel disease
nF5414	ukb-a-336	Forced vital capacity (FVC) || id:ukb-a-336	cysteinylglycine disulfide*	Inverse variance weighted	3	0.0316617	0.00394412	9.94189e-16	8.02757	Forced vital capacity (FVC)
TVHd6X	ukb-a-336	Forced vital capacity (FVC) || id:ukb-a-336	cys-gly, oxidized	Inverse variance weighted	3	0.023509	0.00292853	9.94189e-16	8.02757	Forced vital capacity (FVC)
l5hheq	ieu-a-965	Lung adenocarcinoma || id:ieu-a-965	pc ae c36:2	Inverse variance weighted	8	-0.60408	0.0757369	1.51105e-15	-7.97604	Lung adenocarcinoma
LWKVFP	ukb-b-8707	Diagnoses - main ICD10: J22 Unspecified acute lower respiratory infection || id:ukb-b-8707	pc ae c34:2	Inverse variance weighted	7	-0.00408118	0.000511976	1.56847e-15	-7.97143	Diagnoses - main ICD10: J22 Unspecified acute lower respiratory infection
rTQWJG	ukb-b-14177	Vascular/heart problems diagnosed by doctor: High blood pressure || id:ukb-b-14177	picolinoylglycine	Wald ratio	1	-0.065518	0.00823629	1.79437e-15	-7.95479	Vascular/heart problems diagnosed by doctor: High blood pressure
ev60og	ieu-a-1008	Platelet count || id:ieu-a-1008	1-palmitoleoyl-2-linoleoyl-gpc (16:1/18:2)	Inverse variance weighted	2	7.57499	0.952513	1.82585e-15	7.95264	Platelet count
QuN3EB	ieu-a-1008	Platelet count || id:ieu-a-1008	2-linoleoyl-gpe (18:2)	Inverse variance weighted	2	8.46117	1.06395	1.82585e-15	7.95264	Platelet count
S26sfX	ukb-b-18994	Miserableness || id:ukb-b-18994	1-oleoyl-2-eicosapentaenoyl-gpc (18:1/20:5)	Inverse variance weighted	4	-0.0165164	0.00208179	2.12589e-15	-7.93377	Miserableness
nJ8HAX	ukb-b-19732	Non-cancer illness code, self-reported: hypothyroidism/myxoedema || id:ukb-b-19732	docosatrienoate (22:3n3)	Inverse variance weighted	3	-0.00929459	0.00117193	2.17402e-15	-7.93099	Non-cancer illness code, self-reported: hypothyroidism/myxoedema
LWKVFP	ieu-a-1004	Age at menopause || id:ieu-a-1004	pc ae c34:2	Inverse variance weighted	7	-0.463069	0.0584821	2.41103e-15	-7.91813	Age at menopause
BucRJO	ukb-b-10753	Diabetes diagnosed by doctor || id:ukb-b-10753	sphingomyelin (d17:1/16:0, d18:1/15:0, d16:1/17:0)*	Inverse variance weighted	2	0.0265753	0.00336627	2.91271e-15	7.89459	Diabetes diagnosed by doctor
yN4trk	ukb-b-10753	Diabetes diagnosed by doctor || id:ukb-b-10753	1-(1-enyl-palmitoyl)-2-oleoyl-gpc (p-16:0/18:1)*	Inverse variance weighted	2	0.0265314	0.0033607	2.91271e-15	7.89459	Diabetes diagnosed by doctor
ypYPNn	ukb-b-18994	Miserableness || id:ukb-b-18994	pc aa c32:2	Inverse variance weighted	6	0.0288964	0.00366411	3.1119e-15	7.88634	Miserableness
QMv5JG	ieu-a-1127	ER+ Breast cancer (Combined Oncoarray; iCOGS; GWAS meta analysis) || id:ieu-a-1127	1-(1-enyl-palmitoyl)-gpc (p-16:0)*	Inverse variance weighted	5	0.232516	0.0295182	3.3518e-15	7.87706	ER+ Breast cancer (Combined Oncoarray; iCOGS; GWAS meta analysis)
XepNL9	ieu-a-1127	ER+ Breast cancer (Combined Oncoarray; iCOGS; GWAS meta analysis) || id:ieu-a-1127	stearoylcarnitine (c18)	Inverse variance weighted	5	0.26263	0.0333411	3.3518e-15	7.87706	ER+ Breast cancer (Combined Oncoarray; iCOGS; GWAS meta analysis)
lvJZsE	ieu-a-1127	ER+ Breast cancer (Combined Oncoarray; iCOGS; GWAS meta analysis) || id:ieu-a-1127	1-palmitoleoyl-gpc (16:1)*	Inverse variance weighted	5	0.279693	0.0355072	3.3518e-15	7.87706	ER+ Breast cancer (Combined Oncoarray; iCOGS; GWAS meta analysis)
rUAE8f	ieu-a-1127	ER+ Breast cancer (Combined Oncoarray; iCOGS; GWAS meta analysis) || id:ieu-a-1127	2-palmitoyl-gpc (16:0)*	Inverse variance weighted	5	0.238035	0.0302188	3.3518e-15	7.87706	ER+ Breast cancer (Combined Oncoarray; iCOGS; GWAS meta analysis)
u18ENE	ukb-b-13251	Non-cancer illness code, self-reported: gout || id:ukb-b-13251	3-methyl-2-oxobutyrate	Wald ratio	1	-0.0148697	0.00189034	3.65701e-15	-7.86616	Non-cancer illness code, self-reported: gout
hfQrfn	ieu-a-996	Eczema || id:ieu-a-996	pc ae c38:2	Inverse variance weighted	8	0.35068	0.0445917	3.71352e-15	7.86424	Eczema
s8Qswk	ukb-b-10753	Diabetes diagnosed by doctor || id:ukb-b-10753	pc ae c38:1	Wald ratio	1	-0.0372677	0.00474276	3.9092e-15	-7.85781	Diabetes diagnosed by doctor
87JuuT	ukb-a-249	Weight || id:ukb-a-249	sulfate of piperine metabolite c18h21no3 (1)*	Inverse variance weighted	3	-0.0874369	0.0111374	4.13493e-15	-7.85077	Weight
l5hheq	ukb-a-359	Diastolic blood pressure automated reading || id:ukb-a-359	pc ae c36:2	Inverse variance weighted	8	0.0563886	0.00718834	4.34828e-15	7.84446	Diastolic blood pressure automated reading
biD8xJ	ukb-a-248	Body mass index (BMI) || id:ukb-a-248	pc aa c36:3	Inverse variance weighted	11	0.0425508	0.00542498	4.38149e-15	7.8435	Body mass index (BMI)
xVlOPC	ieu-a-294	Inflammatory bowel disease || id:ieu-a-294	furaneol sulfate	Wald ratio	1	-0.327992	0.0418685	4.73101e-15	-7.83386	Inflammatory bowel disease
f3DjMw	ieu-a-12	Crohn's disease || id:ieu-a-12	1-oleoyl-2-dihomo-linolenoyl-gpc (18:1/20:3)	Inverse variance weighted	2	0.220818	0.0282193	5.07372e-15	7.82507	Crohn's disease
IvmgUt	ieu-a-12	Crohn's disease || id:ieu-a-12	1-dihomo-linolenoyl-gpc (20:3n3 or 6)	Inverse variance weighted	2	0.233947	0.0298971	5.07372e-15	7.82507	Crohn's disease
iCT5wr	ukb-b-18113	Non-cancer illness code, self-reported: asthma || id:ukb-b-18113	1-palmitoyl-2-meadoyl-gpc (16:0/20:3n9)	Wald ratio	1	0.0157314	0.00201046	5.0844e-15	7.82481	Non-cancer illness code, self-reported: asthma
Ik0VgZ	ukb-b-14177	Vascular/heart problems diagnosed by doctor: High blood pressure || id:ukb-b-14177	margaroylcarnitine (c17)*	Inverse variance weighted	2	0.0495115	0.00634794	6.20949e-15	7.79962	Vascular/heart problems diagnosed by doctor: High blood pressure
pCZJ7N	ukb-b-14177	Vascular/heart problems diagnosed by doctor: High blood pressure || id:ukb-b-14177	linoleoylcarnitine (c18:2)*	Inverse variance weighted	2	0.0401351	0.00514578	6.20949e-15	7.79962	Vascular/heart problems diagnosed by doctor: High blood pressure
ypYPNn	ieu-a-1004	Age at menopause || id:ieu-a-1004	pc aa c32:2	Inverse variance weighted	6	-0.529758	0.0679273	6.24474e-15	-7.7989	Age at menopause
lvJZsE	ukb-b-10093	Tense / 'highly strung' || id:ukb-b-10093	1-palmitoleoyl-gpc (16:1)*	Inverse variance weighted	7	0.0245116	0.00314587	6.61304e-15	7.79167	Tense / 'highly strung'
ypYPNn	ieu-a-966	Lung cancer || id:ieu-a-966	pc aa c32:2	Inverse variance weighted	6	-0.470864	0.0604878	7.00178e-15	-7.78445	Lung cancer
yfpVRE	ukb-b-16048	Non-cancer illness code, self-reported: pulmonary embolism +/- dvt || id:ukb-b-16048	bradykinin, des-arg(9)	Inverse variance weighted	3	0.00851845	0.00109451	7.08796e-15	7.7829	Non-cancer illness code, self-reported: pulmonary embolism +/- dvt
S26sfX	ukb-b-12040	Non-cancer illness code, self-reported: deep venous thrombosis (dvt) || id:ukb-b-12040	1-oleoyl-2-eicosapentaenoyl-gpc (18:1/20:5)	Inverse variance weighted	4	0.00458332	0.000590633	8.49236e-15	7.76001	Non-cancer illness code, self-reported: deep venous thrombosis (dvt)
8Z7QaZ	ieu-a-89	Height || id:ieu-a-89	x-12688	Wald ratio	1	0.0643766	0.00831532	9.79147e-15	7.74194	Height
Jjonf2	ieu-a-89	Height || id:ieu-a-89	pc aa c42:4	Inverse variance weighted	4	0.251572	0.0324948	9.79147e-15	7.74194	Height
LWKVFP	ieu-a-273	Mean cell volume || id:ieu-a-273	pc ae c34:2	Inverse variance weighted	5	-0.661236	0.0856173	1.13483e-14	-7.72316	Mean cell volume
ypYPNn	ieu-a-89	Height || id:ieu-a-89	pc aa c32:2	Inverse variance weighted	6	-0.0972598	0.0126127	1.24574e-14	-7.71127	Height
l5hheq	ukb-b-12040	Non-cancer illness code, self-reported: deep venous thrombosis (dvt) || id:ukb-b-12040	pc ae c36:2	Inverse variance weighted	8	-0.00654041	0.000850107	1.43016e-14	-7.69363	Non-cancer illness code, self-reported: deep venous thrombosis (dvt)
LWKVFP	ukb-b-12040	Non-cancer illness code, self-reported: deep venous thrombosis (dvt) || id:ukb-b-12040	pc ae c34:2	Inverse variance weighted	7	-0.00671923	0.000873419	1.43705e-14	-7.69302	Non-cancer illness code, self-reported: deep venous thrombosis (dvt)
l5hheq	ukb-b-11411	Blood clot, DVT, bronchitis, emphysema, asthma, rhinitis, eczema, allergy diagnosed by doctor: Blood clot in the leg (DVT) || id:ukb-b-11411	pc ae c36:2	Inverse variance weighted	8	-0.00660199	0.000860723	1.71628e-14	-7.67028	Blood clot, DVT, bronchitis, emphysema, asthma, rhinitis, eczema, allergy diagnosed by doctor: Blood clot in the leg (DVT)
LWKVFP	ukb-b-11411	Blood clot, DVT, bronchitis, emphysema, asthma, rhinitis, eczema, allergy diagnosed by doctor: Blood clot in the leg (DVT) || id:ukb-b-11411	pc ae c34:2	Inverse variance weighted	7	-0.00677111	0.000884322	1.90561e-14	-7.65684	Blood clot, DVT, bronchitis, emphysema, asthma, rhinitis, eczema, allergy diagnosed by doctor: Blood clot in the leg (DVT)
wkLuzs	ukb-b-14177	Vascular/heart problems diagnosed by doctor: High blood pressure || id:ukb-b-14177	behenoyl dihydrosphingomyelin (d18:0/22:0)*	Inverse variance weighted	5	0.0269871	0.00352603	1.95323e-14	7.65367	Vascular/heart problems diagnosed by doctor: High blood pressure
s8Qswk	ukb-a-335	Sodium in urine || id:ukb-a-335	pc ae c38:1	Wald ratio	1	0.193329	0.0252693	1.99788e-14	7.65076	Sodium in urine
Ik0VgZ	ieu-a-970	Ulcerative colitis || id:ieu-a-970	margaroylcarnitine (c17)*	Inverse variance weighted	2	-0.667248	0.0873132	2.13872e-14	-7.642	Ulcerative colitis
IvmgUt	ukb-b-18113	Non-cancer illness code, self-reported: asthma || id:ukb-b-18113	1-dihomo-linolenoyl-gpc (20:3n3 or 6)	Inverse variance weighted	2	-0.0122741	0.00160767	2.26257e-14	-7.63475	Non-cancer illness code, self-reported: asthma
64eMOw	ukb-b-12040	Non-cancer illness code, self-reported: deep venous thrombosis (dvt) || id:ukb-b-12040	sm (oh) c22:1	Inverse variance weighted	5	-0.0138245	0.00181199	2.35722e-14	-7.62947	Non-cancer illness code, self-reported: deep venous thrombosis (dvt)
5dzcey	ukb-b-12040	Non-cancer illness code, self-reported: deep venous thrombosis (dvt) || id:ukb-b-12040	sm c24:0	Inverse variance weighted	5	-0.0145827	0.00191137	2.35722e-14	-7.62947	Non-cancer illness code, self-reported: deep venous thrombosis (dvt)
Z2SbbQ	ukb-b-12040	Non-cancer illness code, self-reported: deep venous thrombosis (dvt) || id:ukb-b-12040	sm (oh) c22:2	Inverse variance weighted	5	-0.0149658	0.00196157	2.35722e-14	-7.62947	Non-cancer illness code, self-reported: deep venous thrombosis (dvt)
wkLuzs	ukb-a-25	Alcohol intake frequency. || id:ukb-a-25	behenoyl dihydrosphingomyelin (d18:0/22:0)*	Inverse variance weighted	5	0.104887	0.0137952	2.88986e-14	7.60316	Alcohol intake frequency.
APGVyT	ukb-a-9	Sleep duration || id:ukb-a-9	docosatrienoate (22:3n6)*	Inverse variance weighted	3	-0.0445037	0.0058584	3.04081e-14	-7.59657	Sleep duration
s9JVWl	ukb-b-14177	Vascular/heart problems diagnosed by doctor: High blood pressure || id:ukb-b-14177	alpha-glutamyltyrosine	Inverse variance weighted	2	0.0154104	0.0020297	3.13873e-14	7.59247	Vascular/heart problems diagnosed by doctor: High blood pressure
hfQrfn	ieu-a-1006	Mean platelet volume || id:ieu-a-1006	pc ae c38:2	Inverse variance weighted	8	-0.0197482	0.00260424	3.37432e-14	-7.58309	Mean platelet volume
bl5GIW	ieu-a-89	Height || id:ieu-a-89	1-palmitoyl-2-eicosapentaenoyl-gpc (16:0/20:5)	Inverse variance weighted	3	0.0562134	0.00741824	3.51674e-14	7.57772	Height
Bm6jSv	ieu-a-89	Height || id:ieu-a-89	1-dihomo-linolenoyl-gpe (20:3n3 or 6)	Inverse variance weighted	3	-0.0433998	0.00572729	3.51674e-14	-7.57772	Height
IUlYa2	ieu-a-89	Height || id:ieu-a-89	1-eicosapentaenoyl-gpc (20:5)	Inverse variance weighted	3	0.0550038	0.00725862	3.51674e-14	7.57772	Height
nF5414	ukb-a-359	Diastolic blood pressure automated reading || id:ukb-a-359	cysteinylglycine disulfide*	Inverse variance weighted	3	0.0372779	0.00492194	3.62419e-14	7.57382	Diastolic blood pressure automated reading
A600du	ukb-b-13745	Irritability || id:ukb-b-13745	pc aa c26:0	Inverse variance weighted	2	0.0546242	0.00721506	3.7074e-14	7.57087	Irritability
DVBQgr	ukb-b-4637	Diagnoses - main ICD10: H00.1 Chalazion || id:ukb-b-4637	1-palmitoyl-2-arachidonoyl-gpe (16:0/20:4)*	Inverse variance weighted	3	0.00392046	0.000517951	3.75614e-14	7.56917	Diagnoses - main ICD10: H00.1 Chalazion
5dzcey	ukb-b-11411	Blood clot, DVT, bronchitis, emphysema, asthma, rhinitis, eczema, allergy diagnosed by doctor: Blood clot in the leg (DVT) || id:ukb-b-11411	sm c24:0	Inverse variance weighted	5	-0.0146387	0.00193515	3.89029e-14	-7.56461	Blood clot, DVT, bronchitis, emphysema, asthma, rhinitis, eczema, allergy diagnosed by doctor: Blood clot in the leg (DVT)
64eMOw	ukb-b-11411	Blood clot, DVT, bronchitis, emphysema, asthma, rhinitis, eczema, allergy diagnosed by doctor: Blood clot in the leg (DVT) || id:ukb-b-11411	sm (oh) c22:1	Inverse variance weighted	5	-0.0138776	0.00183454	3.89029e-14	-7.56461	Blood clot, DVT, bronchitis, emphysema, asthma, rhinitis, eczema, allergy diagnosed by doctor: Blood clot in the leg (DVT)
hfQrfn	ieu-a-1004	Age at menopause || id:ieu-a-1004	pc ae c38:2	Inverse variance weighted	8	-0.356651	0.0471648	3.97489e-14	-7.56181	Age at menopause
kv1XRO	ukb-b-13745	Irritability || id:ukb-b-13745	1-dihomo-linoleoyl-gpc (20:2)	Inverse variance weighted	2	0.0124397	0.00164742	4.31835e-14	7.55103	Irritability
S26sfX	ukb-b-4637	Diagnoses - main ICD10: H00.1 Chalazion || id:ukb-b-4637	1-oleoyl-2-eicosapentaenoyl-gpc (18:1/20:5)	Inverse variance weighted	4	0.00184214	0.000243961	4.32068e-14	7.55096	Diagnoses - main ICD10: H00.1 Chalazion
S26sfX	ukb-b-11411	Blood clot, DVT, bronchitis, emphysema, asthma, rhinitis, eczema, allergy diagnosed by doctor: Blood clot in the leg (DVT) || id:ukb-b-11411	1-oleoyl-2-eicosapentaenoyl-gpc (18:1/20:5)	Inverse variance weighted	4	0.00449922	0.000598015	5.32903e-14	7.52359	Blood clot, DVT, bronchitis, emphysema, asthma, rhinitis, eczema, allergy diagnosed by doctor: Blood clot in the leg (DVT)
5WEKgE	ukb-b-8837	Cancer code, self-reported: basal cell carcinoma || id:ukb-b-8837	pc ae c36:3	Inverse variance weighted	8	-0.00273616	0.000364193	5.78147e-14	-7.51294	Cancer code, self-reported: basal cell carcinoma
hfQrfn	ukb-b-11411	Blood clot, DVT, bronchitis, emphysema, asthma, rhinitis, eczema, allergy diagnosed by doctor: Blood clot in the leg (DVT) || id:ukb-b-11411	pc ae c38:2	Inverse variance weighted	8	-0.00547015	0.000728171	5.81519e-14	-7.51218	Blood clot, DVT, bronchitis, emphysema, asthma, rhinitis, eczema, allergy diagnosed by doctor: Blood clot in the leg (DVT)
bWJ7db	ukb-a-249	Weight || id:ukb-a-249	leucine	Inverse variance weighted	8	0.131328	0.0174924	6.01564e-14	7.50774	Weight
biD8xJ	ieu-a-966	Lung cancer || id:ieu-a-966	pc aa c36:3	Inverse variance weighted	11	-0.26899	0.0358385	6.11392e-14	-7.50562	Lung cancer
bnD2Ym	ieu-a-1052	Transferrin || id:ieu-a-1052	1-palmitoyl-2-alpha-linolenoyl-gpc (16:0/18:3n3)	Inverse variance weighted	2	0.165681	0.0220814	6.22838e-14	7.50319	Transferrin
ZZdgkE	ieu-a-12	Crohn's disease || id:ieu-a-12	propionylcarnitine (c3)	Wald ratio	1	-0.71756	0.0956824	6.41114e-14	-7.4994	Crohn's disease
rHGF9e	ieu-a-12	Crohn's disease || id:ieu-a-12	ergothioneine	Wald ratio	1	0.625655	0.0834395	6.46505e-14	7.4983	Crohn's disease
5WEKgE	ieu-a-273	Mean cell volume || id:ieu-a-273	pc ae c36:3	Inverse variance weighted	8	-0.369552	0.0493009	6.58744e-14	-7.49584	Mean cell volume
ypYPNn	ukb-b-8707	Diagnoses - main ICD10: J22 Unspecified acute lower respiratory infection || id:ukb-b-8707	pc aa c32:2	Inverse variance weighted	6	-0.00456497	0.000609403	6.84111e-14	-7.49088	Diagnoses - main ICD10: J22 Unspecified acute lower respiratory infection
RbPheI	ukb-a-500	Heel bone mineral density (BMD) T-score automated || id:ukb-a-500	pc aa c38:4	Inverse variance weighted	15	-0.0372066	0.00496927	7.02904e-14	-7.48733	Heel bone mineral density (BMD) T-score automated
KfGV2h	ukb-a-500	Heel bone mineral density (BMD) T-score automated || id:ukb-a-500	x-16397	Wald ratio	1	-0.194632	0.0260568	8.04778e-14	-7.46954	Heel bone mineral density (BMD) T-score automated
XVHJCG	ieu-a-22	Schizophrenia || id:ieu-a-22	n6,n6-dimethyllysine	Inverse variance weighted	5	-0.0312752	0.00418779	8.1299e-14	-7.4682	Schizophrenia
QuN3EB	ukb-b-13745	Irritability || id:ukb-b-13745	2-linoleoyl-gpe (18:2)	Inverse variance weighted	2	0.0189836	0.00254343	8.40687e-14	7.46379	Irritability
ev60og	ukb-b-13745	Irritability || id:ukb-b-13745	1-palmitoleoyl-2-linoleoyl-gpc (16:1/18:2)	Inverse variance weighted	2	0.0169953	0.00227704	8.40687e-14	7.46379	Irritability
EnI8Rf	ieu-a-1008	Platelet count || id:ieu-a-1008	x-11381	Inverse variance weighted	3	12.8789	1.72567	8.44936e-14	7.46313	Platelet count
B9a5pb	ieu-a-22	Schizophrenia || id:ieu-a-22	x-12112	Inverse variance weighted	9	-0.0316571	0.00425237	9.72471e-14	-7.44459	Schizophrenia
A7FT3J	ukb-a-337	Forced expiratory volume in 1-second (FEV1) || id:ukb-a-337	isoleucylvaline	Inverse variance weighted	3	-0.0331875	0.00446054	1.00508e-13	-7.44023	Forced expiratory volume in 1-second (FEV1)
s8Qswk	ukb-a-249	Weight || id:ukb-a-249	pc ae c38:1	Wald ratio	1	-0.168599	0.02268	1.0549e-13	-7.43384	Weight
hfQrfn	ukb-b-12040	Non-cancer illness code, self-reported: deep venous thrombosis (dvt) || id:ukb-b-12040	pc ae c38:2	Inverse variance weighted	8	-0.00534475	0.000719192	1.0728e-13	-7.43161	Non-cancer illness code, self-reported: deep venous thrombosis (dvt)
BqPVj4	ukb-b-18113	Non-cancer illness code, self-reported: asthma || id:ukb-b-18113	sphingomyelin (d18:2/14:0, d18:1/14:1)*	Wald ratio	1	0.0543223	0.00731161	1.08939e-13	7.42958	Non-cancer illness code, self-reported: asthma
zr85p3	ieu-a-270	Haemoglobin concentration || id:ieu-a-270	sm (oh) c16:1	Inverse variance weighted	10	0.167742	0.0225882	1.11855e-13	7.42609	Haemoglobin concentration
Nczq90	ieu-a-89	Height || id:ieu-a-89	x-24071	Inverse variance weighted	3	-0.0520763	0.00701546	1.14432e-13	-7.42307	Height
o6Frgy	ieu-a-89	Height || id:ieu-a-89	prolylproline	Inverse variance weighted	3	-0.0324244	0.00436806	1.14432e-13	-7.42307	Height
G3p6NL	ukb-b-13745	Irritability || id:ukb-b-13745	x-24278	Inverse variance weighted	2	-0.0150063	0.00202443	1.23831e-13	-7.41262	Irritability
43IJl3	ukb-b-12040	Non-cancer illness code, self-reported: deep venous thrombosis (dvt) || id:ukb-b-12040	stearidonate (18:4n3)	Inverse variance weighted	4	0.00931678	0.00125783	1.29182e-13	7.40701	Non-cancer illness code, self-reported: deep venous thrombosis (dvt)
Jjonf2	ukb-b-12040	Non-cancer illness code, self-reported: deep venous thrombosis (dvt) || id:ukb-b-12040	pc aa c42:4	Inverse variance weighted	4	0.0236824	0.0031973	1.29182e-13	7.40701	Non-cancer illness code, self-reported: deep venous thrombosis (dvt)
wDMryM	ukb-b-12040	Non-cancer illness code, self-reported: deep venous thrombosis (dvt) || id:ukb-b-12040	nisinate (24:6n3)	Inverse variance weighted	4	0.0072525	0.000979141	1.29182e-13	7.40701	Non-cancer illness code, self-reported: deep venous thrombosis (dvt)
cewuNi	ieu-a-1008	Platelet count || id:ieu-a-1008	dodecanoylcarnitine	Inverse variance weighted	3	31.1707	4.20968	1.31618e-13	7.40453	Platelet count
wqJp4I	ieu-a-275	Red blood cell count || id:ieu-a-275	1-palmitoyl-gpe (16:0)	Inverse variance weighted	4	-0.0481639	0.00651291	1.41262e-13	-7.39514	Red blood cell count
hfQrfn	ieu-a-833	Rheumatoid arthritis || id:ieu-a-833	pc ae c38:2	Inverse variance weighted	8	-0.215971	0.0292118	1.43254e-13	-7.39328	Rheumatoid arthritis
dTGzGo	ukb-b-14486	Non-cancer illness code, self-reported: osteoarthritis || id:ukb-b-14486	(n(1) + n(8))-acetylspermidine	Inverse variance weighted	5	0.0083294	0.00112764	1.5067e-13	7.38657	Non-cancer illness code, self-reported: osteoarthritis
Jjonf2	ukb-b-11411	Blood clot, DVT, bronchitis, emphysema, asthma, rhinitis, eczema, allergy diagnosed by doctor: Blood clot in the leg (DVT) || id:ukb-b-11411	pc aa c42:4	Inverse variance weighted	4	0.0238302	0.00323724	1.82182e-13	7.36126	Blood clot, DVT, bronchitis, emphysema, asthma, rhinitis, eczema, allergy diagnosed by doctor: Blood clot in the leg (DVT)
43IJl3	ukb-b-11411	Blood clot, DVT, bronchitis, emphysema, asthma, rhinitis, eczema, allergy diagnosed by doctor: Blood clot in the leg (DVT) || id:ukb-b-11411	stearidonate (18:4n3)	Inverse variance weighted	4	0.00937492	0.00127355	1.82182e-13	7.36126	Blood clot, DVT, bronchitis, emphysema, asthma, rhinitis, eczema, allergy diagnosed by doctor: Blood clot in the leg (DVT)
wDMryM	ukb-b-11411	Blood clot, DVT, bronchitis, emphysema, asthma, rhinitis, eczema, allergy diagnosed by doctor: Blood clot in the leg (DVT) || id:ukb-b-11411	nisinate (24:6n3)	Inverse variance weighted	4	0.00729777	0.000991375	1.82182e-13	7.36126	Blood clot, DVT, bronchitis, emphysema, asthma, rhinitis, eczema, allergy diagnosed by doctor: Blood clot in the leg (DVT)
S26sfX	ieu-a-966	Lung cancer || id:ieu-a-966	1-oleoyl-2-eicosapentaenoyl-gpc (18:1/20:5)	Inverse variance weighted	4	0.251315	0.0341477	1.84383e-13	7.35966	Lung cancer
boBryA	ukb-b-10753	Diabetes diagnosed by doctor || id:ukb-b-10753	tiglylcarnitine (c5:1-dc)	Inverse variance weighted	3	-0.0153443	0.00208858	2.031e-13	-7.34674	Diabetes diagnosed by doctor
bFrMQp	ukb-a-9	Sleep duration || id:ukb-a-9	x-11444	Inverse variance weighted	10	0.0250493	0.00340976	2.0367e-13	7.34636	Sleep duration
MInmoG	ieu-a-89	Height || id:ieu-a-89	1-(1-enyl-palmitoyl)-2-arachidonoyl-gpe (p-16:0/20:4)*	Inverse variance weighted	5	0.0415634	0.00566623	2.21256e-13	7.33528	Height
L4z4Rj	ieu-a-1102	Chronic kidney disease || id:ieu-a-1102	creatine	Wald ratio	1	1.01929	0.138994	2.24498e-13	7.33333	Chronic kidney disease
yfpVRE	ukb-b-13704	Blood clot, DVT, bronchitis, emphysema, asthma, rhinitis, eczema, allergy diagnosed by doctor: Blood clot in the lung || id:ukb-b-13704	bradykinin, des-arg(9)	Inverse variance weighted	3	0.00803212	0.00109612	2.3399e-13	7.32778	Blood clot, DVT, bronchitis, emphysema, asthma, rhinitis, eczema, allergy diagnosed by doctor: Blood clot in the lung
9E513E	ukb-a-9	Sleep duration || id:ukb-a-9	pc aa c40:5	Inverse variance weighted	9	-0.0426826	0.00582868	2.42762e-13	-7.32285	Sleep duration
oJZ87S	ieu-a-1106	Serum cystatin C (eGFRcys) || id:ieu-a-1106	n-acetyl-2-aminoadipate	Inverse variance weighted	3	0.0232591	0.00317667	2.44573e-13	7.32185	Serum cystatin C (eGFRcys)
3HuuGR	ieu-a-1106	Serum cystatin C (eGFRcys) || id:ieu-a-1106	2-aminooctanoate	Inverse variance weighted	3	-0.0171864	0.00234727	2.44573e-13	-7.32185	Serum cystatin C (eGFRcys)
u0mbPU	ieu-a-1106	Serum cystatin C (eGFRcys) || id:ieu-a-1106	methionine sulfone	Inverse variance weighted	3	-0.0215557	0.00294403	2.44573e-13	-7.32185	Serum cystatin C (eGFRcys)
3HuuGR	ieu-a-22	Schizophrenia || id:ieu-a-22	2-aminooctanoate	Inverse variance weighted	3	-0.102197	0.0139769	2.63575e-13	-7.31181	Schizophrenia
oJZ87S	ieu-a-22	Schizophrenia || id:ieu-a-22	n-acetyl-2-aminoadipate	Inverse variance weighted	3	0.138307	0.0189156	2.63575e-13	7.31181	Schizophrenia
87JuuT	ieu-a-1126	Breast cancer (Combined Oncoarray; iCOGS; GWAS meta analysis) || id:ieu-a-1126	sulfate of piperine metabolite c18h21no3 (1)*	Inverse variance weighted	3	-0.246075	0.0336836	2.76275e-13	-7.30548	Breast cancer (Combined Oncoarray; iCOGS; GWAS meta analysis)
UZxTtu	ieu-a-1126	Breast cancer (Combined Oncoarray; iCOGS; GWAS meta analysis) || id:ieu-a-1126	perfluorooctanesulfonate (pfos)	Inverse variance weighted	3	-0.291033	0.0398377	2.76275e-13	-7.30548	Breast cancer (Combined Oncoarray; iCOGS; GWAS meta analysis)
LWKVFP	ieu-a-996	Eczema || id:ieu-a-996	pc ae c34:2	Inverse variance weighted	7	0.398038	0.0545355	2.90554e-13	7.2987	Eczema
DaRI8K	ukb-b-13745	Irritability || id:ukb-b-13745	hydroxypalmitoyl sphingomyelin (d18:1/16:0(oh))**	Inverse variance weighted	2	0.0183517	0.00252146	3.38291e-13	7.2782	Irritability
APGVyT	ieu-a-89	Height || id:ieu-a-89	docosatrienoate (22:3n6)*	Inverse variance weighted	3	0.0668834	0.00920823	3.77371e-13	7.26344	Height
rUAE8f	ukb-b-15790	Diagnoses - secondary ICD10: D64.9 Anaemia, unspecified || id:ukb-b-15790	2-palmitoyl-gpc (16:0)*	Inverse variance weighted	5	0.00627344	0.000864181	3.88793e-13	7.25941	Diagnoses - secondary ICD10: D64.9 Anaemia, unspecified
7AtiBd	ukb-b-18349	Non-cancer illness code, self-reported: benign breast lump || id:ukb-b-18349	pc ae c42:2	Inverse variance weighted	8	-0.00292191	0.00040387	4.66258e-13	-7.23479	Non-cancer illness code, self-reported: benign breast lump
xKlnpj	ieu-a-7	Coronary heart disease || id:ieu-a-7	1-(1-enyl-stearoyl)-2-oleoyl-gpe (p-18:0/18:1)	Inverse variance weighted	2	-0.590274	0.0816145	4.74316e-13	-7.23246	Coronary heart disease
ypYPNn	ieu-a-801	Bipolar disorder || id:ieu-a-801	pc aa c32:2	Inverse variance weighted	6	0.602111	0.0832576	4.76267e-13	7.2319	Bipolar disorder
t27zLw	ukb-b-10753	Diabetes diagnosed by doctor || id:ukb-b-10753	n-acetyl-isoputreanine	Inverse variance weighted	5	0.00508842	0.000703811	4.83664e-13	7.22981	Diabetes diagnosed by doctor
6GuPUp	ieu-a-1127	ER+ Breast cancer (Combined Oncoarray; iCOGS; GWAS meta analysis) || id:ieu-a-1127	x-18913	Inverse variance weighted	5	0.196028	0.0271198	4.89366e-13	7.22822	ER+ Breast cancer (Combined Oncoarray; iCOGS; GWAS meta analysis)
viIDke	ieu-a-1127	ER+ Breast cancer (Combined Oncoarray; iCOGS; GWAS meta analysis) || id:ieu-a-1127	2-hydroxysebacate	Inverse variance weighted	5	0.153187	0.0211929	4.89366e-13	7.22822	ER+ Breast cancer (Combined Oncoarray; iCOGS; GWAS meta analysis)
aGuVIY	ieu-a-1008	Platelet count || id:ieu-a-1008	octadecanoylcarnitine	Inverse variance weighted	4	19.2968	2.67556	5.50286e-13	7.21227	Platelet count
ypYPNn	ieu-a-965	Lung adenocarcinoma || id:ieu-a-965	pc aa c32:2	Inverse variance weighted	6	-0.653995	0.0908095	5.94058e-13	-7.20184	Lung adenocarcinoma
czPzMj	ieu-a-274	Packed cell volume || id:ieu-a-274	thioproline	Wald ratio	1	-1.59166	0.221063	6.02126e-13	-7.2	Packed cell volume
5WEKgE	ieu-a-801	Bipolar disorder || id:ieu-a-801	pc ae c36:3	Inverse variance weighted	8	0.307628	0.04274	6.12476e-13	7.19768	Bipolar disorder
mDd4SI	ieu-a-89	Height || id:ieu-a-89	argininate*	Inverse variance weighted	2	-0.130397	0.0181615	6.97862e-13	-7.17985	Height
wDMryM	ieu-a-275	Red blood cell count || id:ieu-a-275	nisinate (24:6n3)	Inverse variance weighted	4	-0.0552131	0.00770416	7.68458e-13	-7.16667	Red blood cell count
43IJl3	ieu-a-275	Red blood cell count || id:ieu-a-275	stearidonate (18:4n3)	Inverse variance weighted	4	-0.0709284	0.00989699	7.68458e-13	-7.16667	Red blood cell count
l34vPv	ieu-a-12	Crohn's disease || id:ieu-a-12	sphingomyelin (d18:1/20:2, d18:2/20:1, d16:1/22:2)*	Wald ratio	1	0.480923	0.0672047	8.30034e-13	7.1561	Crohn's disease
G5tcXK	ieu-a-12	Crohn's disease || id:ieu-a-12	1-stearoyl-2-linoleoyl-gpe (18:0/18:2)*	Wald ratio	1	0.316472	0.044224	8.30034e-13	7.1561	Crohn's disease
biD8xJ	ukb-b-8707	Diagnoses - main ICD10: J22 Unspecified acute lower respiratory infection || id:ukb-b-8707	pc aa c36:3	Inverse variance weighted	11	-0.00257035	0.000359656	8.88864e-13	-7.1467	Diagnoses - main ICD10: J22 Unspecified acute lower respiratory infection
S5i23A	ukb-b-18349	Non-cancer illness code, self-reported: benign breast lump || id:ukb-b-18349	pc ae c42:3	Inverse variance weighted	10	-0.00242259	0.000339449	9.54977e-13	-7.13684	Non-cancer illness code, self-reported: benign breast lump
2ccX6r	ukb-a-336	Forced vital capacity (FVC) || id:ukb-a-336	x-24241	Inverse variance weighted	7	-0.0178851	0.00250648	9.64212e-13	-7.13552	Forced vital capacity (FVC)
01Lweg	ukb-b-14486	Non-cancer illness code, self-reported: osteoarthritis || id:ukb-b-14486	myristoyl dihydrosphingomyelin (d18:0/14:0)*	Inverse variance weighted	5	0.0102835	0.00144151	9.76378e-13	7.1338	Non-cancer illness code, self-reported: osteoarthritis
ypYPNn	ieu-a-833	Rheumatoid arthritis || id:ieu-a-833	pc aa c32:2	Inverse variance weighted	6	-0.296676	0.0416786	1.09352e-12	-7.11819	Rheumatoid arthritis
l5hheq	ukb-a-248	Body mass index (BMI) || id:ukb-a-248	pc ae c36:2	Inverse variance weighted	8	0.0499402	0.00701711	1.10362e-12	7.11692	Body mass index (BMI)
LWKVFP	ieu-a-1006	Mean platelet volume || id:ieu-a-1006	pc ae c34:2	Inverse variance weighted	5	-0.023761	0.00333968	1.12106e-12	-7.11476	Mean platelet volume
wqJp4I	ieu-a-274	Packed cell volume || id:ieu-a-274	1-palmitoyl-gpe (16:0)	Inverse variance weighted	4	-0.376651	0.0529427	1.12474e-12	-7.11431	Packed cell volume
qKtmTE	ieu-a-12	Crohn's disease || id:ieu-a-12	beta-hydroxyisovaleroylcarnitine	Wald ratio	1	-0.706262	0.0993535	1.17243e-12	-7.10858	Crohn's disease
MInmoG	ieu-a-1004	Age at menopause || id:ieu-a-1004	1-(1-enyl-palmitoyl)-2-arachidonoyl-gpe (p-16:0/20:4)*	Inverse variance weighted	5	0.263054	0.0370474	1.24341e-12	7.10046	Age at menopause
yK15mu	ieu-a-275	Red blood cell count || id:ieu-a-275	sm c18:1	Inverse variance weighted	6	-0.0775427	0.0109216	1.24826e-12	-7.09992	Red blood cell count
BqPVj4	ieu-a-12	Crohn's disease || id:ieu-a-12	sphingomyelin (d18:2/14:0, d18:1/14:1)*	Wald ratio	1	-0.907155	0.127953	1.34371e-12	-7.08973	Crohn's disease
KNvR7s	ukb-b-14027	Non-cancer illness code, self-reported: chickenpox || id:ukb-b-14027	n-stearoyl-sphinganine (d18:0/18:0)*	Inverse variance weighted	5	0.0036559	0.000516216	1.41984e-12	7.0821	Non-cancer illness code, self-reported: chickenpox
zr85p3	ukb-b-14027	Non-cancer illness code, self-reported: chickenpox || id:ukb-b-14027	sm (oh) c16:1	Inverse variance weighted	5	0.00433161	0.000611628	1.41984e-12	7.0821	Non-cancer illness code, self-reported: chickenpox
01Lweg	ukb-b-14027	Non-cancer illness code, self-reported: chickenpox || id:ukb-b-14027	myristoyl dihydrosphingomyelin (d18:0/14:0)*	Inverse variance weighted	5	0.00230197	0.000325041	1.41984e-12	7.0821	Non-cancer illness code, self-reported: chickenpox
M0hsC1	ukb-b-14027	Non-cancer illness code, self-reported: chickenpox || id:ukb-b-14027	sphingomyelin (d18:1/25:0, d19:0/24:1, d20:1/23:0, d19:1/24:0)*	Inverse variance weighted	5	0.00109789	0.000155024	1.41984e-12	7.0821	Non-cancer illness code, self-reported: chickenpox
pTaCkE	ukb-a-249	Weight || id:ukb-a-249	octadecandienylcarnitine	Inverse variance weighted	6	-0.0726637	0.0102606	1.42304e-12	-7.08179	Weight
xVlOPC	ukb-a-25	Alcohol intake frequency. || id:ukb-a-25	furaneol sulfate	Wald ratio	1	-0.104405	0.0147692	1.55984e-12	-7.06906	Alcohol intake frequency.
s8Vv6N	ukb-a-25	Alcohol intake frequency. || id:ukb-a-25	x-12714	Wald ratio	1	0.11572	0.0163713	1.56661e-12	7.06846	Alcohol intake frequency.
BvDTkS	ukb-a-249	Weight || id:ukb-a-249	x-11593--o-methylascorbate*	Inverse variance weighted	2	-0.2161	0.0306333	1.73331e-12	-7.05441	Weight
uHuuLR	ukb-a-249	Weight || id:ukb-a-249	2-o-methylascorbic acid	Inverse variance weighted	2	-0.0239985	0.00340191	1.73331e-12	-7.05441	Weight
M0hsC1	ukb-b-14486	Non-cancer illness code, self-reported: osteoarthritis || id:ukb-b-14486	sphingomyelin (d18:1/25:0, d19:0/24:1, d20:1/23:0, d19:1/24:0)*	Inverse variance weighted	6	0.0048054	0.000682893	1.9668e-12	7.03682	Non-cancer illness code, self-reported: osteoarthritis
w2lc9q	ieu-a-12	Crohn's disease || id:ieu-a-12	acetylcarnitine (c2)	Wald ratio	1	-0.74556	0.105974	1.98779e-12	-7.03534	Crohn's disease
tGShKP	ieu-a-12	Crohn's disease || id:ieu-a-12	dihomo-linoleoylcarnitine (c20:2)*	Wald ratio	1	-0.550692	0.0782814	1.99579e-12	-7.03478	Crohn's disease
RbPheI	ieu-a-294	Inflammatory bowel disease || id:ieu-a-294	pc aa c38:4	Inverse variance weighted	9	-0.13918	0.019814	2.15069e-12	-7.02435	Inflammatory bowel disease
ypYPNn	ieu-a-1006	Mean platelet volume || id:ieu-a-1006	pc aa c32:2	Inverse variance weighted	6	-0.0262024	0.003736	2.32439e-12	-7.01349	Mean platelet volume
VYMcy8	ukb-b-18113	Non-cancer illness code, self-reported: asthma || id:ukb-b-18113	pc ae c30:1	Wald ratio	1	-0.0484779	0.0069156	2.38417e-12	-7.00994	Non-cancer illness code, self-reported: asthma
2CVIzQ	ukb-a-249	Weight || id:ukb-a-249	x-23659	Wald ratio	1	0.0692511	0.00988998	2.52058e-12	7.00215	Weight
s8Qswk	ieu-a-89	Height || id:ieu-a-89	pc ae c38:1	Wald ratio	1	-0.218069	0.0311526	2.55963e-12	-7	Height
43IJl3	ieu-a-1004	Age at menopause || id:ieu-a-1004	stearidonate (18:4n3)	Inverse variance weighted	4	0.577324	0.0824749	2.55963e-12	7	Age at menopause
wDMryM	ieu-a-1004	Age at menopause || id:ieu-a-1004	nisinate (24:6n3)	Inverse variance weighted	4	0.449409	0.0642013	2.55963e-12	7	Age at menopause
S26sfX	ieu-a-1004	Age at menopause || id:ieu-a-1004	1-oleoyl-2-eicosapentaenoyl-gpc (18:1/20:5)	Inverse variance weighted	4	0.262689	0.037527	2.55963e-12	7	Age at menopause
u4Gz6J	ieu-a-271	Mean cell haemoglobin || id:ieu-a-271	2'-deoxyuridine	Inverse variance weighted	3	-0.271507	0.0388031	2.61433e-12	-6.99704	Mean cell haemoglobin
2ep5N6	ieu-a-275	Red blood cell count || id:ieu-a-275	1,2-dilinoleoyl-gpe (18:2/18:2)*	Inverse variance weighted	3	-0.0813117	0.011621	2.61592e-12	-6.99695	Red blood cell count
2ccX6r	ieu-a-970	Ulcerative colitis || id:ieu-a-970	x-24241	Wald ratio	1	-0.819264	0.117116	2.64614e-12	-6.99534	Ulcerative colitis
CdXLbW	ieu-a-12	Crohn's disease || id:ieu-a-12	homostachydrine*	Wald ratio	1	-0.463882	0.0663274	2.67505e-12	-6.99382	Crohn's disease
FLsmWD	ukb-b-13745	Irritability || id:ukb-b-13745	pc aa c36:6	Inverse variance weighted	3	0.0748562	0.0107519	3.35067e-12	6.96217	Irritability
yKwhnv	ukb-b-14027	Non-cancer illness code, self-reported: chickenpox || id:ukb-b-14027	sphingomyelin (d18:1/21:0, d17:1/22:0, d16:1/23:0)*	Inverse variance weighted	5	0.00263004	0.000377876	3.40107e-12	6.96007	Non-cancer illness code, self-reported: chickenpox
kQOE8e	ukb-b-14027	Non-cancer illness code, self-reported: chickenpox || id:ukb-b-14027	sphingomyelin (d18:1/19:0, d19:1/18:0)*	Inverse variance weighted	5	0.00205915	0.000295852	3.40107e-12	6.96007	Non-cancer illness code, self-reported: chickenpox
d51Kgd	ieu-a-12	Crohn's disease || id:ieu-a-12	hexadecanoylcarnitine	Wald ratio	1	-0.747327	0.107377	3.40685e-12	-6.95983	Crohn's disease
A600du	ukb-a-500	Heel bone mineral density (BMD) T-score automated || id:ukb-a-500	pc aa c26:0	Inverse variance weighted	2	0.163504	0.0235396	3.76045e-12	6.9459	Heel bone mineral density (BMD) T-score automated
zgfZ8s	ieu-a-970	Ulcerative colitis || id:ieu-a-970	histidine betaine (hercynine)*	Wald ratio	1	0.79319	0.114234	3.82428e-12	6.94353	Ulcerative colitis
qKtmTE	ieu-a-294	Inflammatory bowel disease || id:ieu-a-294	beta-hydroxyisovaleroylcarnitine	Wald ratio	1	-0.566956	0.0816555	3.83143e-12	-6.94326	Inflammatory bowel disease
64eMOw	ieu-a-798	Myocardial infarction || id:ieu-a-798	sm (oh) c22:1	Inverse variance weighted	5	0.575561	0.0829186	3.8858e-12	6.94127	Myocardial infarction
Z2SbbQ	ieu-a-798	Myocardial infarction || id:ieu-a-798	sm (oh) c22:2	Inverse variance weighted	5	0.623074	0.0897637	3.8858e-12	6.94127	Myocardial infarction
5dzcey	ieu-a-798	Myocardial infarction || id:ieu-a-798	sm c24:0	Inverse variance weighted	5	0.607127	0.0874662	3.8858e-12	6.94127	Myocardial infarction
DaRI8K	ukb-a-500	Heel bone mineral density (BMD) T-score automated || id:ukb-a-500	hydroxypalmitoyl sphingomyelin (d18:1/16:0(oh))**	Inverse variance weighted	2	0.0570421	0.00822053	3.94962e-12	6.93897	Heel bone mineral density (BMD) T-score automated
bl5GIW	ieu-a-1004	Age at menopause || id:ieu-a-1004	1-palmitoyl-2-eicosapentaenoyl-gpc (16:0/20:5)	Inverse variance weighted	3	0.321219	0.046364	4.26219e-12	6.9282	Age at menopause
Bm6jSv	ieu-a-1004	Age at menopause || id:ieu-a-1004	1-dihomo-linolenoyl-gpe (20:3n3 or 6)	Inverse variance weighted	3	-0.247999	0.0357956	4.26219e-12	-6.9282	Age at menopause
NODGtq	ieu-a-275	Red blood cell count || id:ieu-a-275	1-stearoyl-2-docosahexaenoyl-gpe (18:0/22:6)*	Inverse variance weighted	3	-0.030885	0.00445787	4.26219e-12	-6.9282	Red blood cell count
pMUepz	ieu-a-275	Red blood cell count || id:ieu-a-275	1-palmitoyl-2-docosahexaenoyl-gpe (16:0/22:6)*	Inverse variance weighted	3	-0.02287	0.00330101	4.26219e-12	-6.9282	Red blood cell count
TWxt25	ieu-a-1112	Primary sclerosing cholangitis || id:ieu-a-1112	1,2-dipalmitoyl-gpc (16:0/16:0)	Wald ratio	1	1.67249	0.241611	4.44526e-12	6.92225	Primary sclerosing cholangitis
LWKVFP	ieu-a-801	Bipolar disorder || id:ieu-a-801	pc ae c34:2	Inverse variance weighted	7	0.489557	0.0708068	4.71242e-12	6.91398	Bipolar disorder
EnI8Rf	ukb-a-359	Diastolic blood pressure automated reading || id:ukb-a-359	x-11381	Inverse variance weighted	3	0.0705679	0.0102081	4.74767e-12	6.91292	Diastolic blood pressure automated reading
bl5GIW	ukb-b-18994	Miserableness || id:ukb-b-18994	1-palmitoyl-2-eicosapentaenoyl-gpc (16:0/20:5)	Inverse variance weighted	3	-0.0177591	0.00257137	4.96927e-12	-6.90645	Miserableness
IUlYa2	ukb-b-18994	Miserableness || id:ukb-b-18994	1-eicosapentaenoyl-gpc (20:5)	Inverse variance weighted	3	-0.0173769	0.00251604	4.96927e-12	-6.90645	Miserableness
Bm6jSv	ukb-b-18994	Miserableness || id:ukb-b-18994	1-dihomo-linolenoyl-gpe (20:3n3 or 6)	Inverse variance weighted	3	0.013711	0.00198524	4.96927e-12	6.90645	Miserableness
yS4t0O	ukb-b-19732	Non-cancer illness code, self-reported: hypothyroidism/myxoedema || id:ukb-b-19732	1-(1-enyl-palmitoyl)-2-linoleoyl-gpe (p-16:0/18:2)*	Inverse variance weighted	2	-0.0151852	0.00220288	5.44987e-12	-6.89334	Non-cancer illness code, self-reported: hypothyroidism/myxoedema
oi2yZK	ieu-a-89	Height || id:ieu-a-89	alpha-aminoadipic acid	Inverse variance weighted	2	0.183861	0.0267242	5.98703e-12	6.87996	Height
FYvImn	ukb-b-14177	Vascular/heart problems diagnosed by doctor: High blood pressure || id:ukb-b-14177	serine	Inverse variance weighted	5	-0.0384972	0.0055974	6.08327e-12	-6.87769	Vascular/heart problems diagnosed by doctor: High blood pressure
LnxdHc	ukb-b-18113	Non-cancer illness code, self-reported: asthma || id:ukb-b-18113	3-hydroxyoleoylcarnitine	Wald ratio	1	0.0383866	0.0055863	6.35066e-12	6.87155	Non-cancer illness code, self-reported: asthma
zr85p3	ieu-a-275	Red blood cell count || id:ieu-a-275	sm (oh) c16:1	Inverse variance weighted	10	0.0602666	0.00877107	6.37273e-12	6.87106	Red blood cell count
iCT5wr	ukb-a-363	Pulse rate || id:ukb-a-363	1-palmitoyl-2-meadoyl-gpc (16:0/20:3n9)	Wald ratio	1	-0.0886469	0.012902	6.38432e-12	-6.8708	Pulse rate
pTaCkE	ukb-b-14177	Vascular/heart problems diagnosed by doctor: High blood pressure || id:ukb-b-14177	octadecandienylcarnitine	Inverse variance weighted	6	0.0301754	0.00439974	6.96134e-12	6.85845	Vascular/heart problems diagnosed by doctor: High blood pressure
gd6GcQ	ukb-b-1668	Diagnoses - main ICD10: I25.1 Atherosclerotic heart disease || id:ukb-b-1668	pc ae c42:5	Inverse variance weighted	3	-0.0243216	0.00354971	7.29751e-12	-6.8517	Diagnoses - main ICD10: I25.1 Atherosclerotic heart disease
pIPOXX	ukb-b-1668	Diagnoses - main ICD10: I25.1 Atherosclerotic heart disease || id:ukb-b-1668	pc ae c38:6	Inverse variance weighted	3	-0.0167084	0.00243857	7.29751e-12	-6.8517	Diagnoses - main ICD10: I25.1 Atherosclerotic heart disease
tGShKP	ieu-a-294	Inflammatory bowel disease || id:ieu-a-294	dihomo-linoleoylcarnitine (c20:2)*	Wald ratio	1	-0.440853	0.0644121	7.68758e-12	-6.84425	Inflammatory bowel disease
S26sfX	ukb-a-337	Forced expiratory volume in 1-second (FEV1) || id:ukb-a-337	1-oleoyl-2-eicosapentaenoyl-gpc (18:1/20:5)	Inverse variance weighted	4	0.0288558	0.00421978	8.01728e-12	6.83824	Forced expiratory volume in 1-second (FEV1)
ZZdgkE	ieu-a-294	Inflammatory bowel disease || id:ieu-a-294	propionylcarnitine (c3)	Wald ratio	1	-0.538512	0.0787527	8.02967e-12	-6.83802	Inflammatory bowel disease
5WEKgE	ieu-a-965	Lung adenocarcinoma || id:ieu-a-965	pc ae c36:3	Inverse variance weighted	8	-0.318989	0.0467199	8.62894e-12	-6.8277	Lung adenocarcinoma
ypYPNn	ieu-a-996	Eczema || id:ieu-a-996	pc aa c32:2	Inverse variance weighted	6	0.476459	0.0698385	8.95993e-12	6.82229	Eczema
gNkfMs	ukb-a-249	Weight || id:ukb-a-249	sm c24:1	Inverse variance weighted	7	-0.0819576	0.0120214	9.25455e-12	-6.81764	Weight
rUAE8f	ukb-b-7872	Mouth/teeth dental problems: Bleeding gums || id:ukb-b-7872	2-palmitoyl-gpc (16:0)*	Inverse variance weighted	5	0.018646	0.00274583	1.11626e-11	6.79065	Mouth/teeth dental problems: Bleeding gums
XepNL9	ukb-b-7872	Mouth/teeth dental problems: Bleeding gums || id:ukb-b-7872	stearoylcarnitine (c18)	Inverse variance weighted	5	0.0205725	0.00302954	1.11626e-11	6.79065	Mouth/teeth dental problems: Bleeding gums
CFlWE3	ukb-a-335	Sodium in urine || id:ukb-a-335	caffeine	Wald ratio	1	0.260641	0.0384256	1.17714e-11	6.78299	Sodium in urine
ypYPNn	ieu-a-275	Red blood cell count || id:ieu-a-275	pc aa c32:2	Inverse variance weighted	6	0.0627272	0.00925269	1.2072e-11	6.77935	Red blood cell count
Ik0VgZ	ieu-a-1126	Breast cancer (Combined Oncoarray; iCOGS; GWAS meta analysis) || id:ieu-a-1126	margaroylcarnitine (c17)*	Inverse variance weighted	2	-0.293136	0.0432703	1.24803e-11	-6.77454	Breast cancer (Combined Oncoarray; iCOGS; GWAS meta analysis)
pCZJ7N	ieu-a-1126	Breast cancer (Combined Oncoarray; iCOGS; GWAS meta analysis) || id:ieu-a-1126	linoleoylcarnitine (c18:2)*	Inverse variance weighted	2	-0.237623	0.0350759	1.24803e-11	-6.77454	Breast cancer (Combined Oncoarray; iCOGS; GWAS meta analysis)
rHGF9e	ieu-a-294	Inflammatory bowel disease || id:ieu-a-294	ergothioneine	Wald ratio	1	0.464488	0.0686668	1.3388e-11	6.76438	Inflammatory bowel disease
a5vBG5	ukb-b-13731	Diagnoses - main ICD10: K22.1 Ulcer of oesophagus || id:ukb-b-13731	x-11905	Inverse variance weighted	4	-0.00120281	0.000178109	1.44583e-11	-6.75324	Diagnoses - main ICD10: K22.1 Ulcer of oesophagus
Pan0Io	ukb-b-13731	Diagnoses - main ICD10: K22.1 Ulcer of oesophagus || id:ukb-b-13731	x-11538	Inverse variance weighted	4	-0.00133816	0.000198151	1.44583e-11	-6.75324	Diagnoses - main ICD10: K22.1 Ulcer of oesophagus
MQocaT	ukb-b-13731	Diagnoses - main ICD10: K22.1 Ulcer of oesophagus || id:ukb-b-13731	eicosanedioate (c20-dc)	Inverse variance weighted	4	-0.00493811	0.000731222	1.44583e-11	-6.75324	Diagnoses - main ICD10: K22.1 Ulcer of oesophagus
hOEhTk	ieu-a-294	Inflammatory bowel disease || id:ieu-a-294	5-methyluridine (ribothymidine)	Inverse variance weighted	2	0.150887	0.0223686	1.5249e-11	6.74551	Inflammatory bowel disease
oLLP50	ieu-a-294	Inflammatory bowel disease || id:ieu-a-294	uridine	Inverse variance weighted	2	0.354539	0.0525593	1.5249e-11	6.74551	Inflammatory bowel disease
bl5GIW	ukb-b-12040	Non-cancer illness code, self-reported: deep venous thrombosis (dvt) || id:ukb-b-12040	1-palmitoyl-2-eicosapentaenoyl-gpc (16:0/20:5)	Inverse variance weighted	3	0.00491634	0.000729536	1.59477e-11	6.739	Non-cancer illness code, self-reported: deep venous thrombosis (dvt)
IUlYa2	ukb-b-12040	Non-cancer illness code, self-reported: deep venous thrombosis (dvt) || id:ukb-b-12040	1-eicosapentaenoyl-gpc (20:5)	Inverse variance weighted	3	0.00481055	0.000713837	1.59477e-11	6.739	Non-cancer illness code, self-reported: deep venous thrombosis (dvt)
Bm6jSv	ukb-b-12040	Non-cancer illness code, self-reported: deep venous thrombosis (dvt) || id:ukb-b-12040	1-dihomo-linolenoyl-gpe (20:3n3 or 6)	Inverse variance weighted	3	-0.00379569	0.000563241	1.59477e-11	-6.739	Non-cancer illness code, self-reported: deep venous thrombosis (dvt)
FLsmWD	ieu-a-89	Height || id:ieu-a-89	pc aa c36:6	Inverse variance weighted	3	0.227519	0.0337778	1.63083e-11	6.73575	Height
91mfpv	ieu-a-89	Height || id:ieu-a-89	1-myristoyl-2-arachidonoyl-gpc (14:0/20:4)*	Inverse variance weighted	3	0.103787	0.0154083	1.63083e-11	6.73575	Height
2180Ty	ieu-a-996	Eczema || id:ieu-a-996	pc aa c38:0	Inverse variance weighted	3	-0.656417	0.0974594	1.63611e-11	-6.73528	Eczema
BqPVj4	ukb-a-363	Pulse rate || id:ukb-a-363	sphingomyelin (d18:2/14:0, d18:1/14:1)*	Wald ratio	1	-0.315224	0.0468626	1.73726e-11	-6.72656	Pulse rate
YupmYX	ukb-b-18113	Non-cancer illness code, self-reported: asthma || id:ukb-b-18113	pc ae c38:3	Wald ratio	1	-0.0350918	0.00522297	1.83302e-11	-6.71874	Non-cancer illness code, self-reported: asthma
ypYPNn	ukb-b-12040	Non-cancer illness code, self-reported: deep venous thrombosis (dvt) || id:ukb-b-12040	pc aa c32:2	Inverse variance weighted	6	-0.0077807	0.00115989	1.97121e-11	-6.70814	Non-cancer illness code, self-reported: deep venous thrombosis (dvt)
gCKTZB	ieu-a-7	Coronary heart disease || id:ieu-a-7	1-oleoyl-2-arachidonoyl-gpe (18:1/20:4)*	Inverse variance weighted	6	0.119616	0.0178315	1.9714e-11	6.70813	Coronary heart disease
ypYPNn	ukb-b-6458	Mouth/teeth dental problems: Mouth ulcers || id:ukb-b-6458	pc aa c32:2	Inverse variance weighted	6	0.0150898	0.00225144	2.05175e-11	6.70229	Mouth/teeth dental problems: Mouth ulcers
d51Kgd	ieu-a-294	Inflammatory bowel disease || id:ieu-a-294	hexadecanoylcarnitine	Wald ratio	1	-0.592151	0.0883511	2.05227e-11	-6.70226	Inflammatory bowel disease
oLOab5	ieu-a-275	Red blood cell count || id:ieu-a-275	glycosyl ceramide (d18:1/20:0, d16:1/22:0)*	Inverse variance weighted	7	0.0491675	0.00734324	2.14773e-11	6.69561	Red blood cell count
S26sfX	ieu-a-833	Rheumatoid arthritis || id:ieu-a-833	1-oleoyl-2-eicosapentaenoyl-gpc (18:1/20:5)	Inverse variance weighted	4	0.183095	0.0273594	2.1983e-11	6.69221	Rheumatoid arthritis
x5m7XF	ukb-b-17241	Blood clot, DVT, bronchitis, emphysema, asthma, rhinitis, eczema, allergy diagnosed by doctor: Hayfever, allergic rhinitis or eczema || id:ukb-b-17241	x-26109	Inverse variance weighted	3	-0.00738128	0.00110623	2.51537e-11	-6.67247	Blood clot, DVT, bronchitis, emphysema, asthma, rhinitis, eczema, allergy diagnosed by doctor: Hayfever, allergic rhinitis or eczema
2ep5N6	ieu-a-274	Packed cell volume || id:ieu-a-274	1,2-dilinoleoyl-gpe (18:2/18:2)*	Inverse variance weighted	3	-0.637171	0.0957746	2.87525e-11	-6.65282	Packed cell volume
G21Fp2	ukb-b-1668	Diagnoses - main ICD10: I25.1 Atherosclerotic heart disease || id:ukb-b-1668	1-(1-enyl-palmitoyl)-2-linoleoyl-gpc (p-16:0/18:2)*	Inverse variance weighted	3	-0.0119004	0.00178968	2.94126e-11	-6.64948	Diagnoses - main ICD10: I25.1 Atherosclerotic heart disease
Qcet3h	ukb-b-1668	Diagnoses - main ICD10: I25.1 Atherosclerotic heart disease || id:ukb-b-1668	1-(1-enyl-palmitoyl)-2-palmitoleoyl-gpc (p-16:0/16:1)*	Inverse variance weighted	3	-0.0109142	0.00164136	2.94126e-11	-6.64948	Diagnoses - main ICD10: I25.1 Atherosclerotic heart disease
31FVwJ	ukb-b-13251	Non-cancer illness code, self-reported: gout || id:ukb-b-13251	pc ae c38:0	Inverse variance weighted	7	-0.00792961	0.0011937	3.07659e-11	-6.64286	Non-cancer illness code, self-reported: gout
XepNL9	ukb-b-10093	Tense / 'highly strung' || id:ukb-b-10093	stearoylcarnitine (c18)	Inverse variance weighted	5	0.0229439	0.00345701	3.20285e-11	6.63693	Tense / 'highly strung'
91mfpv	ukb-a-336	Forced vital capacity (FVC) || id:ukb-a-336	1-myristoyl-2-arachidonoyl-gpc (14:0/20:4)*	Inverse variance weighted	3	0.0706002	0.0106427	3.27368e-11	6.6337	Forced vital capacity (FVC)
pMUepz	ieu-a-274	Packed cell volume || id:ieu-a-274	1-palmitoyl-2-docosahexaenoyl-gpe (16:0/22:6)*	Inverse variance weighted	3	-0.177989	0.0268386	3.31596e-11	-6.63181	Packed cell volume
asDsn2	ukb-b-13745	Irritability || id:ukb-b-13745	lysopc a c24:0	Inverse variance weighted	2	-0.0347205	0.00524814	3.69621e-11	-6.61577	Irritability
INxudw	ukb-b-13745	Irritability || id:ukb-b-13745	pc aa c30:0	Inverse variance weighted	2	-0.0605684	0.00915516	3.69621e-11	-6.61577	Irritability
viIDke	ukb-b-10093	Tense / 'highly strung' || id:ukb-b-10093	2-hydroxysebacate	Inverse variance weighted	5	0.0144305	0.00218123	3.69689e-11	6.61574	Tense / 'highly strung'
6GuPUp	ukb-b-10093	Tense / 'highly strung' || id:ukb-b-10093	x-18913	Inverse variance weighted	5	0.0184662	0.00279124	3.69689e-11	6.61574	Tense / 'highly strung'
2180Ty	ieu-a-89	Height || id:ieu-a-89	pc aa c38:0	Inverse variance weighted	3	0.115865	0.017526	3.81587e-11	6.61106	Height
gCKTZB	ieu-a-798	Myocardial infarction || id:ieu-a-798	1-oleoyl-2-arachidonoyl-gpe (18:1/20:4)*	Inverse variance weighted	6	0.131917	0.0199753	4.00222e-11	6.604	Myocardial infarction
AJO4EV	ukb-a-500	Heel bone mineral density (BMD) T-score automated || id:ukb-a-500	pc aa c38:5	Inverse variance weighted	9	-0.0849718	0.0128707	4.05781e-11	-6.60195	Heel bone mineral density (BMD) T-score automated
43IJl3	ukb-b-18994	Miserableness || id:ukb-b-18994	stearidonate (18:4n3)	Inverse variance weighted	4	-0.0292666	0.00443327	4.06836e-11	-6.60157	Miserableness
DVBQgr	ieu-a-996	Eczema || id:ieu-a-996	1-palmitoyl-2-arachidonoyl-gpe (16:0/20:4)*	Inverse variance weighted	5	-0.417354	0.0632304	4.09707e-11	-6.60052	Eczema
BucRJO	ieu-a-89	Height || id:ieu-a-89	sphingomyelin (d17:1/16:0, d18:1/15:0, d16:1/17:0)*	Inverse variance weighted	2	0.148903	0.0225621	4.12093e-11	6.59966	Height
yN4trk	ieu-a-89	Height || id:ieu-a-89	1-(1-enyl-palmitoyl)-2-oleoyl-gpc (p-16:0/18:1)*	Inverse variance weighted	2	0.148657	0.0225249	4.12093e-11	6.59966	Height
cUjbYG	ukb-b-18113	Non-cancer illness code, self-reported: asthma || id:ukb-b-18113	octadecenoylcarnitine	Inverse variance weighted	2	0.0298294	0.00452881	4.5009e-11	6.58657	Non-cancer illness code, self-reported: asthma
64eMOw	ukb-a-25	Alcohol intake frequency. || id:ukb-a-25	sm (oh) c22:1	Inverse variance weighted	5	-0.144957	0.0220337	4.74079e-11	-6.57886	Alcohol intake frequency.
5dzcey	ukb-a-249	Weight || id:ukb-a-249	sm c24:0	Inverse variance weighted	5	-0.0912807	0.0138812	4.83753e-11	-6.57585	Weight
S26sfX	ieu-a-965	Lung adenocarcinoma || id:ieu-a-965	1-oleoyl-2-eicosapentaenoyl-gpc (18:1/20:5)	Inverse variance weighted	4	0.337021	0.0512525	4.84253e-11	6.5757	Lung adenocarcinoma
VblkCL	ukb-b-17241	Blood clot, DVT, bronchitis, emphysema, asthma, rhinitis, eczema, allergy diagnosed by doctor: Hayfever, allergic rhinitis or eczema || id:ukb-b-17241	butyrate/isobutyrate (4:0)	Inverse variance weighted	2	-0.0363012	0.00552333	4.9531e-11	-6.57234	Blood clot, DVT, bronchitis, emphysema, asthma, rhinitis, eczema, allergy diagnosed by doctor: Hayfever, allergic rhinitis or eczema
bl5GIW	ukb-b-4637	Diagnoses - main ICD10: H00.1 Chalazion || id:ukb-b-4637	1-palmitoyl-2-eicosapentaenoyl-gpc (16:0/20:5)	Inverse variance weighted	3	0.0019789	0.000301334	5.12914e-11	6.56714	Diagnoses - main ICD10: H00.1 Chalazion
IUlYa2	ukb-b-4637	Diagnoses - main ICD10: H00.1 Chalazion || id:ukb-b-4637	1-eicosapentaenoyl-gpc (20:5)	Inverse variance weighted	3	0.00193632	0.000294849	5.12914e-11	6.56714	Diagnoses - main ICD10: H00.1 Chalazion
Bm6jSv	ukb-b-4637	Diagnoses - main ICD10: H00.1 Chalazion || id:ukb-b-4637	1-dihomo-linolenoyl-gpe (20:3n3 or 6)	Inverse variance weighted	3	-0.00152782	0.000232646	5.12914e-11	-6.56714	Diagnoses - main ICD10: H00.1 Chalazion
RsY1JX	ukb-a-248	Body mass index (BMI) || id:ukb-a-248	x-18249	Inverse variance weighted	2	-0.0351812	0.00535887	5.20185e-11	-6.56504	Body mass index (BMI)
330vaa	ukb-a-248	Body mass index (BMI) || id:ukb-a-248	x-18914	Inverse variance weighted	2	-0.030187	0.00459815	5.20185e-11	-6.56504	Body mass index (BMI)
TkODoW	ieu-a-1108	Ischemic stroke || id:ieu-a-1108	decenoylcarnitine	Inverse variance weighted	10	0.298049	0.0454663	5.5502e-11	6.55538	Ischemic stroke
91mfpv	ukb-a-249	Weight || id:ukb-a-249	1-myristoyl-2-arachidonoyl-gpc (14:0/20:4)*	Inverse variance weighted	3	0.0749083	0.011451	6.08518e-11	6.54163	Weight
8ZeTDJ	ukb-a-248	Body mass index (BMI) || id:ukb-a-248	n-acetylputrescine	Inverse variance weighted	2	-0.0983513	0.0150348	6.08776e-11	-6.54157	Body mass index (BMI)
5WEKgE	ieu-a-977	Forearm bone mineral density || id:ieu-a-977	pc ae c36:3	Inverse variance weighted	8	0.188192	0.0287689	6.09095e-11	6.54149	Forearm bone mineral density
bl5GIW	ukb-b-11411	Blood clot, DVT, bronchitis, emphysema, asthma, rhinitis, eczema, allergy diagnosed by doctor: Blood clot in the leg (DVT) || id:ukb-b-11411	1-palmitoyl-2-eicosapentaenoyl-gpc (16:0/20:5)	Inverse variance weighted	3	0.00482765	0.000738653	6.32948e-11	6.53574	Blood clot, DVT, bronchitis, emphysema, asthma, rhinitis, eczema, allergy diagnosed by doctor: Blood clot in the leg (DVT)
2180Ty	ukb-a-359	Diastolic blood pressure automated reading || id:ukb-a-359	pc aa c38:0	Inverse variance weighted	3	-0.0917998	0.0140528	6.4676e-11	-6.53251	Diastolic blood pressure automated reading
xKlnpj	ukb-a-248	Body mass index (BMI) || id:ukb-a-248	1-(1-enyl-stearoyl)-2-oleoyl-gpe (p-18:0/18:1)	Inverse variance weighted	2	0.105453	0.0161609	6.79142e-11	6.52519	Body mass index (BMI)
Nczq90	ukb-a-337	Forced expiratory volume in 1-second (FEV1) || id:ukb-a-337	x-24071	Inverse variance weighted	3	-0.0261317	0.00400887	7.10187e-11	-6.51849	Forced expiratory volume in 1-second (FEV1)
B9a5pb	ieu-a-271	Mean cell haemoglobin || id:ieu-a-271	x-12112	Inverse variance weighted	7	-0.0269937	0.00414612	7.4857e-11	-6.51059	Mean cell haemoglobin
cewuNi	ieu-a-970	Ulcerative colitis || id:ieu-a-970	dodecanoylcarnitine	Inverse variance weighted	3	-0.881086	0.135332	7.4872e-11	-6.51056	Ulcerative colitis
0VU7DP	ukb-b-17241	Blood clot, DVT, bronchitis, emphysema, asthma, rhinitis, eczema, allergy diagnosed by doctor: Hayfever, allergic rhinitis or eczema || id:ukb-b-17241	butyrylglycine	Inverse variance weighted	2	-0.00818745	0.00126038	8.2487e-11	-6.49599	Blood clot, DVT, bronchitis, emphysema, asthma, rhinitis, eczema, allergy diagnosed by doctor: Hayfever, allergic rhinitis or eczema
LWKVFP	ieu-a-977	Forearm bone mineral density || id:ieu-a-977	pc ae c34:2	Inverse variance weighted	7	0.306835	0.047238	8.27522e-11	6.49551	Forearm bone mineral density
uHuuLR	ukb-b-14177	Vascular/heart problems diagnosed by doctor: High blood pressure || id:ukb-b-14177	2-o-methylascorbic acid	Inverse variance weighted	2	-0.00947028	0.00145975	8.72103e-11	-6.48761	Vascular/heart problems diagnosed by doctor: High blood pressure
O2ZYf7	ukb-b-20078	Non-cancer illness code, self-reported: gastric/stomach ulcers || id:ukb-b-20078	dodecenedioate (c12:1-dc)*	Inverse variance weighted	6	0.00261254	0.000402728	8.75045e-11	6.4871	Non-cancer illness code, self-reported: gastric/stomach ulcers
oJZ87S	ukb-b-8777	Cancer code, self-reported: cervical cancer || id:ukb-b-8777	n-acetyl-2-aminoadipate	Inverse variance weighted	3	0.00149391	0.000230326	8.80919e-11	6.48609	Cancer code, self-reported: cervical cancer
3HuuGR	ukb-b-8777	Cancer code, self-reported: cervical cancer || id:ukb-b-8777	2-aminooctanoate	Inverse variance weighted	3	-0.00110387	0.00017019	8.80919e-11	-6.48609	Cancer code, self-reported: cervical cancer
l5hheq	ukb-b-9536	Diagnoses - main ICD10: D25.9 Leiomyoma of uterus, unspecified || id:ukb-b-9536	pc ae c36:2	Inverse variance weighted	8	0.00420747	0.000648775	8.8579e-11	6.48526	Diagnoses - main ICD10: D25.9 Leiomyoma of uterus, unspecified
JDcypK	ieu-a-271	Mean cell haemoglobin || id:ieu-a-271	5-acetylamino-6-amino-3-methyluracil	Inverse variance weighted	3	0.424775	0.0655885	9.39593e-11	6.47636	Mean cell haemoglobin
0Q9zX1	ieu-a-271	Mean cell haemoglobin || id:ieu-a-271	5-hydroxy-2-methylpyridine sulfate	Inverse variance weighted	3	0.430646	0.066495	9.39593e-11	6.47636	Mean cell haemoglobin
l34vPv	ukb-b-19732	Non-cancer illness code, self-reported: hypothyroidism/myxoedema || id:ukb-b-19732	sphingomyelin (d18:1/20:2, d18:2/20:1, d16:1/22:2)*	Inverse variance weighted	2	-0.014232	0.00219826	9.53006e-11	-6.47422	Non-cancer illness code, self-reported: hypothyroidism/myxoedema
P4cBhG	ieu-a-1102	Chronic kidney disease || id:ieu-a-1102	creatinine	Inverse variance weighted	16	1.87241	0.289258	9.59648e-11	6.47317	Chronic kidney disease
HKgzs7	ieu-a-1050	Ferritin || id:ieu-a-1050	valine	Inverse variance weighted	6	0.379007	0.0586119	1.00375e-10	6.46639	Ferritin
cewuNi	ieu-a-1006	Mean platelet volume || id:ieu-a-1006	dodecanoylcarnitine	Inverse variance weighted	3	-0.0706897	0.0109497	1.0763e-10	-6.45583	Mean platelet volume
yK15mu	ukb-a-336	Forced vital capacity (FVC) || id:ukb-a-336	sm c18:1	Inverse variance weighted	6	0.0521053	0.00807174	1.08017e-10	6.45528	Forced vital capacity (FVC)
biD8xJ	ieu-a-965	Lung adenocarcinoma || id:ieu-a-965	pc aa c36:3	Inverse variance weighted	11	-0.390777	0.0605371	1.08096e-10	-6.45517	Lung adenocarcinoma
a5vBG5	ieu-a-89	Height || id:ieu-a-89	x-11905	Inverse variance weighted	4	-0.0180367	0.00279753	1.13809e-10	-6.44737	Height
Pan0Io	ieu-a-89	Height || id:ieu-a-89	x-11538	Inverse variance weighted	4	-0.0200664	0.00311234	1.13809e-10	-6.44737	Height
MQocaT	ieu-a-89	Height || id:ieu-a-89	eicosanedioate (c20-dc)	Inverse variance weighted	4	-0.0740494	0.0114852	1.13809e-10	-6.44737	Height
S26sfX	ukb-a-359	Diastolic blood pressure automated reading || id:ukb-a-359	1-oleoyl-2-eicosapentaenoyl-gpc (18:1/20:5)	Inverse variance weighted	4	-0.0321827	0.00499371	1.15871e-10	-6.44465	Diastolic blood pressure automated reading
7byy5c	ukb-a-336	Forced vital capacity (FVC) || id:ukb-a-336	isobutyrylcarnitine (c4)	Inverse variance weighted	7	-0.0477208	0.00740519	1.16188e-10	-6.44423	Forced vital capacity (FVC)
bnD2Ym	ukb-a-500	Heel bone mineral density (BMD) T-score automated || id:ukb-a-500	1-palmitoyl-2-alpha-linolenoyl-gpc (16:0/18:3n3)	Inverse variance weighted	2	0.0423717	0.00657665	1.17323e-10	6.44276	Heel bone mineral density (BMD) T-score automated
cbOJvS	ukb-b-1668	Diagnoses - main ICD10: I25.1 Atherosclerotic heart disease || id:ukb-b-1668	1-oleoyl-2-linoleoyl-gpe (18:1/18:2)*	Inverse variance weighted	4	0.00456074	0.000708373	1.20795e-10	6.43833	Diagnoses - main ICD10: I25.1 Atherosclerotic heart disease
jtOEg4	ukb-b-1668	Diagnoses - main ICD10: I25.1 Atherosclerotic heart disease || id:ukb-b-1668	1-palmitoyl-2-linoleoyl-gpe (16:0/18:2)	Inverse variance weighted	4	0.00330978	0.000514074	1.20795e-10	6.43833	Diagnoses - main ICD10: I25.1 Atherosclerotic heart disease
xKlnpj	ukb-b-12040	Non-cancer illness code, self-reported: deep venous thrombosis (dvt) || id:ukb-b-12040	1-(1-enyl-stearoyl)-2-oleoyl-gpe (p-18:0/18:1)	Inverse variance weighted	2	0.0126342	0.00196269	1.21721e-10	6.43717	Non-cancer illness code, self-reported: deep venous thrombosis (dvt)
dVokOy	ukb-b-10753	Diabetes diagnosed by doctor || id:ukb-b-10753	n-acetylcitrulline	Inverse variance weighted	5	-0.00151991	0.000236391	1.27913e-10	-6.42963	Diabetes diagnosed by doctor
hd47cc	ukb-b-10753	Diabetes diagnosed by doctor || id:ukb-b-10753	n-acetylornithine	Inverse variance weighted	5	0.0018181	0.000282769	1.27913e-10	6.42963	Diabetes diagnosed by doctor
FLrFeZ	ukb-b-14486	Non-cancer illness code, self-reported: osteoarthritis || id:ukb-b-14486	sphingomyelin (d18:0/18:0, d19:0/17:0)*	Inverse variance weighted	4	0.0144162	0.00224348	1.31165e-10	6.42581	Non-cancer illness code, self-reported: osteoarthritis
wDMryM	ieu-a-833	Rheumatoid arthritis || id:ieu-a-833	nisinate (24:6n3)	Inverse variance weighted	4	0.251802	0.0391891	1.31606e-10	6.4253	Rheumatoid arthritis
43IJl3	ieu-a-833	Rheumatoid arthritis || id:ieu-a-833	stearidonate (18:4n3)	Inverse variance weighted	4	0.323472	0.0503435	1.31606e-10	6.4253	Rheumatoid arthritis
CdXLbW	ieu-a-294	Inflammatory bowel disease || id:ieu-a-294	homostachydrine*	Wald ratio	1	-0.350029	0.0545141	1.35479e-10	-6.42089	Inflammatory bowel disease
t27zLw	ukb-a-337	Forced expiratory volume in 1-second (FEV1) || id:ukb-a-337	n-acetyl-isoputreanine	Inverse variance weighted	5	0.032949	0.00513431	1.38613e-10	6.41741	Forced expiratory volume in 1-second (FEV1)
7AtiBd	ukb-b-15251	Fracture resulting from simple fall || id:ukb-b-15251	pc ae c42:2	Inverse variance weighted	9	-0.070798	0.0110353	1.40271e-10	-6.4156	Fracture resulting from simple fall
f3DjMw	ukb-b-19732	Non-cancer illness code, self-reported: hypothyroidism/myxoedema || id:ukb-b-19732	1-oleoyl-2-dihomo-linolenoyl-gpc (18:1/20:3)	Inverse variance weighted	2	-0.00651361	0.00101529	1.40362e-10	-6.4155	Non-cancer illness code, self-reported: hypothyroidism/myxoedema
IvmgUt	ukb-b-19732	Non-cancer illness code, self-reported: hypothyroidism/myxoedema || id:ukb-b-19732	1-dihomo-linolenoyl-gpc (20:3n3 or 6)	Inverse variance weighted	2	-0.0069009	0.00107566	1.40362e-10	-6.4155	Non-cancer illness code, self-reported: hypothyroidism/myxoedema
7AtiBd	ukb-b-10555	Diagnoses - secondary ICD10: I50.1 Left ventricular failure || id:ukb-b-10555	pc ae c42:2	Inverse variance weighted	8	0.00320557	0.000499679	1.40581e-10	6.41526	Diagnoses - secondary ICD10: I50.1 Left ventricular failure
S26sfX	ukb-b-9536	Diagnoses - main ICD10: D25.9 Leiomyoma of uterus, unspecified || id:ukb-b-9536	1-oleoyl-2-eicosapentaenoyl-gpc (18:1/20:5)	Inverse variance weighted	4	-0.00289168	0.000450753	1.40627e-10	-6.41521	Diagnoses - main ICD10: D25.9 Leiomyoma of uterus, unspecified
TTnewX	ukb-b-15622	Non-cancer illness code, self-reported: tuberculosis (tb) || id:ukb-b-15622	5alpha-androstan-3alpha,17alpha-diol monosulfate	Inverse variance weighted	3	0.00210263	0.00032802	1.45447e-10	6.41008	Non-cancer illness code, self-reported: tuberculosis (tb)
wKhDXZ	ukb-b-15622	Non-cancer illness code, self-reported: tuberculosis (tb) || id:ukb-b-15622	deoxycholic acid glucuronide	Inverse variance weighted	3	-0.000703583	0.000109762	1.45447e-10	-6.41008	Non-cancer illness code, self-reported: tuberculosis (tb)
WOVtLu	ukb-b-15622	Non-cancer illness code, self-reported: tuberculosis (tb) || id:ukb-b-15622	x-19141	Inverse variance weighted	3	-0.000760374	0.000118622	1.45447e-10	-6.41008	Non-cancer illness code, self-reported: tuberculosis (tb)
43IJl3	ieu-a-977	Forearm bone mineral density || id:ieu-a-977	stearidonate (18:4n3)	Inverse variance weighted	4	-0.436251	0.0680583	1.45557e-10	-6.40996	Forearm bone mineral density
wDMryM	ieu-a-977	Forearm bone mineral density || id:ieu-a-977	nisinate (24:6n3)	Inverse variance weighted	4	-0.339593	0.0529789	1.45557e-10	-6.40996	Forearm bone mineral density
RZlVim	ukb-a-359	Diastolic blood pressure automated reading || id:ukb-a-359	2-hydroxyoctanoate	Inverse variance weighted	6	-0.0546036	0.00852084	1.47214e-10	-6.40823	Diastolic blood pressure automated reading
nbhiB0	ukb-b-10753	Diabetes diagnosed by doctor || id:ukb-b-10753	n-acetyl-1-methylhistidine*	Inverse variance weighted	8	-0.00162243	0.000253242	1.48767e-10	-6.40663	Diabetes diagnosed by doctor
S26sfX	ieu-a-275	Red blood cell count || id:ieu-a-275	1-oleoyl-2-eicosapentaenoyl-gpc (18:1/20:5)	Inverse variance weighted	4	-0.0300216	0.00469087	1.55377e-10	-6.4	Red blood cell count
l5hheq	ukb-b-17241	Blood clot, DVT, bronchitis, emphysema, asthma, rhinitis, eczema, allergy diagnosed by doctor: Hayfever, allergic rhinitis or eczema || id:ukb-b-17241	pc ae c36:2	Inverse variance weighted	8	-0.0162299	0.00254074	1.68232e-10	-6.38785	Blood clot, DVT, bronchitis, emphysema, asthma, rhinitis, eczema, allergy diagnosed by doctor: Hayfever, allergic rhinitis or eczema
6l7DTh	ukb-a-248	Body mass index (BMI) || id:ukb-a-248	sm c16:0	Inverse variance weighted	20	-0.06272	0.00982222	1.70814e-10	-6.38552	Body mass index (BMI)
biD8xJ	ieu-a-967	Squamous cell lung cancer || id:ieu-a-967	pc aa c36:3	Inverse variance weighted	11	-0.34628	0.0542831	1.78071e-10	-6.37915	Squamous cell lung cancer
xKlnpj	ukb-b-14177	Vascular/heart problems diagnosed by doctor: High blood pressure || id:ukb-b-14177	1-(1-enyl-stearoyl)-2-oleoyl-gpe (p-18:0/18:1)	Inverse variance weighted	2	-0.0390905	0.00614092	1.94561e-10	-6.36557	Vascular/heart problems diagnosed by doctor: High blood pressure
LnY8gC	ukb-a-500	Heel bone mineral density (BMD) T-score automated || id:ukb-a-500	pc aa c38:6	Inverse variance weighted	5	-0.122089	0.0191812	1.95275e-10	-6.36501	Heel bone mineral density (BMD) T-score automated
Ik0VgZ	ieu-a-1127	ER+ Breast cancer (Combined Oncoarray; iCOGS; GWAS meta analysis) || id:ieu-a-1127	margaroylcarnitine (c17)*	Inverse variance weighted	2	-0.328668	0.0516452	1.96616e-10	-6.36396	ER+ Breast cancer (Combined Oncoarray; iCOGS; GWAS meta analysis)
pCZJ7N	ieu-a-1127	ER+ Breast cancer (Combined Oncoarray; iCOGS; GWAS meta analysis) || id:ieu-a-1127	linoleoylcarnitine (c18:2)*	Inverse variance weighted	2	-0.266426	0.0418647	1.96616e-10	-6.36396	ER+ Breast cancer (Combined Oncoarray; iCOGS; GWAS meta analysis)
u0mbPU	ukb-b-8777	Cancer code, self-reported: cervical cancer || id:ukb-b-8777	methionine sulfone	Inverse variance weighted	4	-0.00131137	0.000206071	1.97012e-10	-6.36365	Cancer code, self-reported: cervical cancer
k7ZMmA	ukb-b-20078	Non-cancer illness code, self-reported: gastric/stomach ulcers || id:ukb-b-20078	decadienedioic acid (c10:2-dc)**	Inverse variance weighted	5	0.000772618	0.000121424	1.97873e-10	6.36298	Non-cancer illness code, self-reported: gastric/stomach ulcers
kekEHS	ukb-b-20078	Non-cancer illness code, self-reported: gastric/stomach ulcers || id:ukb-b-20078	tetradecadienedioate (c14:2-dc)*	Inverse variance weighted	5	0.0016311	0.000256342	1.97873e-10	6.36298	Non-cancer illness code, self-reported: gastric/stomach ulcers
DaRI8K	ukb-a-9	Sleep duration || id:ukb-a-9	hydroxypalmitoyl sphingomyelin (d18:1/16:0(oh))**	Inverse variance weighted	2	0.0315471	0.00495989	2.01167e-10	6.36045	Sleep duration
APGVyT	ieu-a-1004	Age at menopause || id:ieu-a-1004	docosatrienoate (22:3n6)*	Inverse variance weighted	3	0.377291	0.059408	2.14124e-10	6.35085	Age at menopause
uHuuLR	ukb-a-360	Systolic blood pressure automated reading || id:ukb-a-360	2-o-methylascorbic acid	Inverse variance weighted	2	-0.0250265	0.00394326	2.20046e-10	-6.34666	Systolic blood pressure automated reading
iCT5wr	ieu-a-1052	Transferrin || id:ieu-a-1052	1-palmitoyl-2-meadoyl-gpc (16:0/20:3n9)	Wald ratio	1	-0.197129	0.0310646	2.21281e-10	-6.34579	Transferrin
iCT5wr	ukb-b-19732	Non-cancer illness code, self-reported: hypothyroidism/myxoedema || id:ukb-b-19732	1-palmitoyl-2-meadoyl-gpc (16:0/20:3n9)	Wald ratio	1	0.00853175	0.00134516	2.25981e-10	6.34256	Non-cancer illness code, self-reported: hypothyroidism/myxoedema
hBsfNx	ukb-a-337	Forced expiratory volume in 1-second (FEV1) || id:ukb-a-337	4-androsten-3alpha,17alpha-diol monosulfate (3)	Inverse variance weighted	2	-0.0209181	0.00329957	2.30294e-10	-6.33965	Forced expiratory volume in 1-second (FEV1)
cUjbYG	ieu-a-996	Eczema || id:ieu-a-996	octadecenoylcarnitine	Inverse variance weighted	2	0.714092	0.112757	2.40447e-10	6.333	Eczema
8Z7QaZ	ukb-a-336	Forced vital capacity (FVC) || id:ukb-a-336	x-12688	Wald ratio	1	0.0354375	0.00560721	2.61586e-10	6.31999	Forced vital capacity (FVC)
ev60og	ukb-a-9	Sleep duration || id:ukb-a-9	1-palmitoleoyl-2-linoleoyl-gpc (16:1/18:2)	Inverse variance weighted	2	0.0282883	0.00447979	2.70774e-10	6.31465	Sleep duration
QuN3EB	ukb-a-9	Sleep duration || id:ukb-a-9	2-linoleoyl-gpe (18:2)	Inverse variance weighted	2	0.0315977	0.00500387	2.70774e-10	6.31465	Sleep duration
yK15mu	ukb-b-16858	Cough on most days || id:ukb-b-16858	sm c18:1	Inverse variance weighted	6	0.0373167	0.0059218	2.94635e-10	6.30158	Cough on most days
INxudw	ukb-a-500	Heel bone mineral density (BMD) T-score automated || id:ukb-a-500	pc aa c30:0	Inverse variance weighted	2	-0.187943	0.029837	2.99595e-10	-6.29899	Heel bone mineral density (BMD) T-score automated
asDsn2	ukb-a-500	Heel bone mineral density (BMD) T-score automated || id:ukb-a-500	lysopc a c24:0	Inverse variance weighted	2	-0.107737	0.0171038	2.99595e-10	-6.29899	Heel bone mineral density (BMD) T-score automated
FYvImn	ieu-a-1128	ER- Breast cancer (Combined Oncoarray; iCOGS; GWAS meta analysis) || id:ieu-a-1128	serine	Inverse variance weighted	5	0.449664	0.0714341	3.0777e-10	6.29481	ER- Breast cancer (Combined Oncoarray; iCOGS; GWAS meta analysis)
ypYPNn	ukb-a-248	Body mass index (BMI) || id:ukb-a-248	pc aa c32:2	Inverse variance weighted	6	0.0539673	0.00858282	3.2195e-10	6.28782	Body mass index (BMI)
w2lc9q	ieu-a-294	Inflammatory bowel disease || id:ieu-a-294	acetylcarnitine (c2)	Wald ratio	1	-0.548192	0.0871937	3.23533e-10	-6.28706	Inflammatory bowel disease
rUAE8f	ukb-b-1392	Type of cancer: ICD10: C61 Malignant neoplasm of prostate || id:ukb-b-1392	2-palmitoyl-gpc (16:0)*	Inverse variance weighted	5	0.00654025	0.00104129	3.36634e-10	6.28089	Type of cancer: ICD10: C61 Malignant neoplasm of prostate
QMv5JG	ukb-b-1392	Type of cancer: ICD10: C61 Malignant neoplasm of prostate || id:ukb-b-1392	1-(1-enyl-palmitoyl)-gpc (p-16:0)*	Inverse variance weighted	5	0.00638862	0.00101715	3.36634e-10	6.28089	Type of cancer: ICD10: C61 Malignant neoplasm of prostate
hBsfNx	ukb-a-336	Forced vital capacity (FVC) || id:ukb-a-336	4-androsten-3alpha,17alpha-diol monosulfate (3)	Inverse variance weighted	2	-0.0196356	0.00312846	3.4641e-10	-6.27644	Forced vital capacity (FVC)
l34vPv	ieu-a-1052	Transferrin || id:ieu-a-1052	sphingomyelin (d18:1/20:2, d18:2/20:1, d16:1/22:2)*	Wald ratio	1	0.359552	0.0573355	3.58672e-10	6.27103	Transferrin
FYvImn	ukb-b-18349	Non-cancer illness code, self-reported: benign breast lump || id:ukb-b-18349	serine	Inverse variance weighted	5	0.00429519	0.000685287	3.66353e-10	6.26773	Non-cancer illness code, self-reported: benign breast lump
t27zLw	ukb-a-336	Forced vital capacity (FVC) || id:ukb-a-336	n-acetyl-isoputreanine	Inverse variance weighted	5	0.0371303	0.00592853	3.77695e-10	6.26298	Forced vital capacity (FVC)
bWJ7db	ieu-a-1050	Ferritin || id:ieu-a-1050	leucine	Inverse variance weighted	7	0.5019	0.0801753	3.84914e-10	6.26003	Ferritin
ypYPNn	ukb-b-17241	Blood clot, DVT, bronchitis, emphysema, asthma, rhinitis, eczema, allergy diagnosed by doctor: Hayfever, allergic rhinitis or eczema || id:ukb-b-17241	pc aa c32:2	Inverse variance weighted	6	-0.0194417	0.00310746	3.93804e-10	-6.25646	Blood clot, DVT, bronchitis, emphysema, asthma, rhinitis, eczema, allergy diagnosed by doctor: Hayfever, allergic rhinitis or eczema
bl5GIW	ieu-a-966	Lung cancer || id:ieu-a-966	1-palmitoyl-2-eicosapentaenoyl-gpc (16:0/20:5)	Inverse variance weighted	3	0.263998	0.0422307	4.06978e-10	6.25133	Lung cancer
IUlYa2	ieu-a-966	Lung cancer || id:ieu-a-966	1-eicosapentaenoyl-gpc (20:5)	Inverse variance weighted	3	0.258317	0.0413219	4.06978e-10	6.25133	Lung cancer
Bm6jSv	ieu-a-966	Lung cancer || id:ieu-a-966	1-dihomo-linolenoyl-gpe (20:3n3 or 6)	Inverse variance weighted	3	-0.203821	0.0326044	4.06978e-10	-6.25133	Lung cancer
hfQrfn	ukb-b-17241	Blood clot, DVT, bronchitis, emphysema, asthma, rhinitis, eczema, allergy diagnosed by doctor: Hayfever, allergic rhinitis or eczema || id:ukb-b-17241	pc ae c38:2	Inverse variance weighted	8	-0.0134374	0.00214979	4.08939e-10	-6.25058	Blood clot, DVT, bronchitis, emphysema, asthma, rhinitis, eczema, allergy diagnosed by doctor: Hayfever, allergic rhinitis or eczema
2oML2Z	ukb-b-18994	Miserableness || id:ukb-b-18994	1-methyl-4-imidazoleacetate	Inverse variance weighted	3	-0.0108491	0.00173606	4.1238e-10	-6.24927	Miserableness
TnGjJ1	ukb-a-336	Forced vital capacity (FVC) || id:ukb-a-336	linoleoyl-arachidonoyl-glycerol (18:2/20:4) [2]*	Inverse variance weighted	6	0.0479874	0.00768055	4.15999e-10	6.2479	Forced vital capacity (FVC)
6GuPUp	ukb-a-569	Diagnoses - main ICD10: M54 Dorsalgia || id:ukb-a-569	x-18913	Inverse variance weighted	5	0.00678997	0.00108722	4.23131e-10	6.24525	Diagnoses - main ICD10: M54 Dorsalgia
ypYPNn	ukb-a-337	Forced expiratory volume in 1-second (FEV1) || id:ukb-a-337	pc aa c32:2	Inverse variance weighted	6	-0.0464043	0.00743094	4.24523e-10	-6.24473	Forced expiratory volume in 1-second (FEV1)
APGVyT	ukb-a-359	Diastolic blood pressure automated reading || id:ukb-a-359	docosatrienoate (22:3n6)*	Inverse variance weighted	3	-0.0479778	0.00768537	4.29975e-10	-6.24274	Diastolic blood pressure automated reading
l5hheq	ukb-b-16858	Cough on most days || id:ukb-b-16858	pc ae c36:2	Inverse variance weighted	8	-0.026327	0.00422466	4.61256e-10	-6.23175	Cough on most days
yK15mu	ieu-a-273	Mean cell volume || id:ieu-a-273	sm c18:1	Inverse variance weighted	6	0.791716	0.127125	4.72831e-10	6.22787	Mean cell volume
RbPheI	ukb-b-18994	Miserableness || id:ukb-b-18994	pc aa c38:4	Inverse variance weighted	20	-0.00893242	0.00143461	4.77391e-10	-6.22636	Miserableness
071Guo	ukb-b-10093	Tense / 'highly strung' || id:ukb-b-10093	tyrosine	Inverse variance weighted	10	0.0275719	0.00443244	4.95603e-10	6.22049	Tense / 'highly strung'
4JEO0C	ieu-a-270	Haemoglobin concentration || id:ieu-a-270	sphingomyelin (d18:0/20:0, d16:0/22:0)*	Inverse variance weighted	11	0.0508181	0.00818167	5.25784e-10	6.21121	Haemoglobin concentration
xs7yVe	ukb-b-8837	Cancer code, self-reported: basal cell carcinoma || id:ukb-b-8837	picolinate	Inverse variance weighted	2	-0.00606918	0.000977223	5.27702e-10	-6.21064	Cancer code, self-reported: basal cell carcinoma
VYMcy8	ukb-b-19732	Non-cancer illness code, self-reported: hypothyroidism/myxoedema || id:ukb-b-19732	pc ae c30:1	Wald ratio	1	-0.0287333	0.00462709	5.30529e-10	-6.2098	Non-cancer illness code, self-reported: hypothyroidism/myxoedema
S5i23A	ukb-b-10555	Diagnoses - secondary ICD10: I50.1 Left ventricular failure || id:ukb-b-10555	pc ae c42:3	Inverse variance weighted	10	0.0026889	0.000433024	5.31248e-10	6.20958	Diagnoses - secondary ICD10: I50.1 Left ventricular failure
biD8xJ	ukb-b-8720	Non-cancer illness code, self-reported: pernicious anaemia || id:ukb-b-8720	pc aa c36:3	Inverse variance weighted	11	-0.0014958	0.000240906	5.3297e-10	-6.20908	Non-cancer illness code, self-reported: pernicious anaemia
MInmoG	ukb-a-248	Body mass index (BMI) || id:ukb-a-248	1-(1-enyl-palmitoyl)-2-arachidonoyl-gpe (p-16:0/20:4)*	Inverse variance weighted	5	-0.0283332	0.00456324	5.33213e-10	-6.209	Body mass index (BMI)
F5oBs5	ieu-a-89	Height || id:ieu-a-89	cis-3,4-methyleneheptanoate	Inverse variance weighted	2	0.121827	0.0196219	5.34103e-10	6.20874	Height
TWxt25	ukb-a-337	Forced expiratory volume in 1-second (FEV1) || id:ukb-a-337	1,2-dipalmitoyl-gpc (16:0/16:0)	Wald ratio	1	-0.0895745	0.0144317	5.40853e-10	-6.20677	Forced expiratory volume in 1-second (FEV1)
CD1IcS	ukb-b-14177	Vascular/heart problems diagnosed by doctor: High blood pressure || id:ukb-b-14177	valylarginine	Wald ratio	1	-0.0171162	0.00275836	5.4618e-10	-6.20523	Vascular/heart problems diagnosed by doctor: High blood pressure
YupmYX	ukb-a-363	Pulse rate || id:ukb-a-363	pc ae c38:3	Wald ratio	1	0.207746	0.0334972	5.57879e-10	6.20189	Pulse rate
rzcVcK	ukb-b-20544	Nervous feelings || id:ukb-b-20544	1-(1-enyl-stearoyl)-2-linoleoyl-gpe (p-18:0/18:2)*	Inverse variance weighted	7	0.0159094	0.0025653	5.58327e-10	6.20177	Nervous feelings
LX5R3P	ukb-a-25	Alcohol intake frequency. || id:ukb-a-25	n2-acetyl,n6,n6-dimethyllysine	Inverse variance weighted	10	-0.00854135	0.00137797	5.70079e-10	-6.19849	Alcohol intake frequency.
rzcVcK	ukb-b-5712	Diagnoses - main ICD10: N95.0 Postmenopausal bleeding || id:ukb-b-5712	1-(1-enyl-stearoyl)-2-linoleoyl-gpe (p-18:0/18:2)*	Inverse variance weighted	7	0.00447072	0.000721268	5.7033e-10	6.19842	Diagnoses - main ICD10: N95.0 Postmenopausal bleeding
5WEKgE	ieu-a-1108	Ischemic stroke || id:ieu-a-1108	pc ae c36:3	Inverse variance weighted	8	-0.18366	0.0296345	5.73658e-10	-6.1975	Ischemic stroke
S1s8Er	ukb-a-337	Forced expiratory volume in 1-second (FEV1) || id:ukb-a-337	linoleoyl-arachidonoyl-glycerol (18:2/20:4) [1]*	Inverse variance weighted	6	0.0255604	0.00412492	5.7699e-10	6.19659	Forced expiratory volume in 1-second (FEV1)
LWKVFP	ieu-a-1128	ER- Breast cancer (Combined Oncoarray; iCOGS; GWAS meta analysis) || id:ieu-a-1128	pc ae c34:2	Inverse variance weighted	7	-0.212954	0.0343697	5.79193e-10	-6.19599	ER- Breast cancer (Combined Oncoarray; iCOGS; GWAS meta analysis)
cUjbYG	ieu-a-1008	Platelet count || id:ieu-a-1008	octadecenoylcarnitine	Inverse variance weighted	2	16.3228	2.637	6.02019e-10	6.1899	Platelet count
xKlnpj	ukb-a-363	Pulse rate || id:ukb-a-363	1-(1-enyl-stearoyl)-2-oleoyl-gpe (p-18:0/18:1)	Inverse variance weighted	2	0.175623	0.0284035	6.28335e-10	6.18315	Pulse rate
rzcVcK	ukb-a-359	Diastolic blood pressure automated reading || id:ukb-a-359	1-(1-enyl-stearoyl)-2-linoleoyl-gpe (p-18:0/18:2)*	Inverse variance weighted	7	0.0437784	0.00708078	6.30117e-10	6.18271	Diastolic blood pressure automated reading
hfQrfn	ukb-a-248	Body mass index (BMI) || id:ukb-a-248	pc ae c38:2	Inverse variance weighted	8	0.0366263	0.00593727	6.87783e-10	6.16887	Body mass index (BMI)
yK15mu	ukb-b-15003	Diagnoses - main ICD10: L72.0 Epidermal cyst || id:ukb-b-15003	sm c18:1	Inverse variance weighted	6	0.00332428	0.000539045	6.96053e-10	6.16698	Diagnoses - main ICD10: L72.0 Epidermal cyst
hfQrfn	ieu-a-1108	Ischemic stroke || id:ieu-a-1108	pc ae c38:2	Inverse variance weighted	8	-0.244784	0.0397568	7.41221e-10	-6.15703	Ischemic stroke
kiSFZT	ukb-a-248	Body mass index (BMI) || id:ukb-a-248	gamma-glutamylglutamine	Inverse variance weighted	3	0.0572597	0.00930001	7.41581e-10	6.15695	Body mass index (BMI)
f3DjMw	ieu-a-996	Eczema || id:ieu-a-996	1-oleoyl-2-dihomo-linolenoyl-gpc (18:1/20:3)	Inverse variance weighted	2	0.274034	0.0445118	7.44012e-10	6.15643	Eczema
l5hheq	ieu-a-967	Squamous cell lung cancer || id:ieu-a-967	pc ae c36:2	Inverse variance weighted	8	-0.470875	0.0765301	7.61258e-10	-6.1528	Squamous cell lung cancer
APGVyT	ieu-a-275	Red blood cell count || id:ieu-a-275	docosatrienoate (22:3n6)*	Inverse variance weighted	3	-0.0444359	0.00722397	7.69143e-10	-6.15117	Red blood cell count
t27zLw	ukb-a-249	Weight || id:ukb-a-249	n-acetyl-isoputreanine	Inverse variance weighted	5	0.0343549	0.00558676	7.7801e-10	6.14935	Weight
FYvImn	ukb-b-9591	Diagnoses - main ICD10: N92.1 Excessive and frequent menstruation with irregular cycle || id:ukb-b-9591	serine	Inverse variance weighted	5	0.00521068	0.000847389	7.792e-10	6.14911	Diagnoses - main ICD10: N92.1 Excessive and frequent menstruation with irregular cycle
MInmoG	ukb-b-12040	Non-cancer illness code, self-reported: deep venous thrombosis (dvt) || id:ukb-b-12040	1-(1-enyl-palmitoyl)-2-arachidonoyl-gpe (p-16:0/20:4)*	Inverse variance weighted	5	0.00339785	0.000552639	7.82647e-10	6.14841	Non-cancer illness code, self-reported: deep venous thrombosis (dvt)
wIwobu	ieu-a-970	Ulcerative colitis || id:ieu-a-970	arachidoylcarnitine (c20)*	Wald ratio	1	-0.605275	0.0984597	7.87426e-10	-6.14744	Ulcerative colitis
ypYPNn	ieu-a-270	Haemoglobin concentration || id:ieu-a-270	pc aa c32:2	Inverse variance weighted	6	0.131613	0.0214154	7.96094e-10	6.1457	Haemoglobin concentration
7byy5c	ukb-a-360	Systolic blood pressure automated reading || id:ukb-a-360	isobutyrylcarnitine (c4)	Inverse variance weighted	7	0.0519389	0.00845691	8.16958e-10	6.1416	Systolic blood pressure automated reading
nbhiB0	ukb-b-5712	Diagnoses - main ICD10: N95.0 Postmenopausal bleeding || id:ukb-b-5712	n-acetyl-1-methylhistidine*	Inverse variance weighted	8	0.000873637	0.000142371	8.44453e-10	6.13634	Diagnoses - main ICD10: N95.0 Postmenopausal bleeding
dVokOy	ukb-b-5712	Diagnoses - main ICD10: N95.0 Postmenopausal bleeding || id:ukb-b-5712	n-acetylcitrulline	Inverse variance weighted	5	0.000815319	0.000132898	8.51997e-10	6.13492	Diagnoses - main ICD10: N95.0 Postmenopausal bleeding
hd47cc	ukb-b-5712	Diagnoses - main ICD10: N95.0 Postmenopausal bleeding || id:ukb-b-5712	n-acetylornithine	Inverse variance weighted	5	-0.000975278	0.000158972	8.51997e-10	-6.13492	Diagnoses - main ICD10: N95.0 Postmenopausal bleeding
z5mkJy	ukb-a-360	Systolic blood pressure automated reading || id:ukb-a-360	x-26111	Wald ratio	1	-0.125942	0.0205471	8.81823e-10	-6.12945	Systolic blood pressure automated reading
bnD2Ym	ieu-a-996	Eczema || id:ieu-a-996	1-palmitoyl-2-alpha-linolenoyl-gpc (16:0/18:3n3)	Inverse variance weighted	2	0.225495	0.0367908	8.83792e-10	6.1291	Eczema
3n6xUq	ieu-a-1007	Neuroticism || id:ieu-a-1007	3-hydroxylaurate	Inverse variance weighted	2	-0.121381	0.0198067	8.8846e-10	-6.12826	Neuroticism
iMELqp	ukb-a-336	Forced vital capacity (FVC) || id:ukb-a-336	galactonate	Wald ratio	1	-0.118708	0.0193763	8.9868e-10	-6.12644	Forced vital capacity (FVC)
31FVwJ	ukb-b-8837	Cancer code, self-reported: basal cell carcinoma || id:ukb-b-8837	pc ae c38:0	Inverse variance weighted	7	-0.00597365	0.000975129	9.01127e-10	-6.12601	Cancer code, self-reported: basal cell carcinoma
MInmoG	ukb-a-359	Diastolic blood pressure automated reading || id:ukb-a-359	1-(1-enyl-palmitoyl)-2-arachidonoyl-gpe (p-16:0/20:4)*	Inverse variance weighted	5	-0.0286197	0.00467459	9.21794e-10	-6.12239	Diastolic blood pressure automated reading
S26sfX	ieu-a-967	Squamous cell lung cancer || id:ieu-a-967	1-oleoyl-2-eicosapentaenoyl-gpc (18:1/20:5)	Inverse variance weighted	4	0.31586	0.051594	9.23834e-10	6.12204	Squamous cell lung cancer
RbPheI	ukb-b-18113	Non-cancer illness code, self-reported: asthma || id:ukb-b-18113	pc aa c38:4	Inverse variance weighted	20	0.00945646	0.00154662	9.69882e-10	6.11429	Non-cancer illness code, self-reported: asthma
zr85p3	ukb-b-5712	Diagnoses - main ICD10: N95.0 Postmenopausal bleeding || id:ukb-b-5712	sm (oh) c16:1	Inverse variance weighted	10	-0.00550684	0.000901369	9.99978e-10	-6.10941	Diagnoses - main ICD10: N95.0 Postmenopausal bleeding
5WEKgE	ukb-b-17241	Blood clot, DVT, bronchitis, emphysema, asthma, rhinitis, eczema, allergy diagnosed by doctor: Hayfever, allergic rhinitis or eczema || id:ukb-b-17241	pc ae c36:3	Inverse variance weighted	8	-0.00969847	0.00158922	1.04315e-09	-6.10266	Blood clot, DVT, bronchitis, emphysema, asthma, rhinitis, eczema, allergy diagnosed by doctor: Hayfever, allergic rhinitis or eczema
2180Ty	ieu-a-275	Red blood cell count || id:ieu-a-275	pc aa c38:0	Inverse variance weighted	3	-0.0893175	0.0146425	1.06164e-09	-6.09986	Red blood cell count
DVBQgr	ieu-a-275	Red blood cell count || id:ieu-a-275	1-palmitoyl-2-arachidonoyl-gpe (16:0/20:4)*	Inverse variance weighted	3	-0.0674324	0.0110548	1.06164e-09	-6.09986	Red blood cell count
l5hheq	ieu-a-1108	Ischemic stroke || id:ieu-a-1108	pc ae c36:2	Inverse variance weighted	8	-0.287843	0.0472107	1.08089e-09	-6.09698	Ischemic stroke
DVBQgr	ieu-a-801	Bipolar disorder || id:ieu-a-801	1-palmitoyl-2-arachidonoyl-gpe (16:0/20:4)*	Inverse variance weighted	5	-0.529952	0.0869343	1.08755e-09	-6.096	Bipolar disorder
hfQrfn	ieu-a-1048	Thalamus volume || id:ieu-a-1048	pc ae c38:2	Inverse variance weighted	8	-94.2315	15.4586	1.08943e-09	-6.09572	Thalamus volume
Gla1pa	ukb-a-500	Heel bone mineral density (BMD) T-score automated || id:ukb-a-500	pc aa c40:3	Inverse variance weighted	2	-0.141444	0.0232118	1.10379e-09	-6.09363	Heel bone mineral density (BMD) T-score automated
TWxt25	ukb-a-360	Systolic blood pressure automated reading || id:ukb-a-360	1,2-dipalmitoyl-gpc (16:0/16:0)	Wald ratio	1	0.104018	0.0170701	1.10417e-09	6.09357	Systolic blood pressure automated reading
RsY1JX	ukb-a-249	Weight || id:ukb-a-249	x-18249	Inverse variance weighted	2	-0.0288373	0.00473372	1.11585e-09	-6.09189	Weight
APGVyT	ukb-b-8837	Cancer code, self-reported: basal cell carcinoma || id:ukb-b-8837	docosatrienoate (22:3n6)*	Inverse variance weighted	3	0.0037894	0.000622456	1.14457e-09	6.08782	Cancer code, self-reported: basal cell carcinoma
64eMOw	ukb-b-17241	Blood clot, DVT, bronchitis, emphysema, asthma, rhinitis, eczema, allergy diagnosed by doctor: Hayfever, allergic rhinitis or eczema || id:ukb-b-17241	sm (oh) c22:1	Inverse variance weighted	5	0.0329723	0.00541811	1.16076e-09	6.08557	Blood clot, DVT, bronchitis, emphysema, asthma, rhinitis, eczema, allergy diagnosed by doctor: Hayfever, allergic rhinitis or eczema
5dzcey	ukb-b-17241	Blood clot, DVT, bronchitis, emphysema, asthma, rhinitis, eczema, allergy diagnosed by doctor: Hayfever, allergic rhinitis or eczema || id:ukb-b-17241	sm c24:0	Inverse variance weighted	5	0.0347806	0.00571526	1.16076e-09	6.08557	Blood clot, DVT, bronchitis, emphysema, asthma, rhinitis, eczema, allergy diagnosed by doctor: Hayfever, allergic rhinitis or eczema
Z2SbbQ	ukb-b-17241	Blood clot, DVT, bronchitis, emphysema, asthma, rhinitis, eczema, allergy diagnosed by doctor: Hayfever, allergic rhinitis or eczema || id:ukb-b-17241	sm (oh) c22:2	Inverse variance weighted	5	0.0356942	0.00586538	1.16076e-09	6.08557	Blood clot, DVT, bronchitis, emphysema, asthma, rhinitis, eczema, allergy diagnosed by doctor: Hayfever, allergic rhinitis or eczema
ypYPNn	ukb-b-8837	Cancer code, self-reported: basal cell carcinoma || id:ukb-b-8837	pc aa c32:2	Inverse variance weighted	6	-0.00532485	0.000875489	1.18586e-09	-6.08214	Cancer code, self-reported: basal cell carcinoma
APGVyT	ukb-b-11411	Blood clot, DVT, bronchitis, emphysema, asthma, rhinitis, eczema, allergy diagnosed by doctor: Blood clot in the leg (DVT) || id:ukb-b-11411	docosatrienoate (22:3n6)*	Inverse variance weighted	3	0.0055842	0.000920054	1.28367e-09	6.06943	Blood clot, DVT, bronchitis, emphysema, asthma, rhinitis, eczema, allergy diagnosed by doctor: Blood clot in the leg (DVT)
S26sfX	ukb-a-336	Forced vital capacity (FVC) || id:ukb-a-336	1-oleoyl-2-eicosapentaenoyl-gpc (18:1/20:5)	Inverse variance weighted	4	0.0242809	0.00400098	1.28916e-09	6.06874	Forced vital capacity (FVC)
y1vKxF	ieu-a-294	Inflammatory bowel disease || id:ieu-a-294	x-12100	Wald ratio	1	0.555865	0.0915962	1.28994e-09	6.06864	Inflammatory bowel disease
APGVyT	ukb-b-12040	Non-cancer illness code, self-reported: deep venous thrombosis (dvt) || id:ukb-b-12040	docosatrienoate (22:3n6)*	Inverse variance weighted	3	0.00551258	0.00090871	1.30822e-09	6.06638	Non-cancer illness code, self-reported: deep venous thrombosis (dvt)
ypYPNn	ukb-b-16858	Cough on most days || id:ukb-b-16858	pc aa c32:2	Inverse variance weighted	6	-0.0313264	0.00516604	1.32857e-09	-6.0639	Cough on most days
1Sbv9B	ukb-a-249	Weight || id:ukb-a-249	pc aa c32:0	Inverse variance weighted	6	-0.0741266	0.0122278	1.34346e-09	-6.06211	Weight
F6Qz1v	ieu-a-89	Height || id:ieu-a-89	1,5-anhydroglucitol (1,5-ag)	Wald ratio	1	0.540541	0.0891892	1.3561e-09	6.06061	Height
cUjbYG	ukb-b-14177	Vascular/heart problems diagnosed by doctor: High blood pressure || id:ukb-b-14177	octadecenoylcarnitine	Inverse variance weighted	2	0.0377144	0.00622341	1.36054e-09	6.06008	Vascular/heart problems diagnosed by doctor: High blood pressure
WOVtLu	ukb-a-249	Weight || id:ukb-a-249	x-19141	Inverse variance weighted	3	-0.0105229	0.00173671	1.36919e-09	-6.05906	Weight
TTnewX	ukb-a-249	Weight || id:ukb-a-249	5alpha-androstan-3alpha,17alpha-diol monosulfate	Inverse variance weighted	3	0.0290984	0.00480246	1.36919e-09	6.05906	Weight
wKhDXZ	ukb-a-249	Weight || id:ukb-a-249	deoxycholic acid glucuronide	Inverse variance weighted	3	-0.00973692	0.001607	1.36919e-09	-6.05906	Weight
l5hheq	ieu-a-270	Haemoglobin concentration || id:ieu-a-270	pc ae c36:2	Inverse variance weighted	8	0.105633	0.017435	1.3724e-09	6.05868	Haemoglobin concentration
LWKVFP	ukb-b-3965	Diagnoses - main ICD10: G56.0 Carpal tunnel syndrome || id:ukb-b-3965	pc ae c34:2	Inverse variance weighted	7	-0.00500899	0.000826761	1.37337e-09	-6.05857	Diagnoses - main ICD10: G56.0 Carpal tunnel syndrome
a5vBG5	ukb-b-12040	Non-cancer illness code, self-reported: deep venous thrombosis (dvt) || id:ukb-b-12040	x-11905	Inverse variance weighted	4	-0.00180768	0.000298542	1.40408e-09	-6.05501	Non-cancer illness code, self-reported: deep venous thrombosis (dvt)
Pan0Io	ukb-b-12040	Non-cancer illness code, self-reported: deep venous thrombosis (dvt) || id:ukb-b-12040	x-11538	Inverse variance weighted	4	-0.0020111	0.000332138	1.40408e-09	-6.05501	Non-cancer illness code, self-reported: deep venous thrombosis (dvt)
MQocaT	ukb-b-12040	Non-cancer illness code, self-reported: deep venous thrombosis (dvt) || id:ukb-b-12040	eicosanedioate (c20-dc)	Inverse variance weighted	4	-0.00742139	0.00122566	1.40408e-09	-6.05501	Non-cancer illness code, self-reported: deep venous thrombosis (dvt)
u0mbPU	ieu-a-22	Schizophrenia || id:ieu-a-22	methionine sulfone	Inverse variance weighted	5	-0.116628	0.0192838	1.46685e-09	-6.04797	Schizophrenia
5WEKgE	ukb-b-3965	Diagnoses - main ICD10: G56.0 Carpal tunnel syndrome || id:ukb-b-3965	pc ae c36:3	Inverse variance weighted	8	-0.0030417	0.000503277	1.50526e-09	-6.0438	Diagnoses - main ICD10: G56.0 Carpal tunnel syndrome
S26sfX	ieu-a-801	Bipolar disorder || id:ieu-a-801	1-oleoyl-2-eicosapentaenoyl-gpc (18:1/20:5)	Inverse variance weighted	4	-0.285335	0.047284	1.59456e-09	-6.0345	Bipolar disorder
31FVwJ	ukb-b-14177	Vascular/heart problems diagnosed by doctor: High blood pressure || id:ukb-b-14177	pc ae c38:0	Inverse variance weighted	7	-0.0270432	0.0044829	1.61427e-09	-6.03252	Vascular/heart problems diagnosed by doctor: High blood pressure
yK15mu	ukb-b-13251	Non-cancer illness code, self-reported: gout || id:ukb-b-13251	sm c18:1	Inverse variance weighted	6	-0.00602398	0.000998868	1.63139e-09	-6.03081	Non-cancer illness code, self-reported: gout
W1mNxI	ieu-a-1052	Transferrin || id:ieu-a-1052	pc aa c34:2	Inverse variance weighted	5	0.324468	0.053848	1.68463e-09	6.02562	Transferrin
S26sfX	ieu-a-996	Eczema || id:ieu-a-996	1-oleoyl-2-eicosapentaenoyl-gpc (18:1/20:5)	Inverse variance weighted	4	-0.220916	0.0366669	1.69149e-09	-6.02496	Eczema
FLsmWD	ukb-a-521	Diagnoses - main ICD10: D12 Benign neoplasm of colon rectum anus and anal canal || id:ukb-a-521	pc aa c36:6	Inverse variance weighted	3	0.019475	0.00323426	1.72841e-09	6.02147	Diagnoses - main ICD10: D12 Benign neoplasm of colon rectum anus and anal canal
FYvImn	ieu-a-1047	Putamen volume || id:ieu-a-1047	serine	Inverse variance weighted	5	-229.384	38.0948	1.72918e-09	-6.0214	Putamen volume
MInmoG	ukb-b-11411	Blood clot, DVT, bronchitis, emphysema, asthma, rhinitis, eczema, allergy diagnosed by doctor: Blood clot in the leg (DVT) || id:ukb-b-11411	1-(1-enyl-palmitoyl)-2-arachidonoyl-gpe (p-16:0/20:4)*	Inverse variance weighted	5	0.00336521	0.000559542	1.80761e-09	6.01421	Blood clot, DVT, bronchitis, emphysema, asthma, rhinitis, eczema, allergy diagnosed by doctor: Blood clot in the leg (DVT)
TWxt25	ieu-a-294	Inflammatory bowel disease || id:ieu-a-294	1,2-dipalmitoyl-gpc (16:0/16:0)	Wald ratio	1	-0.419473	0.069755	1.8154e-09	-6.01352	Inflammatory bowel disease
p30GoV	ukb-a-25	Alcohol intake frequency. || id:ukb-a-25	n2-acetyl,n6-methyllysine	Inverse variance weighted	10	-0.00801269	0.00133443	1.91825e-09	-6.00458	Alcohol intake frequency.
5WEKgE	ukb-a-337	Forced expiratory volume in 1-second (FEV1) || id:ukb-a-337	pc ae c36:3	Inverse variance weighted	8	-0.022819	0.00380046	1.92206e-09	-6.00426	Forced expiratory volume in 1-second (FEV1)
ypYPNn	ukb-b-9536	Diagnoses - main ICD10: D25.9 Leiomyoma of uterus, unspecified || id:ukb-b-9536	pc aa c32:2	Inverse variance weighted	6	0.00476283	0.000793406	1.93694e-09	6.00301	Diagnoses - main ICD10: D25.9 Leiomyoma of uterus, unspecified
l5hheq	ieu-a-977	Forearm bone mineral density || id:ieu-a-977	pc ae c36:2	Inverse variance weighted	8	0.277504	0.0462333	1.94582e-09	6.00227	Forearm bone mineral density
mVFSpO	ukb-a-363	Pulse rate || id:ukb-a-363	pc ae c30:2	Wald ratio	1	-0.249936	0.0416787	2.01313e-09	-5.99674	Pulse rate
UZxTtu	ukb-b-17400	Snoring || id:ukb-b-17400	perfluorooctanesulfonate (pfos)	Inverse variance weighted	3	0.0378676	0.0063175	2.04645e-09	5.99408	Snoring
TWxt25	ukb-a-336	Forced vital capacity (FVC) || id:ukb-a-336	1,2-dipalmitoyl-gpc (16:0/16:0)	Wald ratio	1	-0.0819638	0.0136834	2.09836e-09	-5.99	Forced vital capacity (FVC)
uTenXK	ieu-a-798	Myocardial infarction || id:ieu-a-798	2-palmitoyl-gpe (16:0)	Inverse variance weighted	3	0.105268	0.0175749	2.10283e-09	5.98966	Myocardial infarction
S26sfX	ukb-b-16858	Cough on most days || id:ukb-b-16858	1-oleoyl-2-eicosapentaenoyl-gpc (18:1/20:5)	Inverse variance weighted	4	0.0175854	0.00293632	2.11206e-09	5.98895	Cough on most days
64eMOw	ukb-a-367	Happiness || id:ukb-a-367	sm (oh) c22:1	Inverse variance weighted	5	-0.110886	0.0185245	2.15142e-09	-5.98594	Happiness
5dzcey	ukb-a-367	Happiness || id:ukb-a-367	sm c24:0	Inverse variance weighted	5	-0.116968	0.0195405	2.15142e-09	-5.98594	Happiness
Z2SbbQ	ukb-a-367	Happiness || id:ukb-a-367	sm (oh) c22:2	Inverse variance weighted	5	-0.12004	0.0200537	2.15142e-09	-5.98594	Happiness
hfQrfn	ukb-b-1968	Diagnoses - main ICD10: K63.5 Polyp of colon || id:ukb-b-1968	pc ae c38:2	Inverse variance weighted	8	-0.00310978	0.000519517	2.15189e-09	-5.98591	Diagnoses - main ICD10: K63.5 Polyp of colon
2180Ty	ukb-b-11411	Blood clot, DVT, bronchitis, emphysema, asthma, rhinitis, eczema, allergy diagnosed by doctor: Blood clot in the leg (DVT) || id:ukb-b-11411	pc aa c38:0	Inverse variance weighted	3	0.0100593	0.00168169	2.20844e-09	5.98168	Blood clot, DVT, bronchitis, emphysema, asthma, rhinitis, eczema, allergy diagnosed by doctor: Blood clot in the leg (DVT)
GMXQRg	ieu-a-1183	ADHD || id:ieu-a-1183	x-11315	Inverse variance weighted	3	-0.348659	0.0583134	2.24435e-09	-5.97906	ADHD
n9Jq6X	ieu-a-1183	ADHD || id:ieu-a-1183	x-23780	Inverse variance weighted	3	0.231051	0.0386434	2.24435e-09	5.97906	ADHD
ypYPNn	ukb-b-1968	Diagnoses - main ICD10: K63.5 Polyp of colon || id:ukb-b-1968	pc aa c32:2	Inverse variance weighted	6	-0.00449014	0.000750986	2.24532e-09	-5.97899	Diagnoses - main ICD10: K63.5 Polyp of colon
l5hheq	ieu-a-23	Type 2 diabetes || id:ieu-a-23	pc ae c36:2	Inverse variance weighted	8	-0.205323	0.0343409	2.24584e-09	-5.97895	Type 2 diabetes
oLOab5	ieu-a-270	Haemoglobin concentration || id:ieu-a-270	glycosyl ceramide (d18:1/20:0, d16:1/22:0)*	Inverse variance weighted	7	0.113503	0.018997	2.30366e-09	5.9748	Haemoglobin concentration
n9Jq6X	ieu-a-965	Lung adenocarcinoma || id:ieu-a-965	x-23780	Inverse variance weighted	3	-0.435299	0.0729567	2.42338e-09	-5.96654	Lung adenocarcinoma
GMXQRg	ieu-a-965	Lung adenocarcinoma || id:ieu-a-965	x-11315	Inverse variance weighted	3	0.656871	0.110092	2.42338e-09	5.96654	Lung adenocarcinoma
hfQrfn	ieu-a-977	Forearm bone mineral density || id:ieu-a-977	pc ae c38:2	Inverse variance weighted	8	0.231762	0.0388471	2.43124e-09	5.96601	Forearm bone mineral density
m7ijSW	ukb-a-360	Systolic blood pressure automated reading || id:ukb-a-360	glutarylcarnitine (c5-dc)	Inverse variance weighted	12	0.0205613	0.00344782	2.46812e-09	5.96355	Systolic blood pressure automated reading
yKwhnv	ieu-a-1009	Subjective well being || id:ieu-a-1009	sphingomyelin (d18:1/21:0, d17:1/22:0, d16:1/23:0)*	Inverse variance weighted	5	0.0510451	0.00856053	2.47879e-09	5.96285	Subjective well being
LWKVFP	ieu-a-271	Mean cell haemoglobin || id:ieu-a-271	pc ae c34:2	Inverse variance weighted	5	-0.20095	0.0337004	2.47879e-09	-5.96285	Mean cell haemoglobin
KNvR7s	ieu-a-1009	Subjective well being || id:ieu-a-1009	n-stearoyl-sphinganine (d18:0/18:0)*	Inverse variance weighted	5	0.0698245	0.0117099	2.47879e-09	5.96285	Subjective well being
kQOE8e	ieu-a-1009	Subjective well being || id:ieu-a-1009	sphingomyelin (d18:1/19:0, d19:1/18:0)*	Inverse variance weighted	5	0.039965	0.00670234	2.47879e-09	5.96285	Subjective well being
M0hsC1	ieu-a-1009	Subjective well being || id:ieu-a-1009	sphingomyelin (d18:1/25:0, d19:0/24:1, d20:1/23:0, d19:1/24:0)*	Inverse variance weighted	5	0.0209688	0.00351658	2.47879e-09	5.96285	Subjective well being
01Lweg	ieu-a-1009	Subjective well being || id:ieu-a-1009	myristoyl dihydrosphingomyelin (d18:0/14:0)*	Inverse variance weighted	5	0.0439657	0.00737327	2.47879e-09	5.96285	Subjective well being
bl5GIW	ukb-a-248	Body mass index (BMI) || id:ukb-a-248	1-palmitoyl-2-eicosapentaenoyl-gpc (16:0/20:5)	Inverse variance weighted	3	-0.0358607	0.00602204	2.60205e-09	-5.95492	Body mass index (BMI)
Bm6jSv	ukb-a-248	Body mass index (BMI) || id:ukb-a-248	1-dihomo-linolenoyl-gpe (20:3n3 or 6)	Inverse variance weighted	3	0.0276864	0.00464934	2.60205e-09	5.95492	Body mass index (BMI)
IUlYa2	ukb-a-248	Body mass index (BMI) || id:ukb-a-248	1-eicosapentaenoyl-gpc (20:5)	Inverse variance weighted	3	-0.0350891	0.00589245	2.60205e-09	-5.95492	Body mass index (BMI)
2180Ty	ieu-a-966	Lung cancer || id:ieu-a-966	pc aa c38:0	Inverse variance weighted	3	0.577509	0.0970003	2.62167e-09	5.95369	Lung cancer
7byy5c	ukb-b-16048	Non-cancer illness code, self-reported: pulmonary embolism +/- dvt || id:ukb-b-16048	isobutyrylcarnitine (c4)	Inverse variance weighted	7	-0.00385632	0.000647802	2.63383e-09	-5.95293	Non-cancer illness code, self-reported: pulmonary embolism +/- dvt
iMELqp	ukb-a-248	Body mass index (BMI) || id:ukb-a-248	galactonate	Wald ratio	1	0.140475	0.0236148	2.70456e-09	5.94859	Body mass index (BMI)
biD8xJ	ieu-a-1000	Depressive symptoms || id:ieu-a-1000	pc aa c36:3	Inverse variance weighted	11	0.045357	0.00762959	2.76659e-09	5.94488	Depressive symptoms
G5tcXK	ieu-a-294	Inflammatory bowel disease || id:ieu-a-294	1-stearoyl-2-linoleoyl-gpe (18:0/18:2)*	Wald ratio	1	0.21828	0.0367239	2.78471e-09	5.94381	Inflammatory bowel disease
l34vPv	ieu-a-294	Inflammatory bowel disease || id:ieu-a-294	sphingomyelin (d18:1/20:2, d18:2/20:1, d16:1/22:2)*	Wald ratio	1	0.331708	0.0558072	2.78471e-09	5.94381	Inflammatory bowel disease
B9a5pb	ieu-a-273	Mean cell volume || id:ieu-a-273	x-12112	Inverse variance weighted	7	-0.0623018	0.0104833	2.79915e-09	-5.94296	Mean cell volume
TWxt25	ukb-b-10753	Diabetes diagnosed by doctor || id:ukb-b-10753	1,2-dipalmitoyl-gpc (16:0/16:0)	Wald ratio	1	0.018356	0.00308885	2.80426e-09	5.94266	Diabetes diagnosed by doctor
hfQrfn	ukb-a-337	Forced expiratory volume in 1-second (FEV1) || id:ukb-a-337	pc ae c38:2	Inverse variance weighted	8	-0.030547	0.00514029	2.80427e-09	-5.94266	Forced expiratory volume in 1-second (FEV1)
BvDTkS	ukb-a-248	Body mass index (BMI) || id:ukb-a-248	x-11593--o-methylascorbate*	Inverse variance weighted	2	-0.205939	0.0346798	2.88018e-09	-5.93829	Body mass index (BMI)
TVHd6X	ukb-a-25	Alcohol intake frequency. || id:ukb-a-25	cys-gly, oxidized	Inverse variance weighted	3	-0.0313304	0.00527613	2.88289e-09	-5.93813	Alcohol intake frequency.
AJO4EV	ukb-a-335	Sodium in urine || id:ukb-a-335	pc aa c38:5	Inverse variance weighted	9	0.0581289	0.00979324	2.92739e-09	5.93562	Sodium in urine
5WEKgE	ieu-a-1110	Large vessel disease || id:ieu-a-1110	pc ae c36:3	Inverse variance weighted	8	-0.383001	0.0646028	3.05625e-09	-5.92855	Large vessel disease
YupmYX	ukb-b-19732	Non-cancer illness code, self-reported: hypothyroidism/myxoedema || id:ukb-b-19732	pc ae c38:3	Wald ratio	1	-0.0207116	0.00349459	3.08964e-09	-5.92676	Non-cancer illness code, self-reported: hypothyroidism/myxoedema
6l7DTh	ieu-a-7	Coronary heart disease || id:ieu-a-7	sm c16:0	Inverse variance weighted	20	0.577365	0.0975309	3.22304e-09	5.91982	Coronary heart disease
k9OCte	ukb-b-12040	Non-cancer illness code, self-reported: deep venous thrombosis (dvt) || id:ukb-b-12040	taurodeoxycholic acid 3-sulfate	Inverse variance weighted	4	-0.00296077	0.000500763	3.36903e-09	-5.91253	Non-cancer illness code, self-reported: deep venous thrombosis (dvt)
l5hheq	ukb-a-337	Forced expiratory volume in 1-second (FEV1) || id:ukb-a-337	pc ae c36:2	Inverse variance weighted	8	-0.035903	0.00607524	3.42694e-09	-5.90972	Forced expiratory volume in 1-second (FEV1)
biD8xJ	ukb-b-16858	Cough on most days || id:ukb-b-16858	pc aa c36:3	Inverse variance weighted	11	-0.0180289	0.00305081	3.4307e-09	-5.90954	Cough on most days
iRMbTB	ukb-b-16868	Non-cancer illness code, self-reported: migraine || id:ukb-b-16868	1-stearoyl-2-linoleoyl-gpi (18:0/18:2)	Inverse variance weighted	3	0.00804348	0.00136123	3.44267e-09	5.90896	Non-cancer illness code, self-reported: migraine
QyXifh	ukb-b-16868	Non-cancer illness code, self-reported: migraine || id:ukb-b-16868	1-stearoyl-2-linoleoyl-gpc (18:0/18:2)*	Inverse variance weighted	3	0.0127514	0.00215797	3.44267e-09	5.90896	Non-cancer illness code, self-reported: migraine
ZTszCZ	ukb-b-16868	Non-cancer illness code, self-reported: migraine || id:ukb-b-16868	1-palmitoyl-2-linoleoyl-gpc (16:0/18:2)	Inverse variance weighted	3	0.0121063	0.0020488	3.44267e-09	5.90896	Non-cancer illness code, self-reported: migraine
ypYPNn	ukb-b-8720	Non-cancer illness code, self-reported: pernicious anaemia || id:ukb-b-8720	pc aa c32:2	Inverse variance weighted	6	-0.00241103	0.000408195	3.49316e-09	-5.90656	Non-cancer illness code, self-reported: pernicious anaemia
HKgzs7	ukb-b-14177	Vascular/heart problems diagnosed by doctor: High blood pressure || id:ukb-b-14177	valine	Inverse variance weighted	10	0.0496975	0.00841728	3.54306e-09	5.90423	Vascular/heart problems diagnosed by doctor: High blood pressure
ElDRx0	ukb-a-363	Pulse rate || id:ukb-a-363	x-12990--docosapentaenoic acid (n6-dpa)	Wald ratio	1	-0.708442	0.120035	3.59256e-09	-5.90194	Pulse rate
Bm6jSv	ukb-a-337	Forced expiratory volume in 1-second (FEV1) || id:ukb-a-337	1-dihomo-linolenoyl-gpe (20:3n3 or 6)	Inverse variance weighted	3	-0.0237451	0.00402446	3.63091e-09	-5.90019	Forced expiratory volume in 1-second (FEV1)
bl5GIW	ukb-a-337	Forced expiratory volume in 1-second (FEV1) || id:ukb-a-337	1-palmitoyl-2-eicosapentaenoyl-gpc (16:0/20:5)	Inverse variance weighted	3	0.0307557	0.00521266	3.63091e-09	5.90019	Forced expiratory volume in 1-second (FEV1)
IUlYa2	ukb-a-337	Forced expiratory volume in 1-second (FEV1) || id:ukb-a-337	1-eicosapentaenoyl-gpc (20:5)	Inverse variance weighted	3	0.0300939	0.00510049	3.63091e-09	5.90019	Forced expiratory volume in 1-second (FEV1)
9OGLOV	ieu-a-1112	Primary sclerosing cholangitis || id:ieu-a-1112	1-palmitoyl-gpg (16:0)*	Inverse variance weighted	4	-0.541156	0.0917713	3.70648e-09	-5.89679	Primary sclerosing cholangitis
HdOdve	ukb-b-19732	Non-cancer illness code, self-reported: hypothyroidism/myxoedema || id:ukb-b-19732	dihomo-linolenoylcarnitine (c20:3n3 or 6)*	Inverse variance weighted	11	-0.00663405	0.00112643	3.87486e-09	-5.88945	Non-cancer illness code, self-reported: hypothyroidism/myxoedema
ypYPNn	ieu-a-1000	Depressive symptoms || id:ieu-a-1000	pc aa c32:2	Inverse variance weighted	6	0.080003	0.0135855	3.88839e-09	5.88887	Depressive symptoms
l5hheq	ukb-b-20078	Non-cancer illness code, self-reported: gastric/stomach ulcers || id:ukb-b-20078	pc ae c36:2	Inverse variance weighted	8	0.00302314	0.000513367	3.88878e-09	5.88886	Non-cancer illness code, self-reported: gastric/stomach ulcers
l5hheq	ukb-b-1968	Diagnoses - main ICD10: K63.5 Polyp of colon || id:ukb-b-1968	pc ae c36:2	Inverse variance weighted	8	-0.00361298	0.000614087	4.01679e-09	-5.8835	Diagnoses - main ICD10: K63.5 Polyp of colon
ypYPNn	ieu-a-274	Packed cell volume || id:ieu-a-274	pc aa c32:2	Inverse variance weighted	6	0.403857	0.0686529	4.03882e-09	5.8826	Packed cell volume
l5hheq	ieu-a-274	Packed cell volume || id:ieu-a-274	pc ae c36:2	Inverse variance weighted	8	0.328253	0.0558012	4.04013e-09	5.88254	Packed cell volume
Dv8VhG	ieu-a-1102	Chronic kidney disease || id:ieu-a-1102	homoarginine	Wald ratio	1	0.281	0.04777	4.04475e-09	5.88235	Chronic kidney disease
mVFSpO	ukb-b-18113	Non-cancer illness code, self-reported: asthma || id:ukb-b-18113	pc ae c30:2	Wald ratio	1	0.0382467	0.00650293	4.06671e-09	5.88146	Non-cancer illness code, self-reported: asthma
6l7DTh	ieu-a-798	Myocardial infarction || id:ieu-a-798	sm c16:0	Inverse variance weighted	20	0.550961	0.0936859	4.07952e-09	5.88094	Myocardial infarction
LWKVFP	ieu-a-1048	Thalamus volume || id:ieu-a-1048	pc ae c34:2	Inverse variance weighted	5	-116.371	19.7985	4.15903e-09	-5.87774	Thalamus volume
yK15mu	ieu-a-801	Bipolar disorder || id:ieu-a-801	sm c18:1	Inverse variance weighted	6	-0.66111	0.112502	4.19172e-09	-5.87644	Bipolar disorder
hfQrfn	ieu-a-23	Type 2 diabetes || id:ieu-a-23	pc ae c38:2	Inverse variance weighted	8	-0.173691	0.0295702	4.25813e-09	-5.87384	Type 2 diabetes
TVHd6X	ieu-a-89	Height || id:ieu-a-89	cys-gly, oxidized	Inverse variance weighted	3	0.046304	0.00789278	4.44758e-09	5.86662	Height
5WEKgE	ieu-a-1041	Intracranial volume || id:ieu-a-1041	pc ae c36:3	Inverse variance weighted	8	20278.9	3457.45	4.48398e-09	5.86527	Intracranial volume
B9h5Rs	ukb-b-18275	Hearing difficulty/problems with background noise || id:ukb-b-18275	3-formylindole	Inverse variance weighted	5	0.0156702	0.00267281	4.55064e-09	5.86282	Hearing difficulty/problems with background noise
F7Qzlp	ukb-a-500	Heel bone mineral density (BMD) T-score automated || id:ukb-a-500	pc ae c38:4	Inverse variance weighted	3	-0.113918	0.0194336	4.57572e-09	-5.86191	Heel bone mineral density (BMD) T-score automated
hfQrfn	ieu-a-1041	Intracranial volume || id:ieu-a-1041	pc ae c38:2	Inverse variance weighted	8	27646.3	4717.07	4.60347e-09	5.86091	Intracranial volume
bl5GIW	ukb-b-8837	Cancer code, self-reported: basal cell carcinoma || id:ukb-b-8837	1-palmitoyl-2-eicosapentaenoyl-gpc (16:0/20:5)	Inverse variance weighted	3	0.00292776	0.000499723	4.6631e-09	5.85877	Cancer code, self-reported: basal cell carcinoma
ypYPNn	ieu-a-1108	Ischemic stroke || id:ieu-a-1108	pc aa c32:2	Inverse variance weighted	6	-0.338271	0.0577382	4.66477e-09	-5.85871	Ischemic stroke
aRjF5F	ieu-a-273	Mean cell volume || id:ieu-a-273	hypoxanthine	Wald ratio	1	-7.85	1.34	4.67886e-09	-5.85821	Mean cell volume
5WEKgE	ieu-a-271	Mean cell haemoglobin || id:ieu-a-271	pc ae c36:3	Inverse variance weighted	8	-0.11368	0.0194132	4.74645e-09	-5.85583	Mean cell haemoglobin
TnGjJ1	ukb-a-337	Forced expiratory volume in 1-second (FEV1) || id:ukb-a-337	linoleoyl-arachidonoyl-glycerol (18:2/20:4) [2]*	Inverse variance weighted	6	0.0395552	0.00675501	4.75081e-09	5.85567	Forced expiratory volume in 1-second (FEV1)
LWKVFP	ukb-a-337	Forced expiratory volume in 1-second (FEV1) || id:ukb-a-337	pc ae c34:2	Inverse variance weighted	7	-0.0365567	0.00624438	4.78903e-09	-5.85434	Forced expiratory volume in 1-second (FEV1)
ROJpfl	ukb-b-18994	Miserableness || id:ukb-b-18994	3-aminoisobutyrate	Inverse variance weighted	3	-0.0162087	0.00276904	4.81168e-09	-5.85356	Miserableness
dlVRO7	ieu-a-294	Inflammatory bowel disease || id:ieu-a-294	pc ae c40:5	Inverse variance weighted	3	-0.359466	0.0614135	4.82168e-09	-5.85321	Inflammatory bowel disease
7AtiBd	ieu-a-294	Inflammatory bowel disease || id:ieu-a-294	pc ae c42:2	Inverse variance weighted	3	-0.362774	0.0619786	4.82168e-09	-5.85321	Inflammatory bowel disease
hfQrfn	ieu-a-967	Squamous cell lung cancer || id:ieu-a-967	pc ae c38:2	Inverse variance weighted	8	-0.377157	0.0644374	4.82552e-09	-5.85308	Squamous cell lung cancer
ypYPNn	ukb-b-20078	Non-cancer illness code, self-reported: gastric/stomach ulcers || id:ukb-b-20078	pc aa c32:2	Inverse variance weighted	6	0.00367417	0.000627811	4.84665e-09	5.85235	Non-cancer illness code, self-reported: gastric/stomach ulcers
czPzMj	ieu-a-1050	Ferritin || id:ieu-a-1050	thioproline	Wald ratio	1	-0.578975	0.0989522	4.88439e-09	-5.85106	Ferritin
D7Ym5h	ukb-b-14486	Non-cancer illness code, self-reported: osteoarthritis || id:ukb-b-14486	sulfate of piperine metabolite c18h21no3 (3)*	Inverse variance weighted	3	-0.0169553	0.00289789	4.88919e-09	-5.8509	Non-cancer illness code, self-reported: osteoarthritis
87JuuT	ukb-b-14486	Non-cancer illness code, self-reported: osteoarthritis || id:ukb-b-14486	sulfate of piperine metabolite c18h21no3 (1)*	Inverse variance weighted	3	-0.017589	0.00300621	4.88919e-09	-5.8509	Non-cancer illness code, self-reported: osteoarthritis
UZxTtu	ukb-b-14486	Non-cancer illness code, self-reported: osteoarthritis || id:ukb-b-14486	perfluorooctanesulfonate (pfos)	Inverse variance weighted	3	-0.0208026	0.00355545	4.88919e-09	-5.8509	Non-cancer illness code, self-reported: osteoarthritis
CUf70N	ieu-a-1106	Serum cystatin C (eGFRcys) || id:ieu-a-1106	2-ketocaprylate	Inverse variance weighted	3	-0.029424	0.00502954	4.90894e-09	-5.85023	Serum cystatin C (eGFRcys)
UvZFy9	ukb-a-336	Forced vital capacity (FVC) || id:ukb-a-336	4-hydroxyphenylacetoylcarnitine	Inverse variance weighted	3	-0.0578777	0.00989778	4.98879e-09	-5.84755	Forced vital capacity (FVC)
XQtE38	ukb-a-248	Body mass index (BMI) || id:ukb-a-248	tetradecenoylcarnitine	Inverse variance weighted	10	0.0661154	0.0113081	5.01395e-09	5.84671	Body mass index (BMI)
LWKVFP	ieu-a-1108	Ischemic stroke || id:ieu-a-1108	pc ae c34:2	Inverse variance weighted	7	-0.287695	0.0492451	5.1545e-09	-5.84211	Ischemic stroke
kQOE8e	ukb-b-15251	Fracture resulting from simple fall || id:ukb-b-15251	sphingomyelin (d18:1/19:0, d19:1/18:0)*	Inverse variance weighted	5	0.0427331	0.00731527	5.16939e-09	5.84163	Fracture resulting from simple fall
yKwhnv	ukb-b-15251	Fracture resulting from simple fall || id:ukb-b-15251	sphingomyelin (d18:1/21:0, d17:1/22:0, d16:1/23:0)*	Inverse variance weighted	5	0.0545806	0.00934339	5.16939e-09	5.84163	Fracture resulting from simple fall
bdZs7r	ieu-a-1052	Transferrin || id:ieu-a-1052	pc aa c36:2	Inverse variance weighted	9	0.300725	0.0515007	5.24394e-09	5.83924	Transferrin
BqPVj4	ieu-a-294	Inflammatory bowel disease || id:ieu-a-294	sphingomyelin (d18:2/14:0, d18:1/14:1)*	Wald ratio	1	-0.620817	0.106344	5.2881e-09	-5.83784	Inflammatory bowel disease
lvJZsE	ieu-a-999	Body fat || id:ieu-a-999	1-palmitoleoyl-gpc (16:1)*	Inverse variance weighted	7	0.159741	0.0273786	5.39445e-09	5.83452	Body fat
M0hsC1	ukb-b-15251	Fracture resulting from simple fall || id:ukb-b-15251	sphingomyelin (d18:1/25:0, d19:0/24:1, d20:1/23:0, d19:1/24:0)*	Inverse variance weighted	6	0.0222035	0.00380595	5.41513e-09	5.83389	Fracture resulting from simple fall
ypYPNn	ukb-b-3965	Diagnoses - main ICD10: G56.0 Carpal tunnel syndrome || id:ukb-b-3965	pc aa c32:2	Inverse variance weighted	6	-0.005729	0.000984089	5.82788e-09	-5.82162	Diagnoses - main ICD10: G56.0 Carpal tunnel syndrome
dTGzGo	ieu-a-1127	ER+ Breast cancer (Combined Oncoarray; iCOGS; GWAS meta analysis) || id:ieu-a-1127	(n(1) + n(8))-acetylspermidine	Inverse variance weighted	5	0.0830411	0.014265	5.83859e-09	5.82132	ER+ Breast cancer (Combined Oncoarray; iCOGS; GWAS meta analysis)
QMv5JG	ieu-a-999	Body fat || id:ieu-a-999	1-(1-enyl-palmitoyl)-gpc (p-16:0)*	Inverse variance weighted	5	0.132759	0.0228095	5.87233e-09	5.82035	Body fat
B9a5pb	ieu-a-996	Eczema || id:ieu-a-996	x-12112	Inverse variance weighted	9	0.0393491	0.00676456	5.99325e-09	5.81695	Eczema
2ccX6r	ukb-b-16048	Non-cancer illness code, self-reported: pulmonary embolism +/- dvt || id:ukb-b-16048	x-24241	Inverse variance weighted	6	-0.00138164	0.000237722	6.17319e-09	-5.812	Non-cancer illness code, self-reported: pulmonary embolism +/- dvt
dTGzGo	ieu-a-89	Height || id:ieu-a-89	(n(1) + n(8))-acetylspermidine	Inverse variance weighted	5	-0.091197	0.0156984	6.27254e-09	-5.80932	Height
FYvImn	ukb-b-19732	Non-cancer illness code, self-reported: hypothyroidism/myxoedema || id:ukb-b-19732	serine	Inverse variance weighted	5	0.0158252	0.00272471	6.32097e-09	5.80804	Non-cancer illness code, self-reported: hypothyroidism/myxoedema
DVBQgr	ieu-a-273	Mean cell volume || id:ieu-a-273	1-palmitoyl-2-arachidonoyl-gpe (16:0/20:4)*	Inverse variance weighted	3	0.708469	0.121984	6.32651e-09	5.80789	Mean cell volume
2180Ty	ieu-a-273	Mean cell volume || id:ieu-a-273	pc aa c38:0	Inverse variance weighted	3	0.9384	0.161573	6.32651e-09	5.80789	Mean cell volume
Nczq90	ukb-a-334	Potassium in urine || id:ukb-a-334	x-24071	Inverse variance weighted	3	-0.0272742	0.00470081	6.55197e-09	-5.80202	Potassium in urine
cPU3Qa	ukb-a-334	Potassium in urine || id:ukb-a-334	leucylphenylalanine/isoleucylphenylalanine	Inverse variance weighted	3	-0.0150047	0.00258612	6.55197e-09	-5.80202	Potassium in urine
o6Frgy	ukb-a-334	Potassium in urine || id:ukb-a-334	prolylproline	Inverse variance weighted	3	-0.0169818	0.00292688	6.55197e-09	-5.80202	Potassium in urine
APGVyT	ieu-a-273	Mean cell volume || id:ieu-a-273	docosatrienoate (22:3n6)*	Inverse variance weighted	3	0.49244	0.0848773	6.5612e-09	5.80179	Mean cell volume
S1s8Er	ieu-a-996	Eczema || id:ieu-a-996	linoleoyl-arachidonoyl-glycerol (18:2/20:4) [1]*	Inverse variance weighted	6	-0.201283	0.0347212	6.74581e-09	-5.79713	Eczema
hfQrfn	ukb-b-16858	Cough on most days || id:ukb-b-16858	pc ae c38:2	Inverse variance weighted	8	-0.0207237	0.00357537	6.78179e-09	-5.79624	Cough on most days
S26sfX	ukb-b-20078	Non-cancer illness code, self-reported: gastric/stomach ulcers || id:ukb-b-20078	1-oleoyl-2-eicosapentaenoyl-gpc (18:1/20:5)	Inverse variance weighted	4	-0.00206645	0.000356673	6.88667e-09	-5.79367	Non-cancer illness code, self-reported: gastric/stomach ulcers
RbPheI	ukb-b-4637	Diagnoses - main ICD10: H00.1 Chalazion || id:ukb-b-4637	pc aa c38:4	Inverse variance weighted	16	0.00100506	0.000173478	6.88901e-09	5.79361	Diagnoses - main ICD10: H00.1 Chalazion
ypYPNn	ieu-a-1048	Thalamus volume || id:ieu-a-1048	pc aa c32:2	Inverse variance weighted	6	-128.322	22.155	6.95552e-09	-5.792	Thalamus volume
CFlWE3	ukb-a-334	Potassium in urine || id:ukb-a-334	caffeine	Wald ratio	1	0.22947	0.0396273	7.0091e-09	5.79071	Potassium in urine
7byy5c	ukb-a-337	Forced expiratory volume in 1-second (FEV1) || id:ukb-a-337	isobutyrylcarnitine (c4)	Inverse variance weighted	7	-0.0415011	0.00716862	7.0694e-09	-5.78927	Forced expiratory volume in 1-second (FEV1)
lqsSAm	ukb-a-248	Body mass index (BMI) || id:ukb-a-248	taurochenodeoxycholic acid 3-sulfate	Inverse variance weighted	5	0.0580089	0.0100261	7.21712e-09	5.78579	Body mass index (BMI)
XVHJCG	ieu-a-996	Eczema || id:ieu-a-996	n6,n6-dimethyllysine	Inverse variance weighted	5	0.0385233	0.00665897	7.24372e-09	5.78517	Eczema
s8Qswk	ukb-a-363	Pulse rate || id:ukb-a-363	pc ae c38:1	Wald ratio	1	0.262356	0.0453524	7.25855e-09	5.78483	Pulse rate
4JEO0C	ukb-b-13535	Non-cancer illness code, self-reported: gestational hypertension/pre-eclampsia || id:ukb-b-13535	sphingomyelin (d18:0/20:0, d16:0/22:0)*	Inverse variance weighted	11	0.00115104	0.000199299	7.67472e-09	5.77545	Non-cancer illness code, self-reported: gestational hypertension/pre-eclampsia
LWKVFP	ukb-b-17241	Blood clot, DVT, bronchitis, emphysema, asthma, rhinitis, eczema, allergy diagnosed by doctor: Hayfever, allergic rhinitis or eczema || id:ukb-b-17241	pc ae c34:2	Inverse variance weighted	7	-0.0150747	0.00261076	7.73742e-09	-5.77408	Blood clot, DVT, bronchitis, emphysema, asthma, rhinitis, eczema, allergy diagnosed by doctor: Hayfever, allergic rhinitis or eczema
5WEKgE	ieu-a-1046	Pallidum volume || id:ieu-a-1046	pc ae c36:3	Inverse variance weighted	8	-19.979	3.46012	7.73768e-09	-5.77408	Pallidum volume
1NAZBC	ieu-a-89	Height || id:ieu-a-89	x-25433	Inverse variance weighted	3	-0.0362515	0.00627894	7.76404e-09	-5.7735	Height
iRMbTB	ieu-a-89	Height || id:ieu-a-89	1-stearoyl-2-linoleoyl-gpi (18:0/18:2)	Inverse variance weighted	3	-0.0693289	0.0120081	7.76404e-09	-5.7735	Height
vmVo0s	ieu-a-89	Height || id:ieu-a-89	eicosenedioate (c20:1-dc)*	Inverse variance weighted	3	-0.0363816	0.00630148	7.76404e-09	-5.7735	Height
ZTszCZ	ieu-a-89	Height || id:ieu-a-89	1-palmitoyl-2-linoleoyl-gpc (16:0/18:2)	Inverse variance weighted	3	-0.104347	0.0180735	7.76404e-09	-5.7735	Height
QyXifh	ieu-a-89	Height || id:ieu-a-89	1-stearoyl-2-linoleoyl-gpc (18:0/18:2)*	Inverse variance weighted	3	-0.109908	0.0190366	7.76404e-09	-5.7735	Height
W1mNxI	ieu-a-89	Height || id:ieu-a-89	pc aa c34:2	Inverse variance weighted	5	-0.079121	0.013705	7.77987e-09	-5.77316	Height
53K1qO	ukb-b-12040	Non-cancer illness code, self-reported: deep venous thrombosis (dvt) || id:ukb-b-12040	n-oleoyltaurine	Inverse variance weighted	3	-0.0087211	0.00151086	7.8209e-09	-5.77227	Non-cancer illness code, self-reported: deep venous thrombosis (dvt)
9nmvGu	ukb-b-12040	Non-cancer illness code, self-reported: deep venous thrombosis (dvt) || id:ukb-b-12040	glycoursodeoxycholic acid sulfate (1)	Inverse variance weighted	3	-0.00771407	0.0013364	7.8209e-09	-5.77227	Non-cancer illness code, self-reported: deep venous thrombosis (dvt)
01Lweg	ukb-b-15251	Fracture resulting from simple fall || id:ukb-b-15251	myristoyl dihydrosphingomyelin (d18:0/14:0)*	Inverse variance weighted	5	0.0463826	0.00803547	7.82264e-09	5.77224	Fracture resulting from simple fall
KNvR7s	ukb-b-15251	Fracture resulting from simple fall || id:ukb-b-15251	n-stearoyl-sphinganine (d18:0/18:0)*	Inverse variance weighted	5	0.0736629	0.0127616	7.82264e-09	5.77224	Fracture resulting from simple fall
6l7DTh	ukb-a-367	Happiness || id:ukb-a-367	sm c16:0	Inverse variance weighted	20	-0.0408255	0.00707468	7.89681e-09	-5.77065	Happiness
2ccX6r	ieu-a-1042	Nucleus accumbens volume || id:ieu-a-1042	x-24241	Inverse variance weighted	7	-8.46941	1.46891	8.12846e-09	-5.76577	Nucleus accumbens volume
BqPVj4	ukb-b-19732	Non-cancer illness code, self-reported: hypothyroidism/myxoedema || id:ukb-b-19732	sphingomyelin (d18:2/14:0, d18:1/14:1)*	Wald ratio	1	0.0282012	0.00489207	8.1811e-09	5.76468	Non-cancer illness code, self-reported: hypothyroidism/myxoedema
BXZ8XG	ieu-a-89	Height || id:ieu-a-89	taurocholenate sulfate*	Inverse variance weighted	7	-0.0283379	0.00491688	8.24381e-09	-5.7634	Height
5WEKgE	ukb-b-9536	Diagnoses - main ICD10: D25.9 Leiomyoma of uterus, unspecified || id:ukb-b-9536	pc ae c36:3	Inverse variance weighted	8	0.00233805	0.000405759	8.30458e-09	5.76216	Diagnoses - main ICD10: D25.9 Leiomyoma of uterus, unspecified
1NAZBC	ieu-a-1112	Primary sclerosing cholangitis || id:ieu-a-1112	x-25433	Inverse variance weighted	3	-0.390022	0.0677465	8.55796e-09	-5.75708	Primary sclerosing cholangitis
vmVo0s	ieu-a-1112	Primary sclerosing cholangitis || id:ieu-a-1112	eicosenedioate (c20:1-dc)*	Inverse variance weighted	3	-0.391422	0.0679897	8.55796e-09	-5.75708	Primary sclerosing cholangitis
pCZJ7N	ukb-a-359	Diastolic blood pressure automated reading || id:ukb-a-359	linoleoylcarnitine (c18:2)*	Inverse variance weighted	2	0.0802021	0.013935	8.64187e-09	5.75544	Diastolic blood pressure automated reading
Ik0VgZ	ukb-a-359	Diastolic blood pressure automated reading || id:ukb-a-359	margaroylcarnitine (c17)*	Inverse variance weighted	2	0.098939	0.0171905	8.64187e-09	5.75544	Diastolic blood pressure automated reading
XVHJCG	ukb-a-25	Alcohol intake frequency. || id:ukb-a-25	n6,n6-dimethyllysine	Inverse variance weighted	5	-0.00826294	0.00143617	8.74301e-09	-5.75347	Alcohol intake frequency.
IUlYa2	ieu-a-275	Red blood cell count || id:ieu-a-275	1-eicosapentaenoyl-gpc (20:5)	Inverse variance weighted	3	-0.0326094	0.00567079	8.9028e-09	-5.75041	Red blood cell count
XQtE38	ukb-b-10098	Non-cancer illness code, self-reported: iron deficiency anaemia || id:ukb-b-10098	tetradecenoylcarnitine	Inverse variance weighted	10	-0.00418518	0.000727831	8.91319e-09	-5.75021	Non-cancer illness code, self-reported: iron deficiency anaemia
S1s8Er	ukb-b-12040	Non-cancer illness code, self-reported: deep venous thrombosis (dvt) || id:ukb-b-12040	linoleoyl-arachidonoyl-glycerol (18:2/20:4) [1]*	Inverse variance weighted	6	0.00332298	0.000577923	8.93117e-09	5.74987	Non-cancer illness code, self-reported: deep venous thrombosis (dvt)
S26sfX	ieu-a-273	Mean cell volume || id:ieu-a-273	1-oleoyl-2-eicosapentaenoyl-gpc (18:1/20:5)	Inverse variance weighted	4	0.313725	0.0546017	9.15391e-09	5.7457	Mean cell volume
S1s8Er	ukb-a-9	Sleep duration || id:ukb-a-9	linoleoyl-arachidonoyl-glycerol (18:2/20:4) [1]*	Inverse variance weighted	6	-0.0213785	0.00372113	9.18268e-09	-5.74517	Sleep duration
yKwhnv	ieu-a-275	Red blood cell count || id:ieu-a-275	sphingomyelin (d18:1/21:0, d17:1/22:0, d16:1/23:0)*	Inverse variance weighted	5	0.0376458	0.00656307	9.69384e-09	5.736	Red blood cell count
9OGLOV	ukb-b-12040	Non-cancer illness code, self-reported: deep venous thrombosis (dvt) || id:ukb-b-12040	1-palmitoyl-gpg (16:0)*	Inverse variance weighted	4	-0.0049958	0.000871975	1.00852e-08	-5.72929	Non-cancer illness code, self-reported: deep venous thrombosis (dvt)
2ccX6r	ukb-b-12849	Mouth/teeth dental problems: Loose teeth || id:ukb-b-12849	x-24241	Inverse variance weighted	7	-0.00296622	0.000517756	1.01024e-08	-5.729	Mouth/teeth dental problems: Loose teeth
VRlGic	ukb-a-248	Body mass index (BMI) || id:ukb-a-248	arachidonoylcarnitine (c20:4)	Inverse variance weighted	7	0.0415482	0.00725266	1.01216e-08	5.72868	Body mass index (BMI)
ypYPNn	ukb-b-15003	Diagnoses - main ICD10: L72.0 Epidermal cyst || id:ukb-b-15003	pc aa c32:2	Inverse variance weighted	6	-0.00269346	0.000470453	1.03285e-08	-5.72524	Diagnoses - main ICD10: L72.0 Epidermal cyst
0Q9zX1	ukb-a-25	Alcohol intake frequency. || id:ukb-a-25	5-hydroxy-2-methylpyridine sulfate	Inverse variance weighted	3	-0.110658	0.0193304	1.03695e-08	-5.72457	Alcohol intake frequency.
JDcypK	ukb-a-25	Alcohol intake frequency. || id:ukb-a-25	5-acetylamino-6-amino-3-methyluracil	Inverse variance weighted	3	-0.10915	0.0190669	1.03695e-08	-5.72457	Alcohol intake frequency.
Gla1pa	ieu-a-89	Height || id:ieu-a-89	pc aa c40:3	Inverse variance weighted	2	0.119972	0.0209587	1.03924e-08	5.7242	Height
EtaXQu	ukb-b-16048	Non-cancer illness code, self-reported: pulmonary embolism +/- dvt || id:ukb-b-16048	levulinoylcarnitine	Inverse variance weighted	5	-0.00416956	0.000728597	1.04827e-08	-5.72273	Non-cancer illness code, self-reported: pulmonary embolism +/- dvt
oJZ87S	ieu-a-1102	Chronic kidney disease || id:ieu-a-1102	n-acetyl-2-aminoadipate	Inverse variance weighted	3	-0.165064	0.0288788	1.0921e-08	-5.71577	Chronic kidney disease
3HuuGR	ieu-a-1102	Chronic kidney disease || id:ieu-a-1102	2-aminooctanoate	Inverse variance weighted	3	0.121968	0.0213388	1.0921e-08	5.71577	Chronic kidney disease
u0mbPU	ieu-a-1102	Chronic kidney disease || id:ieu-a-1102	methionine sulfone	Inverse variance weighted	3	0.152976	0.0267639	1.0921e-08	5.71577	Chronic kidney disease
y2VOfs	ieu-a-294	Inflammatory bowel disease || id:ieu-a-294	kynurenine	Wald ratio	1	0.52459	0.0918283	1.11181e-08	5.71273	Inflammatory bowel disease
ypYPNn	ieu-a-1188	Major Depressive Disorder || id:ieu-a-1188	pc aa c32:2	Inverse variance weighted	6	0.160953	0.0281993	1.14511e-08	5.7077	Major Depressive Disorder
TWxt25	ukb-b-18194	Non-cancer illness code, self-reported: ankylosing spondylitis || id:ukb-b-18194	1,2-dipalmitoyl-gpc (16:0/16:0)	Wald ratio	1	-0.00435395	0.000763208	1.16476e-08	-5.7048	Non-cancer illness code, self-reported: ankylosing spondylitis
EtaXQu	ukb-a-360	Systolic blood pressure automated reading || id:ukb-a-360	levulinoylcarnitine	Inverse variance weighted	6	0.0457593	0.00803159	1.21637e-08	5.69742	Systolic blood pressure automated reading
F5oBs5	ukb-b-1668	Diagnoses - main ICD10: I25.1 Atherosclerotic heart disease || id:ukb-b-1668	cis-3,4-methyleneheptanoate	Inverse variance weighted	2	-0.0120091	0.00210792	1.21859e-08	-5.69711	Diagnoses - main ICD10: I25.1 Atherosclerotic heart disease
nJ8HAX	ukb-b-17241	Blood clot, DVT, bronchitis, emphysema, asthma, rhinitis, eczema, allergy diagnosed by doctor: Hayfever, allergic rhinitis or eczema || id:ukb-b-17241	docosatrienoate (22:3n3)	Inverse variance weighted	3	-0.0131065	0.00230068	1.22074e-08	-5.6968	Blood clot, DVT, bronchitis, emphysema, asthma, rhinitis, eczema, allergy diagnosed by doctor: Hayfever, allergic rhinitis or eczema
n9Jq6X	ukb-b-13745	Irritability || id:ukb-b-13745	x-23780	Inverse variance weighted	3	0.0155015	0.0027254	1.28697e-08	5.68779	Irritability
DVBQgr	ukb-b-8837	Cancer code, self-reported: basal cell carcinoma || id:ukb-b-8837	1-palmitoyl-2-arachidonoyl-gpe (16:0/20:4)*	Inverse variance weighted	3	0.00488457	0.000858957	1.29572e-08	5.68663	Cancer code, self-reported: basal cell carcinoma
2180Ty	ukb-b-8837	Cancer code, self-reported: basal cell carcinoma || id:ukb-b-8837	pc aa c38:0	Inverse variance weighted	3	0.00646984	0.00113773	1.29572e-08	5.68663	Cancer code, self-reported: basal cell carcinoma
HdOdve	ukb-a-248	Body mass index (BMI) || id:ukb-a-248	dihomo-linolenoylcarnitine (c20:3n3 or 6)*	Inverse variance weighted	11	0.0298273	0.00524638	1.30577e-08	5.68531	Body mass index (BMI)
91mfpv	ukb-a-521	Diagnoses - main ICD10: D12 Benign neoplasm of colon rectum anus and anal canal || id:ukb-a-521	1-myristoyl-2-arachidonoyl-gpc (14:0/20:4)*	Inverse variance weighted	3	0.00883813	0.00155577	1.33995e-08	5.68089	Diagnoses - main ICD10: D12 Benign neoplasm of colon rectum anus and anal canal
5WEKgE	ieu-a-1188	Major Depressive Disorder || id:ieu-a-1188	pc ae c36:3	Inverse variance weighted	8	0.0818377	0.0144243	1.39837e-08	5.67359	Major Depressive Disorder
9wg2kh	ukb-b-12040	Non-cancer illness code, self-reported: deep venous thrombosis (dvt) || id:ukb-b-12040	1-arachidonoyl-gpe (20:4n6)*	Inverse variance weighted	3	-0.004753	0.000837805	1.40189e-08	-5.67316	Non-cancer illness code, self-reported: deep venous thrombosis (dvt)
91mfpv	ukb-b-14177	Vascular/heart problems diagnosed by doctor: High blood pressure || id:ukb-b-14177	1-myristoyl-2-arachidonoyl-gpc (14:0/20:4)*	Inverse variance weighted	3	-0.0280331	0.00494371	1.42414e-08	-5.67046	Vascular/heart problems diagnosed by doctor: High blood pressure
LWKVFP	ukb-b-1968	Diagnoses - main ICD10: K63.5 Polyp of colon || id:ukb-b-1968	pc ae c34:2	Inverse variance weighted	7	-0.00357702	0.000630924	1.43213e-08	-5.6695	Diagnoses - main ICD10: K63.5 Polyp of colon
IYuAX4	ieu-a-16	Childhood intelligence || id:ieu-a-16	2-stearoyl-gpe (18:0)*	Inverse variance weighted	8	-0.244812	0.0431935	1.44649e-08	-5.66779	Childhood intelligence
S1s8Er	ukb-b-4637	Diagnoses - main ICD10: H00.1 Chalazion || id:ukb-b-4637	linoleoyl-arachidonoyl-glycerol (18:2/20:4) [1]*	Inverse variance weighted	3	0.00147118	0.000259595	1.45134e-08	5.66722	Diagnoses - main ICD10: H00.1 Chalazion
1NAZBC	ukb-b-12040	Non-cancer illness code, self-reported: deep venous thrombosis (dvt) || id:ukb-b-12040	x-25433	Inverse variance weighted	3	-0.00370237	0.000653335	1.45421e-08	-5.66688	Non-cancer illness code, self-reported: deep venous thrombosis (dvt)
vmVo0s	ukb-b-12040	Non-cancer illness code, self-reported: deep venous thrombosis (dvt) || id:ukb-b-12040	eicosenedioate (c20:1-dc)*	Inverse variance weighted	3	-0.00371567	0.000655681	1.45421e-08	-5.66688	Non-cancer illness code, self-reported: deep venous thrombosis (dvt)
MOH26o	ieu-a-961	Cigarettes smoked per day || id:ieu-a-961	glutamine_degradant*	Inverse variance weighted	6	-1.35677	0.23947	1.46413e-08	-5.66571	Cigarettes smoked per day
5WEKgE	ukb-b-7444	Diagnoses - main ICD10: I84.8 Unspecified haemorrhoids with other complications || id:ukb-b-7444	pc ae c36:3	Inverse variance weighted	8	-0.00152075	0.000268435	1.46806e-08	-5.66526	Diagnoses - main ICD10: I84.8 Unspecified haemorrhoids with other complications
FYvImn	ukb-b-20213	Non-cancer illness code, self-reported: measles / morbillivirus || id:ukb-b-20213	serine	Inverse variance weighted	5	0.00415899	0.000734385	1.48546e-08	5.66323	Non-cancer illness code, self-reported: measles / morbillivirus
OmSfDW	ieu-a-1107	Urinary albumin-to-creatinine ratio || id:ieu-a-1107	cerotoylcarnitine (c26)*	Inverse variance weighted	4	0.119582	0.0211185	1.49254e-08	5.66242	Urinary albumin-to-creatinine ratio
k9OCte	ieu-a-1112	Primary sclerosing cholangitis || id:ieu-a-1112	taurodeoxycholic acid 3-sulfate	Inverse variance weighted	4	-0.296129	0.0523132	1.50754e-08	-5.6607	Primary sclerosing cholangitis
yfpVRE	ukb-b-11411	Blood clot, DVT, bronchitis, emphysema, asthma, rhinitis, eczema, allergy diagnosed by doctor: Blood clot in the leg (DVT) || id:ukb-b-11411	bradykinin, des-arg(9)	Inverse variance weighted	3	0.0148248	0.00261927	1.51469e-08	5.65989	Blood clot, DVT, bronchitis, emphysema, asthma, rhinitis, eczema, allergy diagnosed by doctor: Blood clot in the leg (DVT)
2ccX6r	ukb-a-360	Systolic blood pressure automated reading || id:ukb-a-360	x-24241	Inverse variance weighted	7	0.0174092	0.0030765	1.52459e-08	5.65877	Systolic blood pressure automated reading
kv1XRO	ieu-a-1004	Age at menopause || id:ieu-a-1004	1-dihomo-linoleoyl-gpc (20:2)	Inverse variance weighted	2	-0.186447	0.0329594	1.54173e-08	-5.65685	Age at menopause
bnD2Ym	ieu-a-1004	Age at menopause || id:ieu-a-1004	1-palmitoyl-2-alpha-linolenoyl-gpc (16:0/18:3n3)	Inverse variance weighted	2	-0.231317	0.0408914	1.54173e-08	-5.65685	Age at menopause
SHm7sR	ieu-a-275	Red blood cell count || id:ieu-a-275	1-stearoyl-gpe (18:0)	Inverse variance weighted	2	-0.0439747	0.00777371	1.54173e-08	-5.65685	Red blood cell count
BucRJO	ieu-a-23	Type 2 diabetes || id:ieu-a-23	sphingomyelin (d17:1/16:0, d18:1/15:0, d16:1/17:0)*	Inverse variance weighted	2	0.518928	0.0918144	1.58666e-08	5.65192	Type 2 diabetes
yN4trk	ieu-a-23	Type 2 diabetes || id:ieu-a-23	1-(1-enyl-palmitoyl)-2-oleoyl-gpc (p-16:0/18:1)*	Inverse variance weighted	2	0.51807	0.0916627	1.58666e-08	5.65192	Type 2 diabetes
bl5GIW	ieu-a-977	Forearm bone mineral density || id:ieu-a-977	1-palmitoyl-2-eicosapentaenoyl-gpc (16:0/20:5)	Inverse variance weighted	3	-0.221991	0.0392819	1.59315e-08	-5.65122	Forearm bone mineral density
IUlYa2	ieu-a-977	Forearm bone mineral density || id:ieu-a-977	1-eicosapentaenoyl-gpc (20:5)	Inverse variance weighted	3	-0.217214	0.0384366	1.59315e-08	-5.65122	Forearm bone mineral density
DaRI8K	ukb-b-4637	Diagnoses - main ICD10: H00.1 Chalazion || id:ukb-b-4637	hydroxypalmitoyl sphingomyelin (d18:1/16:0(oh))**	Inverse variance weighted	2	-0.00179586	0.000317829	1.60081e-08	-5.65039	Diagnoses - main ICD10: H00.1 Chalazion
dTGzGo	ukb-b-1968	Diagnoses - main ICD10: K63.5 Polyp of colon || id:ukb-b-1968	(n(1) + n(8))-acetylspermidine	Inverse variance weighted	5	-0.00233765	0.000413879	1.62188e-08	-5.64815	Diagnoses - main ICD10: K63.5 Polyp of colon
B9a5pb	ukb-a-25	Alcohol intake frequency. || id:ukb-a-25	x-12112	Inverse variance weighted	9	-0.00823532	0.0014582	1.62719e-08	-5.64758	Alcohol intake frequency.
64eMOw	ukb-b-5712	Diagnoses - main ICD10: N95.0 Postmenopausal bleeding || id:ukb-b-5712	sm (oh) c22:1	Inverse variance weighted	5	-0.00878821	0.00155654	1.64229e-08	-5.64599	Diagnoses - main ICD10: N95.0 Postmenopausal bleeding
XVHJCG	ieu-a-274	Packed cell volume || id:ieu-a-274	n6,n6-dimethyllysine	Inverse variance weighted	5	-0.040979	0.0072614	1.66715e-08	-5.64341	Packed cell volume
01Lweg	ieu-a-1097	Microalbuminuria || id:ieu-a-1097	myristoyl dihydrosphingomyelin (d18:0/14:0)*	Inverse variance weighted	5	-0.291273	0.0516129	1.66715e-08	-5.64341	Microalbuminuria
KNvR7s	ieu-a-1097	Microalbuminuria || id:ieu-a-1097	n-stearoyl-sphinganine (d18:0/18:0)*	Inverse variance weighted	5	-0.462587	0.0819694	1.66715e-08	-5.64341	Microalbuminuria
M0hsC1	ieu-a-1097	Microalbuminuria || id:ieu-a-1097	sphingomyelin (d18:1/25:0, d19:0/24:1, d20:1/23:0, d19:1/24:0)*	Inverse variance weighted	5	-0.138918	0.024616	1.66715e-08	-5.64341	Microalbuminuria
eQQIk3	ieu-a-294	Inflammatory bowel disease || id:ieu-a-294	pc ae c40:6	Inverse variance weighted	3	-0.434677	0.077036	1.67575e-08	-5.64252	Inflammatory bowel disease
LnY8gC	ieu-a-294	Inflammatory bowel disease || id:ieu-a-294	pc aa c38:6	Inverse variance weighted	3	-0.438043	0.0776324	1.67575e-08	-5.64252	Inflammatory bowel disease
hfQrfn	ukb-b-20078	Non-cancer illness code, self-reported: gastric/stomach ulcers || id:ukb-b-20078	pc ae c38:2	Inverse variance weighted	8	0.00244932	0.000434307	1.70441e-08	5.6396	Non-cancer illness code, self-reported: gastric/stomach ulcers
y1vKxF	ieu-a-12	Crohn's disease || id:ieu-a-12	x-12100	Wald ratio	1	0.626416	0.111085	1.71001e-08	5.63904	Crohn's disease
IUlYa2	ukb-b-9536	Diagnoses - main ICD10: D25.9 Leiomyoma of uterus, unspecified || id:ukb-b-9536	1-eicosapentaenoyl-gpc (20:5)	Inverse variance weighted	3	-0.00306986	0.000544777	1.74986e-08	-5.63507	Diagnoses - main ICD10: D25.9 Leiomyoma of uterus, unspecified
Bm6jSv	ukb-b-9536	Diagnoses - main ICD10: D25.9 Leiomyoma of uterus, unspecified || id:ukb-b-9536	1-dihomo-linolenoyl-gpe (20:3n3 or 6)	Inverse variance weighted	3	0.00242222	0.000429847	1.74986e-08	5.63507	Diagnoses - main ICD10: D25.9 Leiomyoma of uterus, unspecified
bl5GIW	ukb-b-9536	Diagnoses - main ICD10: D25.9 Leiomyoma of uterus, unspecified || id:ukb-b-9536	1-palmitoyl-2-eicosapentaenoyl-gpc (16:0/20:5)	Inverse variance weighted	3	-0.00313737	0.000556758	1.74986e-08	-5.63507	Diagnoses - main ICD10: D25.9 Leiomyoma of uterus, unspecified
l5hheq	ukb-b-7444	Diagnoses - main ICD10: I84.8 Unspecified haemorrhoids with other complications || id:ukb-b-7444	pc ae c36:2	Inverse variance weighted	8	-0.00241746	0.000429205	1.777e-08	-5.63242	Diagnoses - main ICD10: I84.8 Unspecified haemorrhoids with other complications
qp7xjv	ukb-a-360	Systolic blood pressure automated reading || id:ukb-a-360	x-12824	Inverse variance weighted	4	0.027971	0.00496873	1.80828e-08	5.62941	Systolic blood pressure automated reading
APGVyT	ukb-b-8707	Diagnoses - main ICD10: J22 Unspecified acute lower respiratory infection || id:ukb-b-8707	docosatrienoate (22:3n6)*	Inverse variance weighted	3	0.00299488	0.000532667	1.88289e-08	5.62243	Diagnoses - main ICD10: J22 Unspecified acute lower respiratory infection
6GuPUp	ukb-b-20544	Nervous feelings || id:ukb-b-20544	x-18913	Inverse variance weighted	5	0.0174466	0.00310435	1.90895e-08	5.62006	Nervous feelings
viIDke	ukb-b-20544	Nervous feelings || id:ukb-b-20544	2-hydroxysebacate	Inverse variance weighted	5	0.0136338	0.00242591	1.90895e-08	5.62006	Nervous feelings
APGVyT	ieu-a-1006	Mean platelet volume || id:ieu-a-1006	docosatrienoate (22:3n6)*	Inverse variance weighted	3	0.0183501	0.00326744	1.95379e-08	5.61604	Mean platelet volume
5WEKgE	ukb-b-15003	Diagnoses - main ICD10: L72.0 Epidermal cyst || id:ukb-b-15003	pc ae c36:3	Inverse variance weighted	8	-0.00135056	0.000240596	1.98428e-08	-5.61337	Diagnoses - main ICD10: L72.0 Epidermal cyst
ypYPNn	ieu-a-1128	ER- Breast cancer (Combined Oncoarray; iCOGS; GWAS meta analysis) || id:ieu-a-1128	pc aa c32:2	Inverse variance weighted	6	-0.228852	0.0407842	2.0081e-08	-5.6113	ER- Breast cancer (Combined Oncoarray; iCOGS; GWAS meta analysis)
G21Fp2	ieu-a-7	Coronary heart disease || id:ieu-a-7	1-(1-enyl-palmitoyl)-2-linoleoyl-gpc (p-16:0/18:2)*	Inverse variance weighted	3	-0.290385	0.0517577	2.01783e-08	-5.61047	Coronary heart disease
l5hheq	ukb-b-8720	Non-cancer illness code, self-reported: pernicious anaemia || id:ukb-b-8720	pc ae c36:2	Inverse variance weighted	8	-0.00187242	0.000333784	2.02711e-08	-5.60967	Non-cancer illness code, self-reported: pernicious anaemia
F5oBs5	ukb-b-8184	Diagnoses - secondary ICD10: I25.9 Chronic ischaemic heart disease, unspecified || id:ukb-b-8184	cis-3,4-methyleneheptanoate	Inverse variance weighted	2	-0.008302	0.00148041	2.04797e-08	-5.6079	Diagnoses - secondary ICD10: I25.9 Chronic ischaemic heart disease, unspecified
EnI8Rf	ukb-b-14486	Non-cancer illness code, self-reported: osteoarthritis || id:ukb-b-14486	x-11381	Inverse variance weighted	3	0.0133021	0.0023729	2.07217e-08	5.60587	Non-cancer illness code, self-reported: osteoarthritis
j2spA0	ukb-b-9981	Sensitivity / hurt feelings || id:ukb-b-9981	5alpha-androstan-3beta,17beta-diol monosulfate (2)	Inverse variance weighted	2	-0.0353852	0.00631258	2.07648e-08	-5.60551	Sensitivity / hurt feelings
dVokOy	ieu-a-1045	Hippocampus volume || id:ieu-a-1045	n-acetylcitrulline	Inverse variance weighted	5	-14.1023	2.5159	2.07922e-08	-5.60528	Hippocampus volume
hd47cc	ieu-a-1045	Hippocampus volume || id:ieu-a-1045	n-acetylornithine	Inverse variance weighted	5	16.8691	3.0095	2.07922e-08	5.60528	Hippocampus volume
bl5GIW	ukb-b-8707	Diagnoses - main ICD10: J22 Unspecified acute lower respiratory infection || id:ukb-b-8707	1-palmitoyl-2-eicosapentaenoyl-gpc (16:0/20:5)	Inverse variance weighted	3	0.00239627	0.000427639	2.10078e-08	5.60349	Diagnoses - main ICD10: J22 Unspecified acute lower respiratory infection
Bm6jSv	ukb-b-8707	Diagnoses - main ICD10: J22 Unspecified acute lower respiratory infection || id:ukb-b-8707	1-dihomo-linolenoyl-gpe (20:3n3 or 6)	Inverse variance weighted	3	-0.00185005	0.00033016	2.10078e-08	-5.60349	Diagnoses - main ICD10: J22 Unspecified acute lower respiratory infection
IUlYa2	ukb-b-8707	Diagnoses - main ICD10: J22 Unspecified acute lower respiratory infection || id:ukb-b-8707	1-eicosapentaenoyl-gpc (20:5)	Inverse variance weighted	3	0.0023447	0.000418436	2.10078e-08	5.60349	Diagnoses - main ICD10: J22 Unspecified acute lower respiratory infection
r5IHKk	ukb-b-4637	Diagnoses - main ICD10: H00.1 Chalazion || id:ukb-b-4637	pc aa c40:2	Inverse variance weighted	2	0.0180758	0.00322636	2.11241e-08	5.60253	Diagnoses - main ICD10: H00.1 Chalazion
bnD2Ym	ukb-b-4637	Diagnoses - main ICD10: H00.1 Chalazion || id:ukb-b-4637	1-palmitoyl-2-alpha-linolenoyl-gpc (16:0/18:3n3)	Inverse variance weighted	2	-0.00142162	0.000253746	2.11241e-08	-5.60253	Diagnoses - main ICD10: H00.1 Chalazion
AaoeUO	ukb-b-19732	Non-cancer illness code, self-reported: hypothyroidism/myxoedema || id:ukb-b-19732	lysopc a c28:0	Wald ratio	1	-0.0265904	0.00474856	2.14745e-08	-5.59968	Non-cancer illness code, self-reported: hypothyroidism/myxoedema
1NAZBC	ukb-b-13731	Diagnoses - main ICD10: K22.1 Ulcer of oesophagus || id:ukb-b-13731	x-25433	Inverse variance weighted	3	-0.00218261	0.000389778	2.14826e-08	-5.59962	Diagnoses - main ICD10: K22.1 Ulcer of oesophagus
vmVo0s	ukb-b-13731	Diagnoses - main ICD10: K22.1 Ulcer of oesophagus || id:ukb-b-13731	eicosenedioate (c20:1-dc)*	Inverse variance weighted	3	-0.00219045	0.000391178	2.14826e-08	-5.59962	Diagnoses - main ICD10: K22.1 Ulcer of oesophagus
KjIrRE	ukb-b-13731	Diagnoses - main ICD10: K22.1 Ulcer of oesophagus || id:ukb-b-13731	x-21467	Inverse variance weighted	3	-0.00178109	0.000318074	2.14826e-08	-5.59962	Diagnoses - main ICD10: K22.1 Ulcer of oesophagus
MInmoG	ukb-b-9536	Diagnoses - main ICD10: D25.9 Leiomyoma of uterus, unspecified || id:ukb-b-9536	1-(1-enyl-palmitoyl)-2-arachidonoyl-gpe (p-16:0/20:4)*	Inverse variance weighted	5	-0.00236101	0.000421755	2.16744e-08	-5.59808	Diagnoses - main ICD10: D25.9 Leiomyoma of uterus, unspecified
5WEKgE	ukb-b-20078	Non-cancer illness code, self-reported: gastric/stomach ulcers || id:ukb-b-20078	pc ae c36:3	Inverse variance weighted	8	0.00179702	0.000321072	2.18155e-08	5.59695	Non-cancer illness code, self-reported: gastric/stomach ulcers
nbhiB0	ieu-a-1045	Hippocampus volume || id:ieu-a-1045	n-acetyl-1-methylhistidine*	Inverse variance weighted	8	-15.0917	2.69654	2.18473e-08	-5.5967	Hippocampus volume
YaFAh6	ieu-a-1186	Anorexia Nervosa || id:ieu-a-1186	pc aa c36:4	Inverse variance weighted	7	-0.671863	0.120058	2.19174e-08	-5.59614	Anorexia Nervosa
Nczq90	ukb-a-359	Diastolic blood pressure automated reading || id:ukb-a-359	x-24071	Inverse variance weighted	3	0.0265607	0.00474691	2.2015e-08	5.59537	Diastolic blood pressure automated reading
64eMOw	ieu-a-1009	Subjective well being || id:ieu-a-1009	sm (oh) c22:1	Inverse variance weighted	5	0.129983	0.023252	2.26847e-08	5.59017	Subjective well being
Z2SbbQ	ieu-a-1009	Subjective well being || id:ieu-a-1009	sm (oh) c22:2	Inverse variance weighted	5	0.140713	0.0251715	2.26847e-08	5.59017	Subjective well being
iMELqp	ieu-a-89	Height || id:ieu-a-89	galactonate	Wald ratio	1	0.155972	0.0279107	2.29389e-08	5.58824	Height
B9a5pb	ieu-a-274	Packed cell volume || id:ieu-a-274	x-12112	Inverse variance weighted	7	-0.0412908	0.00739419	2.34753e-08	-5.58422	Packed cell volume
iCT5wr	ieu-a-1008	Platelet count || id:ieu-a-1008	1-palmitoyl-2-meadoyl-gpc (16:0/20:3n9)	Wald ratio	1	-6.85859	1.22836	2.35658e-08	-5.58355	Platelet count
5WEKgE	ieu-a-1048	Thalamus volume || id:ieu-a-1048	pc ae c36:3	Inverse variance weighted	8	-63.1674	11.3272	2.4528e-08	-5.57659	Thalamus volume
BucRJO	ukb-a-335	Sodium in urine || id:ukb-a-335	sphingomyelin (d17:1/16:0, d18:1/15:0, d16:1/17:0)*	Inverse variance weighted	2	-0.0997644	0.0179013	2.50368e-08	-5.57302	Sodium in urine
yN4trk	ukb-a-335	Sodium in urine || id:ukb-a-335	1-(1-enyl-palmitoyl)-2-oleoyl-gpc (p-16:0/18:1)*	Inverse variance weighted	2	-0.0995996	0.0178718	2.50368e-08	-5.57302	Sodium in urine
l34vPv	ukb-a-500	Heel bone mineral density (BMD) T-score automated || id:ukb-a-500	sphingomyelin (d18:1/20:2, d18:2/20:1, d16:1/22:2)*	Inverse variance weighted	2	0.0859743	0.0154309	2.52477e-08	5.57155	Heel bone mineral density (BMD) T-score automated
F7Qzlp	ukb-b-7872	Mouth/teeth dental problems: Bleeding gums || id:ukb-b-7872	pc ae c38:4	Inverse variance weighted	3	-0.0244522	0.00438882	2.52608e-08	-5.57146	Mouth/teeth dental problems: Bleeding gums
7AtiBd	ukb-b-2964	Diagnoses - secondary ICD10: F17.1 Harmful use || id:ukb-b-2964	pc ae c42:2	Inverse variance weighted	8	0.00237267	0.000425876	2.52902e-08	5.57126	Diagnoses - secondary ICD10: F17.1 Harmful use
mdCCE4	ieu-a-89	Height || id:ieu-a-89	1-palmitoyl-2-dihomo-linolenoyl-gpc (16:0/20:3n3 or 6)*	Inverse variance weighted	2	0.0774063	0.0138941	2.53072e-08	5.57114	Height
XjZgRS	ieu-a-1127	ER+ Breast cancer (Combined Oncoarray; iCOGS; GWAS meta analysis) || id:ieu-a-1127	carboxyethyl-gaba	Inverse variance weighted	4	-0.150588	0.0270374	2.55295e-08	-5.56962	ER+ Breast cancer (Combined Oncoarray; iCOGS; GWAS meta analysis)
dVokOy	ukb-b-20464	Doctor diagnosed COPD (chronic obstructive pulmonary disease) || id:ukb-b-20464	n-acetylcitrulline	Inverse variance weighted	5	-0.0015067	0.000270574	2.56893e-08	-5.56853	Doctor diagnosed COPD (chronic obstructive pulmonary disease)
KxAfEP	ieu-a-275	Red blood cell count || id:ieu-a-275	1-stearoyl-2-oleoyl-gpe (18:0/18:1)	Inverse variance weighted	5	-0.0330695	0.00594516	2.66058e-08	-5.56242	Red blood cell count
IUlYa2	ukb-a-359	Diastolic blood pressure automated reading || id:ukb-a-359	1-eicosapentaenoyl-gpc (20:5)	Inverse variance weighted	3	-0.0335619	0.00603581	2.69064e-08	-5.56046	Diastolic blood pressure automated reading
7yNvk5	ukb-a-500	Heel bone mineral density (BMD) T-score automated || id:ukb-a-500	phenylalanylserine	Inverse variance weighted	2	0.0535488	0.00963481	2.73123e-08	5.55785	Heel bone mineral density (BMD) T-score automated
43IJl3	ukb-b-8720	Non-cancer illness code, self-reported: pernicious anaemia || id:ukb-b-8720	stearidonate (18:4n3)	Inverse variance weighted	4	0.0027445	0.000493872	2.7428e-08	5.55711	Non-cancer illness code, self-reported: pernicious anaemia
Jjonf2	ukb-b-8720	Non-cancer illness code, self-reported: pernicious anaemia || id:ukb-b-8720	pc aa c42:4	Inverse variance weighted	4	0.00697627	0.00125538	2.7428e-08	5.55711	Non-cancer illness code, self-reported: pernicious anaemia
5WEKgE	ukb-b-1968	Diagnoses - main ICD10: K63.5 Polyp of colon || id:ukb-b-1968	pc ae c36:3	Inverse variance weighted	8	-0.00213394	0.000384065	2.75707e-08	-5.5562	Diagnoses - main ICD10: K63.5 Polyp of colon
hfQrfn	ukb-b-7444	Diagnoses - main ICD10: I84.8 Unspecified haemorrhoids with other complications || id:ukb-b-7444	pc ae c38:2	Inverse variance weighted	8	-0.00201731	0.000363107	2.76539e-08	-5.55568	Diagnoses - main ICD10: I84.8 Unspecified haemorrhoids with other complications
AJj8LE	ieu-a-982	Lumbar spine bone mineral density || id:ieu-a-982	3-amino-2-piperidone	Inverse variance weighted	4	0.23683	0.0426597	2.83047e-08	5.55161	Lumbar spine bone mineral density
MInmoG	ieu-a-833	Rheumatoid arthritis || id:ieu-a-833	1-(1-enyl-palmitoyl)-2-arachidonoyl-gpe (p-16:0/20:4)*	Inverse variance weighted	5	0.162497	0.0292707	2.83204e-08	5.55152	Rheumatoid arthritis
sAOf0q	ukb-a-249	Weight || id:ukb-a-249	androstenediol (3beta,17beta) disulfate (2)	Inverse variance weighted	2	-0.0876077	0.015782	2.83877e-08	-5.5511	Weight
53K1qO	ieu-a-1112	Primary sclerosing cholangitis || id:ieu-a-1112	n-oleoyltaurine	Inverse variance weighted	3	-0.891761	0.160737	2.89014e-08	-5.54796	Primary sclerosing cholangitis
MInmoG	ieu-a-1006	Mean platelet volume || id:ieu-a-1006	1-(1-enyl-palmitoyl)-2-arachidonoyl-gpe (p-16:0/20:4)*	Inverse variance weighted	5	0.0114114	0.00205739	2.91328e-08	5.54657	Mean platelet volume
EnI8Rf	ieu-a-1006	Mean platelet volume || id:ieu-a-1006	x-11381	Inverse variance weighted	3	-0.0229699	0.00414427	2.98077e-08	-5.54256	Mean platelet volume
ev60og	ukb-b-4637	Diagnoses - main ICD10: H00.1 Chalazion || id:ukb-b-4637	1-palmitoleoyl-2-linoleoyl-gpc (16:1/18:2)	Inverse variance weighted	2	-0.00158987	0.000287021	3.03845e-08	-5.53921	Diagnoses - main ICD10: H00.1 Chalazion
S1s8Er	ukb-a-359	Diastolic blood pressure automated reading || id:ukb-a-359	linoleoyl-arachidonoyl-glycerol (18:2/20:4) [1]*	Inverse variance weighted	6	-0.0335946	0.00606579	3.05292e-08	-5.53837	Diastolic blood pressure automated reading
Bm6jSv	ieu-a-965	Lung adenocarcinoma || id:ieu-a-965	1-dihomo-linolenoyl-gpe (20:3n3 or 6)	Inverse variance weighted	3	-0.271208	0.0489988	3.11236e-08	-5.535	Lung adenocarcinoma
nJ8HAX	ukb-b-13251	Non-cancer illness code, self-reported: gout || id:ukb-b-13251	docosatrienoate (22:3n3)	Inverse variance weighted	3	0.00357205	0.000645456	3.12744e-08	5.53415	Non-cancer illness code, self-reported: gout
yKwhnv	ieu-a-270	Haemoglobin concentration || id:ieu-a-270	sphingomyelin (d18:1/21:0, d17:1/22:0, d16:1/23:0)*	Inverse variance weighted	5	0.0931574	0.0168357	3.14224e-08	5.53332	Haemoglobin concentration
872gnc	ieu-a-12	Crohn's disease || id:ieu-a-12	lysopc a c26:0	Wald ratio	1	0.531473	0.0960524	3.14512e-08	5.53316	Crohn's disease
W1mNxI	ieu-a-966	Lung cancer || id:ieu-a-966	pc aa c34:2	Inverse variance weighted	5	-0.356138	0.0643744	3.16067e-08	-5.5323	Lung cancer
5WEKgE	ieu-a-23	Type 2 diabetes || id:ieu-a-23	pc ae c36:3	Inverse variance weighted	8	-0.120389	0.0217687	3.19535e-08	-5.53038	Type 2 diabetes
KjIrRE	ieu-a-89	Height || id:ieu-a-89	x-21467	Inverse variance weighted	4	-0.0265804	0.00480749	3.22152e-08	-5.52895	Height
S1s8Er	ieu-a-965	Lung adenocarcinoma || id:ieu-a-965	linoleoyl-arachidonoyl-glycerol (18:2/20:4) [1]*	Inverse variance weighted	6	0.285911	0.0517209	3.23982e-08	5.52796	Lung adenocarcinoma
ypYPNn	ieu-a-967	Squamous cell lung cancer || id:ieu-a-967	pc aa c32:2	Inverse variance weighted	6	-0.50913	0.0921313	3.27368e-08	-5.52613	Squamous cell lung cancer
kiSFZT	ukb-a-249	Weight || id:ukb-a-249	gamma-glutamylglutamine	Inverse variance weighted	3	0.0453925	0.00821472	3.28091e-08	5.52574	Weight
6l7DTh	ukb-b-14180	Mood swings || id:ukb-b-14180	sm c16:0	Inverse variance weighted	20	-0.0136912	0.00248132	3.43452e-08	-5.51771	Mood swings
bl5GIW	ieu-a-833	Rheumatoid arthritis || id:ieu-a-833	1-palmitoyl-2-eicosapentaenoyl-gpc (16:0/20:5)	Inverse variance weighted	3	0.205955	0.0373627	3.54136e-08	5.51232	Rheumatoid arthritis
Bm6jSv	ieu-a-833	Rheumatoid arthritis || id:ieu-a-833	1-dihomo-linolenoyl-gpe (20:3n3 or 6)	Inverse variance weighted	3	-0.159009	0.028846	3.54136e-08	-5.51232	Rheumatoid arthritis
IUlYa2	ieu-a-833	Rheumatoid arthritis || id:ieu-a-833	1-eicosapentaenoyl-gpc (20:5)	Inverse variance weighted	3	0.201523	0.0365587	3.54136e-08	5.51232	Rheumatoid arthritis
ypYPNn	ieu-a-977	Forearm bone mineral density || id:ieu-a-977	pc aa c32:2	Inverse variance weighted	6	0.328251	0.059576	3.59275e-08	5.50978	Forearm bone mineral density
DVBQgr	ieu-a-7	Coronary heart disease || id:ieu-a-7	1-palmitoyl-2-arachidonoyl-gpe (16:0/20:4)*	Inverse variance weighted	5	0.182117	0.0330578	3.60785e-08	5.50905	Coronary heart disease
W1mNxI	ukb-b-4637	Diagnoses - main ICD10: H00.1 Chalazion || id:ukb-b-4637	pc aa c34:2	Inverse variance weighted	5	-0.00245556	0.000445909	3.65298e-08	-5.50686	Diagnoses - main ICD10: H00.1 Chalazion
TWxt25	ukb-b-14177	Vascular/heart problems diagnosed by doctor: High blood pressure || id:ukb-b-14177	1,2-dipalmitoyl-gpc (16:0/16:0)	Wald ratio	1	0.0348006	0.00631972	3.65684e-08	5.50667	Vascular/heart problems diagnosed by doctor: High blood pressure
l5hheq	ieu-a-1000	Depressive symptoms || id:ieu-a-1000	pc ae c36:2	Inverse variance weighted	8	0.0583672	0.0106032	3.69822e-08	5.50469	Depressive symptoms
ypYPNn	ieu-a-1046	Pallidum volume || id:ieu-a-1046	pc aa c32:2	Inverse variance weighted	6	-37.2235	6.7653	3.75269e-08	-5.50211	Pallidum volume
KxAfEP	ieu-a-270	Haemoglobin concentration || id:ieu-a-270	1-stearoyl-2-oleoyl-gpe (18:0/18:1)	Inverse variance weighted	5	-0.108925	0.0198175	3.87621e-08	-5.4964	Haemoglobin concentration
2180Ty	ukb-b-8707	Diagnoses - main ICD10: J22 Unspecified acute lower respiratory infection || id:ukb-b-8707	pc aa c38:0	Inverse variance weighted	3	0.00535076	0.000973609	3.8893e-08	5.49581	Diagnoses - main ICD10: J22 Unspecified acute lower respiratory infection
DVBQgr	ukb-b-8707	Diagnoses - main ICD10: J22 Unspecified acute lower respiratory infection || id:ukb-b-8707	1-palmitoyl-2-arachidonoyl-gpe (16:0/20:4)*	Inverse variance weighted	3	0.00403969	0.00073505	3.8893e-08	5.49581	Diagnoses - main ICD10: J22 Unspecified acute lower respiratory infection
SJzXjb	ieu-a-89	Height || id:ieu-a-89	6-bromotryptophan	Inverse variance weighted	3	0.0675272	0.0122959	3.97704e-08	5.49187	Height
BS3ZnW	ieu-a-89	Height || id:ieu-a-89	n-acetyltyrosine	Inverse variance weighted	3	-0.0433377	0.00789124	3.97704e-08	-5.49187	Height
AJO4EV	ukb-b-18349	Non-cancer illness code, self-reported: benign breast lump || id:ukb-b-18349	pc aa c38:5	Inverse variance weighted	6	-0.00275618	0.000501946	3.99669e-08	-5.491	Non-cancer illness code, self-reported: benign breast lump
DVBQgr	ukb-a-359	Diastolic blood pressure automated reading || id:ukb-a-359	1-palmitoyl-2-arachidonoyl-gpe (16:0/20:4)*	Inverse variance weighted	5	-0.0571028	0.010402	4.02864e-08	-5.48959	Diastolic blood pressure automated reading
4ff6rP	ukb-a-360	Systolic blood pressure automated reading || id:ukb-a-360	cis-4-decenoylcarnitine (c10:1)	Inverse variance weighted	4	0.0186386	0.00339596	4.0547e-08	5.48845	Systolic blood pressure automated reading
MD20aD	ukb-a-360	Systolic blood pressure automated reading || id:ukb-a-360	cis-4-decenoate (10:1n6)*	Inverse variance weighted	4	0.0222898	0.00406123	4.0547e-08	5.48845	Systolic blood pressure automated reading
BqPVj4	ieu-a-1052	Transferrin || id:ieu-a-1052	sphingomyelin (d18:2/14:0, d18:1/14:1)*	Wald ratio	1	-0.621152	0.113215	4.10007e-08	-5.48649	Transferrin
G5tcXK	ieu-a-1052	Transferrin || id:ieu-a-1052	1-stearoyl-2-linoleoyl-gpe (18:0/18:2)*	Wald ratio	1	0.214741	0.03914	4.10007e-08	5.48649	Transferrin
mDd4SI	ukb-b-6519	Worrier / anxious feelings || id:ukb-b-6519	argininate*	Inverse variance weighted	3	0.0273878	0.00499422	4.16055e-08	5.4839	Worrier / anxious feelings
l34vPv	ieu-a-1008	Platelet count || id:ieu-a-1008	sphingomyelin (d18:1/20:2, d18:2/20:1, d16:1/22:2)*	Wald ratio	1	12.2628	2.23715	4.21885e-08	5.48144	Platelet count
wkLuzs	ukb-b-7872	Mouth/teeth dental problems: Bleeding gums || id:ukb-b-7872	behenoyl dihydrosphingomyelin (d18:0/22:0)*	Inverse variance weighted	5	0.0148779	0.00271532	4.27159e-08	5.47924	Mouth/teeth dental problems: Bleeding gums
7byy5c	ukb-b-12849	Mouth/teeth dental problems: Loose teeth || id:ukb-b-12849	isobutyrylcarnitine (c4)	Inverse variance weighted	7	-0.00779422	0.00142339	4.35468e-08	-5.47583	Mouth/teeth dental problems: Loose teeth
G3p6NL	ieu-a-89	Height || id:ieu-a-89	x-24278	Inverse variance weighted	2	0.0342581	0.0062579	4.39058e-08	5.47438	Height
kv1XRO	ieu-a-89	Height || id:ieu-a-89	1-dihomo-linoleoyl-gpc (20:2)	Inverse variance weighted	2	-0.027967	0.00510871	4.39058e-08	-5.47438	Height
5WEKgE	ieu-a-1128	ER- Breast cancer (Combined Oncoarray; iCOGS; GWAS meta analysis) || id:ieu-a-1128	pc ae c36:3	Inverse variance weighted	8	-0.113966	0.0208229	4.42169e-08	-5.47312	ER- Breast cancer (Combined Oncoarray; iCOGS; GWAS meta analysis)
hfQrfn	ukb-b-16426	Non-cancer illness code, self-reported: breast cysts || id:ukb-b-16426	pc ae c38:2	Inverse variance weighted	8	-0.00174252	0.000318409	4.43493e-08	-5.47259	Non-cancer illness code, self-reported: breast cysts
F7Qzlp	ieu-a-294	Inflammatory bowel disease || id:ieu-a-294	pc ae c38:4	Inverse variance weighted	3	-0.344127	0.0628902	4.45313e-08	-5.47187	Inflammatory bowel disease
cUjbYG	ieu-a-1126	Breast cancer (Combined Oncoarray; iCOGS; GWAS meta analysis) || id:ieu-a-1126	octadecenoylcarnitine	Inverse variance weighted	2	-0.228395	0.0417779	4.58012e-08	-5.46689	Breast cancer (Combined Oncoarray; iCOGS; GWAS meta analysis)
ROJpfl	ukb-b-13745	Irritability || id:ukb-b-13745	3-aminoisobutyrate	Inverse variance weighted	3	-0.0140723	0.00257453	4.6042e-08	-5.46596	Irritability
p30GoV	ukb-b-16781	Diagnoses - main ICD10: G47.3 Sleep apnoea || id:ukb-b-16781	n2-acetyl,n6-methyllysine	Inverse variance weighted	10	-0.000300832	5.50507e-05	4.63868e-08	-5.46463	Diagnoses - main ICD10: G47.3 Sleep apnoea
tkhRFB	ukb-a-9	Sleep duration || id:ukb-a-9	x-25419	Inverse variance weighted	3	0.0432986	0.00792482	4.6639e-08	5.46367	Sleep duration
hVMTce	ukb-b-14177	Vascular/heart problems diagnosed by doctor: High blood pressure || id:ukb-b-14177	pc aa c36:5	Inverse variance weighted	4	-0.0385844	0.00706305	4.68528e-08	-5.46286	Vascular/heart problems diagnosed by doctor: High blood pressure
ZSUiqr	ieu-a-89	Height || id:ieu-a-89	hypotaurine	Inverse variance weighted	2	-0.113326	0.0207493	4.71615e-08	-5.46169	Height
EtaXQu	ukb-a-337	Forced expiratory volume in 1-second (FEV1) || id:ukb-a-337	levulinoylcarnitine	Inverse variance weighted	6	-0.0396161	0.00725363	4.71993e-08	-5.46155	Forced expiratory volume in 1-second (FEV1)
bl5GIW	ukb-b-8720	Non-cancer illness code, self-reported: pernicious anaemia || id:ukb-b-8720	1-palmitoyl-2-eicosapentaenoyl-gpc (16:0/20:5)	Inverse variance weighted	3	0.00156443	0.000286444	4.72004e-08	5.46155	Non-cancer illness code, self-reported: pernicious anaemia
Bm6jSv	ukb-b-8720	Non-cancer illness code, self-reported: pernicious anaemia || id:ukb-b-8720	1-dihomo-linolenoyl-gpe (20:3n3 or 6)	Inverse variance weighted	3	-0.00120782	0.00022115	4.72004e-08	-5.46155	Non-cancer illness code, self-reported: pernicious anaemia
IUlYa2	ukb-b-8720	Non-cancer illness code, self-reported: pernicious anaemia || id:ukb-b-8720	1-eicosapentaenoyl-gpc (20:5)	Inverse variance weighted	3	0.00153076	0.00028028	4.72004e-08	5.46155	Non-cancer illness code, self-reported: pernicious anaemia
071Guo	ukb-b-6519	Worrier / anxious feelings || id:ukb-b-6519	tyrosine	Inverse variance weighted	10	0.0310392	0.00568435	4.74881e-08	5.46047	Worrier / anxious feelings
KfGV2h	ukb-b-17400	Snoring || id:ukb-b-17400	x-16397	Wald ratio	1	-0.046506	0.0085243	4.87829e-08	-5.45569	Snoring
l5hheq	ieu-a-1188	Major Depressive Disorder || id:ieu-a-1188	pc ae c36:2	Inverse variance weighted	8	0.126036	0.0231023	4.88168e-08	5.45557	Major Depressive Disorder
yK15mu	ieu-a-271	Mean cell haemoglobin || id:ieu-a-271	sm c18:1	Inverse variance weighted	6	0.277303	0.0508381	4.90767e-08	5.45462	Mean cell haemoglobin
7byy5c	ukb-b-13704	Blood clot, DVT, bronchitis, emphysema, asthma, rhinitis, eczema, allergy diagnosed by doctor: Blood clot in the lung || id:ukb-b-13704	isobutyrylcarnitine (c4)	Inverse variance weighted	7	-0.00353668	0.000648707	4.98373e-08	-5.45189	Blood clot, DVT, bronchitis, emphysema, asthma, rhinitis, eczema, allergy diagnosed by doctor: Blood clot in the lung
rzcVcK	ukb-a-9	Sleep duration || id:ukb-a-9	1-(1-enyl-stearoyl)-2-linoleoyl-gpe (p-18:0/18:2)*	Inverse variance weighted	7	0.0294342	0.00540138	5.05444e-08	5.44938	Sleep duration
biD8xJ	ukb-b-20078	Non-cancer illness code, self-reported: gastric/stomach ulcers || id:ukb-b-20078	pc aa c36:3	Inverse variance weighted	11	0.0020175	0.000370517	5.17822e-08	5.44508	Non-cancer illness code, self-reported: gastric/stomach ulcers
P4E4Tu	ieu-a-1106	Serum cystatin C (eGFRcys) || id:ieu-a-1106	pseudouridine	Wald ratio	1	-0.106846	0.0196247	5.19673e-08	-5.44444	Serum cystatin C (eGFRcys)
l5hheq	ukb-b-16426	Non-cancer illness code, self-reported: breast cysts || id:ukb-b-16426	pc ae c36:2	Inverse variance weighted	8	-0.00204865	0.000376372	5.23474e-08	-5.44315	Non-cancer illness code, self-reported: breast cysts
mDd4SI	ukb-b-11411	Blood clot, DVT, bronchitis, emphysema, asthma, rhinitis, eczema, allergy diagnosed by doctor: Blood clot in the leg (DVT) || id:ukb-b-11411	argininate*	Inverse variance weighted	3	0.00730195	0.00134379	5.51573e-08	5.43383	Blood clot, DVT, bronchitis, emphysema, asthma, rhinitis, eczema, allergy diagnosed by doctor: Blood clot in the leg (DVT)
yfpVRE	ukb-b-12040	Non-cancer illness code, self-reported: deep venous thrombosis (dvt) || id:ukb-b-12040	bradykinin, des-arg(9)	Inverse variance weighted	3	0.0148412	0.0027329	5.61769e-08	5.43056	Non-cancer illness code, self-reported: deep venous thrombosis (dvt)
A7FT3J	ukb-a-359	Diastolic blood pressure automated reading || id:ukb-a-359	isoleucylvaline	Inverse variance weighted	3	0.0286311	0.0052813	5.91946e-08	5.42122	Diastolic blood pressure automated reading
0Q9zX1	ukb-a-249	Weight || id:ukb-a-249	5-hydroxy-2-methylpyridine sulfate	Inverse variance weighted	3	0.0625891	0.0115463	5.93628e-08	5.42071	Weight
JDcypK	ukb-a-249	Weight || id:ukb-a-249	5-acetylamino-6-amino-3-methyluracil	Inverse variance weighted	3	0.0617358	0.0113889	5.93628e-08	5.42071	Weight
boBryA	ukb-b-12930	Mouth/teeth dental problems: Dentures || id:ukb-b-12930	tiglylcarnitine (c5:1-dc)	Inverse variance weighted	3	-0.0197329	0.00364163	6.00347e-08	-5.4187	Mouth/teeth dental problems: Dentures
SHm7sR	ieu-a-274	Packed cell volume || id:ieu-a-274	1-stearoyl-gpe (18:0)	Inverse variance weighted	2	-0.342238	0.0632036	6.13402e-08	-5.41485	Packed cell volume
ROJpfl	ukb-a-9	Sleep duration || id:ukb-a-9	3-aminoisobutyrate	Inverse variance weighted	3	0.0274861	0.00507659	6.15369e-08	5.41428	Sleep duration
dVokOy	ieu-a-1102	Chronic kidney disease || id:ieu-a-1102	n-acetylcitrulline	Inverse variance weighted	5	-0.0454716	0.00839946	6.17569e-08	-5.41364	Chronic kidney disease
hd47cc	ieu-a-1102	Chronic kidney disease || id:ieu-a-1102	n-acetylornithine	Inverse variance weighted	5	0.0543928	0.0100474	6.17569e-08	5.41364	Chronic kidney disease
4vortU	ukb-a-359	Diastolic blood pressure automated reading || id:ukb-a-359	prolylglycine	Inverse variance weighted	2	0.0917715	0.0169584	6.24729e-08	5.41157	Diastolic blood pressure automated reading
QyXifh	ukb-a-500	Heel bone mineral density (BMD) T-score automated || id:ukb-a-500	1-stearoyl-2-linoleoyl-gpc (18:0/18:2)*	Inverse variance weighted	3	-0.103444	0.0191203	6.29615e-08	-5.41018	Heel bone mineral density (BMD) T-score automated
ZTszCZ	ukb-a-500	Heel bone mineral density (BMD) T-score automated || id:ukb-a-500	1-palmitoyl-2-linoleoyl-gpc (16:0/18:2)	Inverse variance weighted	3	-0.0982109	0.018153	6.29615e-08	-5.41018	Heel bone mineral density (BMD) T-score automated
iRMbTB	ukb-a-500	Heel bone mineral density (BMD) T-score automated || id:ukb-a-500	1-stearoyl-2-linoleoyl-gpi (18:0/18:2)	Inverse variance weighted	3	-0.0652517	0.0120609	6.29615e-08	-5.41018	Heel bone mineral density (BMD) T-score automated
ypYPNn	ieu-a-1110	Large vessel disease || id:ieu-a-1110	pc aa c32:2	Inverse variance weighted	6	-0.681119	0.125936	6.3573e-08	-5.40845	Large vessel disease
lvJZsE	ukb-b-6413	Diagnoses - secondary ICD10: N73.6 Female pelvic peritoneal adhesions || id:ukb-b-6413	1-palmitoleoyl-gpc (16:1)*	Inverse variance weighted	5	-0.00320798	0.000593237	6.38784e-08	-5.40759	Diagnoses - secondary ICD10: N73.6 Female pelvic peritoneal adhesions
XepNL9	ukb-b-6413	Diagnoses - secondary ICD10: N73.6 Female pelvic peritoneal adhesions || id:ukb-b-6413	stearoylcarnitine (c18)	Inverse variance weighted	5	-0.00301228	0.000557046	6.38784e-08	-5.40759	Diagnoses - secondary ICD10: N73.6 Female pelvic peritoneal adhesions
rUAE8f	ukb-b-6413	Diagnoses - secondary ICD10: N73.6 Female pelvic peritoneal adhesions || id:ukb-b-6413	2-palmitoyl-gpc (16:0)*	Inverse variance weighted	5	-0.00273018	0.00050488	6.38784e-08	-5.40759	Diagnoses - secondary ICD10: N73.6 Female pelvic peritoneal adhesions
QMv5JG	ukb-b-6413	Diagnoses - secondary ICD10: N73.6 Female pelvic peritoneal adhesions || id:ukb-b-6413	1-(1-enyl-palmitoyl)-gpc (p-16:0)*	Inverse variance weighted	5	-0.00266689	0.000493175	6.38784e-08	-5.40759	Diagnoses - secondary ICD10: N73.6 Female pelvic peritoneal adhesions
APGVyT	ieu-a-965	Lung adenocarcinoma || id:ieu-a-965	docosatrienoate (22:3n6)*	Inverse variance weighted	3	0.428177	0.0792175	6.47779e-08	5.40508	Lung adenocarcinoma
wIwobu	ieu-a-1126	Breast cancer (Combined Oncoarray; iCOGS; GWAS meta analysis) || id:ieu-a-1126	arachidoylcarnitine (c20)*	Wald ratio	1	-0.262593	0.0485992	6.5453e-08	-5.40323	Breast cancer (Combined Oncoarray; iCOGS; GWAS meta analysis)
dTGzGo	ieu-a-1126	Breast cancer (Combined Oncoarray; iCOGS; GWAS meta analysis) || id:ieu-a-1126	(n(1) + n(8))-acetylspermidine	Inverse variance weighted	5	0.0644546	0.0119315	6.58869e-08	5.40204	Breast cancer (Combined Oncoarray; iCOGS; GWAS meta analysis)
Jjonf2	ukb-a-248	Body mass index (BMI) || id:ukb-a-248	pc aa c42:4	Inverse variance weighted	4	-0.142582	0.026401	6.64177e-08	-5.4006	Body mass index (BMI)
wDMryM	ukb-a-248	Body mass index (BMI) || id:ukb-a-248	nisinate (24:6n3)	Inverse variance weighted	4	-0.0436642	0.00808507	6.64177e-08	-5.4006	Body mass index (BMI)
43IJl3	ukb-a-248	Body mass index (BMI) || id:ukb-a-248	stearidonate (18:4n3)	Inverse variance weighted	4	-0.0560923	0.0103863	6.64177e-08	-5.4006	Body mass index (BMI)
iCT5wr	ukb-b-13745	Irritability || id:ukb-b-13745	1-palmitoyl-2-meadoyl-gpc (16:0/20:3n9)	Wald ratio	1	-0.0156291	0.00289527	6.73292e-08	-5.39816	Irritability
LWKVFP	ukb-b-20078	Non-cancer illness code, self-reported: gastric/stomach ulcers || id:ukb-b-20078	pc ae c34:2	Inverse variance weighted	7	0.00284684	0.000527443	6.75951e-08	5.39745	Non-cancer illness code, self-reported: gastric/stomach ulcers
lHeMAV	ieu-a-1095	Age at menarche || id:ieu-a-1095	x-18886	Inverse variance weighted	4	-0.153628	0.0284632	6.76058e-08	-5.39742	Age at menarche
EtaXQu	ukb-b-20464	Doctor diagnosed COPD (chronic obstructive pulmonary disease) || id:ukb-b-20464	levulinoylcarnitine	Inverse variance weighted	5	-0.0105912	0.0019623	6.7624e-08	-5.39737	Doctor diagnosed COPD (chronic obstructive pulmonary disease)
WOVtLu	ukb-b-8720	Non-cancer illness code, self-reported: pernicious anaemia || id:ukb-b-8720	x-19141	Inverse variance weighted	3	-0.000502406	9.31145e-05	6.83062e-08	-5.39557	Non-cancer illness code, self-reported: pernicious anaemia
TTnewX	ukb-b-8720	Non-cancer illness code, self-reported: pernicious anaemia || id:ukb-b-8720	5alpha-androstan-3alpha,17alpha-diol monosulfate	Inverse variance weighted	3	0.00138928	0.000257486	6.83062e-08	5.39557	Non-cancer illness code, self-reported: pernicious anaemia
wKhDXZ	ukb-b-8720	Non-cancer illness code, self-reported: pernicious anaemia || id:ukb-b-8720	deoxycholic acid glucuronide	Inverse variance weighted	3	-0.000464882	8.61599e-05	6.83062e-08	-5.39557	Non-cancer illness code, self-reported: pernicious anaemia
mVFSpO	ukb-b-19732	Non-cancer illness code, self-reported: hypothyroidism/myxoedema || id:ukb-b-19732	pc ae c30:2	Wald ratio	1	0.0234685	0.00435099	6.89714e-08	5.39383	Non-cancer illness code, self-reported: hypothyroidism/myxoedema
872gnc	ukb-b-18113	Non-cancer illness code, self-reported: asthma || id:ukb-b-18113	lysopc a c26:0	Wald ratio	1	-0.0277853	0.00515261	6.94968e-08	-5.39247	Non-cancer illness code, self-reported: asthma
nbhiB0	ieu-a-1102	Chronic kidney disease || id:ieu-a-1102	n-acetyl-1-methylhistidine*	Inverse variance weighted	8	-0.0485266	0.00900321	7.04869e-08	-5.38993	Chronic kidney disease
EtaXQu	ukb-b-12849	Mouth/teeth dental problems: Loose teeth || id:ukb-b-12849	levulinoylcarnitine	Inverse variance weighted	6	-0.00726974	0.00134898	7.08195e-08	-5.38908	Mouth/teeth dental problems: Loose teeth
y2VOfs	ieu-a-12	Crohn's disease || id:ieu-a-12	kynurenine	Wald ratio	1	0.601054	0.111583	7.18045e-08	5.3866	Crohn's disease
HKgzs7	ieu-a-1052	Transferrin || id:ieu-a-1052	valine	Inverse variance weighted	6	-0.343546	0.063785	7.20431e-08	-5.386	Transferrin
zr85p3	ieu-a-1006	Mean platelet volume || id:ieu-a-1006	sm (oh) c16:1	Inverse variance weighted	10	0.0263552	0.00489455	7.26031e-08	5.38461	Mean platelet volume
NODGtq	ukb-b-1668	Diagnoses - main ICD10: I25.1 Atherosclerotic heart disease || id:ukb-b-1668	1-stearoyl-2-docosahexaenoyl-gpe (18:0/22:6)*	Inverse variance weighted	3	0.00360203	0.000669739	7.52063e-08	5.37827	Diagnoses - main ICD10: I25.1 Atherosclerotic heart disease
pMUepz	ukb-b-1668	Diagnoses - main ICD10: I25.1 Atherosclerotic heart disease || id:ukb-b-1668	1-palmitoyl-2-docosahexaenoyl-gpe (16:0/22:6)*	Inverse variance weighted	3	0.00266727	0.000495935	7.52063e-08	5.37827	Diagnoses - main ICD10: I25.1 Atherosclerotic heart disease
yP3AT0	ukb-a-360	Systolic blood pressure automated reading || id:ukb-a-360	succinylcarnitine (c4-dc)	Wald ratio	1	0.0390113	0.00725555	7.58424e-08	5.37675	Systolic blood pressure automated reading
iMELqp	ukb-a-337	Forced expiratory volume in 1-second (FEV1) || id:ukb-a-337	galactonate	Wald ratio	1	-0.109782	0.0204363	7.79098e-08	-5.3719	Forced expiratory volume in 1-second (FEV1)
l5hheq	ieu-a-1110	Large vessel disease || id:ieu-a-1110	pc ae c36:2	Inverse variance weighted	8	-0.551385	0.102664	7.84032e-08	-5.37077	Large vessel disease
0Q9zX1	ukb-a-569	Diagnoses - main ICD10: M54 Dorsalgia || id:ukb-a-569	5-hydroxy-2-methylpyridine sulfate	Inverse variance weighted	3	0.00914438	0.00170318	7.91764e-08	5.369	Diagnoses - main ICD10: M54 Dorsalgia
JDcypK	ukb-a-569	Diagnoses - main ICD10: M54 Dorsalgia || id:ukb-a-569	5-acetylamino-6-amino-3-methyluracil	Inverse variance weighted	3	0.00901972	0.00167996	7.91764e-08	5.369	Diagnoses - main ICD10: M54 Dorsalgia
43IJl3	ukb-b-16858	Cough on most days || id:ukb-b-16858	stearidonate (18:4n3)	Inverse variance weighted	4	0.0335162	0.00624991	8.19974e-08	5.36268	Cough on most days
asDsn2	ieu-a-996	Eczema || id:ieu-a-996	lysopc a c24:0	Inverse variance weighted	2	-0.545093	0.101716	8.36852e-08	-5.359	Eczema
QWQYgL	ieu-a-1126	Breast cancer (Combined Oncoarray; iCOGS; GWAS meta analysis) || id:ieu-a-1126	valerylcarnitine	Inverse variance weighted	3	-0.125807	0.0234783	8.39369e-08	-5.35845	Breast cancer (Combined Oncoarray; iCOGS; GWAS meta analysis)
S26sfX	ukb-b-1968	Diagnoses - main ICD10: K63.5 Polyp of colon || id:ukb-b-1968	1-oleoyl-2-eicosapentaenoyl-gpc (18:1/20:5)	Inverse variance weighted	4	0.00228609	0.000426652	8.4053e-08	5.3582	Diagnoses - main ICD10: K63.5 Polyp of colon
6dKi35	ukb-b-12722	Non-cancer illness code, self-reported: uterine fibroids || id:ukb-b-12722	dodecenoylcarnitine	Inverse variance weighted	3	-0.00790312	0.00147545	8.48961e-08	-5.3564	Non-cancer illness code, self-reported: uterine fibroids
6T0f3G	ukb-b-12722	Non-cancer illness code, self-reported: uterine fibroids || id:ukb-b-12722	pimelylcarnitine	Inverse variance weighted	3	-0.00854504	0.0015953	8.48961e-08	-5.3564	Non-cancer illness code, self-reported: uterine fibroids
t27zLw	ukb-b-17400	Snoring || id:ukb-b-17400	n-acetyl-isoputreanine	Inverse variance weighted	5	-0.00863107	0.0016116	8.52789e-08	-5.35559	Snoring
2oML2Z	ukb-a-9	Sleep duration || id:ukb-a-9	1-methyl-4-imidazoleacetate	Inverse variance weighted	3	0.0170472	0.00318352	8.56392e-08	5.35483	Sleep duration
oJZ87S	ieu-a-1050	Ferritin || id:ieu-a-1050	n-acetyl-2-aminoadipate	Inverse variance weighted	3	-0.0850332	0.0158833	8.62158e-08	-5.35361	Ferritin
u0mbPU	ieu-a-1050	Ferritin || id:ieu-a-1050	methionine sulfone	Inverse variance weighted	3	0.0788059	0.0147201	8.62158e-08	5.35361	Ferritin
3HuuGR	ieu-a-1050	Ferritin || id:ieu-a-1050	2-aminooctanoate	Inverse variance weighted	3	0.0628319	0.0117364	8.62158e-08	5.35361	Ferritin
M0hsC1	ukb-b-18275	Hearing difficulty/problems with background noise || id:ukb-b-18275	sphingomyelin (d18:1/25:0, d19:0/24:1, d20:1/23:0, d19:1/24:0)*	Inverse variance weighted	6	-0.00644733	0.00120475	8.71752e-08	-5.35161	Hearing difficulty/problems with background noise
LWKVFP	ukb-b-7444	Diagnoses - main ICD10: I84.8 Unspecified haemorrhoids with other complications || id:ukb-b-7444	pc ae c34:2	Inverse variance weighted	7	-0.00235925	0.000440973	8.79076e-08	-5.3501	Diagnoses - main ICD10: I84.8 Unspecified haemorrhoids with other complications
2ccX6r	ukb-b-13704	Blood clot, DVT, bronchitis, emphysema, asthma, rhinitis, eczema, allergy diagnosed by doctor: Blood clot in the lung || id:ukb-b-13704	x-24241	Inverse variance weighted	6	-0.00127339	0.000238052	8.83511e-08	-5.34919	Blood clot, DVT, bronchitis, emphysema, asthma, rhinitis, eczema, allergy diagnosed by doctor: Blood clot in the lung
yKwhnv	ieu-a-29	Birth length || id:ieu-a-29	sphingomyelin (d18:1/21:0, d17:1/22:0, d16:1/23:0)*	Inverse variance weighted	5	-0.155688	0.0291058	8.84292e-08	-5.34903	Birth length
EnI8Rf	ieu-a-833	Rheumatoid arthritis || id:ieu-a-833	x-11381	Inverse variance weighted	3	0.293024	0.0547901	8.88767e-08	5.34811	Rheumatoid arthritis
wIwobu	ieu-a-1127	ER+ Breast cancer (Combined Oncoarray; iCOGS; GWAS meta analysis) || id:ieu-a-1127	arachidoylcarnitine (c20)*	Wald ratio	1	-0.314327	0.0587894	8.95888e-08	-5.34667	ER+ Breast cancer (Combined Oncoarray; iCOGS; GWAS meta analysis)
tmG8Pq	ukb-b-17324	Eye problems/disorders: Glaucoma || id:ukb-b-17324	nervonoylcarnitine (c24:1)*	Inverse variance weighted	9	0.0101221	0.00189348	9.00314e-08	5.34577	Eye problems/disorders: Glaucoma
INxudw	ukb-b-4637	Diagnoses - main ICD10: H00.1 Chalazion || id:ukb-b-4637	pc aa c30:0	Inverse variance weighted	2	0.00616958	0.00115413	9.00964e-08	5.34564	Diagnoses - main ICD10: H00.1 Chalazion
asDsn2	ukb-b-4637	Diagnoses - main ICD10: H00.1 Chalazion || id:ukb-b-4637	lysopc a c24:0	Inverse variance weighted	2	0.00353667	0.000661599	9.00964e-08	5.34564	Diagnoses - main ICD10: H00.1 Chalazion
tc8Ebq	ieu-a-12	Crohn's disease || id:ieu-a-12	1-palmitoyl-2-arachidonoyl-gpi (16:0/20:4)*	Wald ratio	1	-0.618447	0.115734	9.10817e-08	-5.34367	Crohn's disease
boBryA	ukb-b-14177	Vascular/heart problems diagnosed by doctor: High blood pressure || id:ukb-b-14177	tiglylcarnitine (c5:1-dc)	Inverse variance weighted	3	-0.0228186	0.00427254	9.25555e-08	-5.34076	Vascular/heart problems diagnosed by doctor: High blood pressure
hBsfNx	ukb-b-14177	Vascular/heart problems diagnosed by doctor: High blood pressure || id:ukb-b-14177	4-androsten-3alpha,17alpha-diol monosulfate (3)	Inverse variance weighted	2	0.00780613	0.0014622	9.36648e-08	5.3386	Vascular/heart problems diagnosed by doctor: High blood pressure
DVBQgr	ukb-b-9536	Diagnoses - main ICD10: D25.9 Leiomyoma of uterus, unspecified || id:ukb-b-9536	1-palmitoyl-2-arachidonoyl-gpe (16:0/20:4)*	Inverse variance weighted	5	-0.00439651	0.000823536	9.3681e-08	-5.33857	Diagnoses - main ICD10: D25.9 Leiomyoma of uterus, unspecified
PwKKlE	ieu-a-1041	Intracranial volume || id:ieu-a-1041	pc aa c38:3	Inverse variance weighted	11	26118.4	4894.31	9.47675e-08	5.33648	Intracranial volume
asDsn2	ukb-b-11411	Blood clot, DVT, bronchitis, emphysema, asthma, rhinitis, eczema, allergy diagnosed by doctor: Blood clot in the leg (DVT) || id:ukb-b-11411	lysopc a c24:0	Inverse variance weighted	2	0.00865269	0.00162178	9.53925e-08	5.33529	Blood clot, DVT, bronchitis, emphysema, asthma, rhinitis, eczema, allergy diagnosed by doctor: Blood clot in the leg (DVT)
INxudw	ukb-b-11411	Blood clot, DVT, bronchitis, emphysema, asthma, rhinitis, eczema, allergy diagnosed by doctor: Blood clot in the leg (DVT) || id:ukb-b-11411	pc aa c30:0	Inverse variance weighted	2	0.0150943	0.00282914	9.53925e-08	5.33529	Blood clot, DVT, bronchitis, emphysema, asthma, rhinitis, eczema, allergy diagnosed by doctor: Blood clot in the leg (DVT)
i2qdKV	ieu-a-89	Height || id:ieu-a-89	n-acetyl-aspartyl-glutamate (naag)	Wald ratio	1	-0.0277227	0.00519801	9.64261e-08	-5.33333	Height
vFNJn7	ieu-a-1004	Age at menopause || id:ieu-a-1004	gamma-glutamyltyrosine	Wald ratio	1	0.847215	0.158853	9.64261e-08	5.33333	Age at menopause
yP3AT0	ieu-a-89	Height || id:ieu-a-89	succinylcarnitine (c4-dc)	Wald ratio	1	-0.0471222	0.00883541	9.64261e-08	-5.33333	Height
LnxdHc	ukb-b-14177	Vascular/heart problems diagnosed by doctor: High blood pressure || id:ukb-b-14177	3-hydroxyoleoylcarnitine	Wald ratio	1	0.0409369	0.00767649	9.67301e-08	5.33276	Vascular/heart problems diagnosed by doctor: High blood pressure
43IJl3	ukb-b-15003	Diagnoses - main ICD10: L72.0 Epidermal cyst || id:ukb-b-15003	stearidonate (18:4n3)	Inverse variance weighted	4	0.00303363	0.000569196	9.83954e-08	5.32966	Diagnoses - main ICD10: L72.0 Epidermal cyst
hfQrfn	ukb-b-5018	Diagnoses - main ICD10: K61.0 Anal abscess || id:ukb-b-5018	pc ae c38:2	Inverse variance weighted	8	-0.00129277	0.000242627	9.91929e-08	-5.3282	Diagnoses - main ICD10: K61.0 Anal abscess
LWKVFP	ieu-a-1110	Large vessel disease || id:ieu-a-1110	pc ae c34:2	Inverse variance weighted	7	-0.571104	0.107221	1.00155e-07	-5.32644	Large vessel disease
ja11jX	ieu-a-12	Crohn's disease || id:ieu-a-12	1-stearoyl-2-oleoyl-gpi (18:0/18:1)*	Wald ratio	1	-0.465268	0.0873566	1.00357e-07	-5.32608	Crohn's disease
5WEKgE	ieu-a-982	Lumbar spine bone mineral density || id:ieu-a-982	pc ae c36:3	Inverse variance weighted	8	0.0863588	0.0162161	1.0067e-07	5.32551	Lumbar spine bone mineral density
INxudw	ukb-a-9	Sleep duration || id:ukb-a-9	pc aa c30:0	Inverse variance weighted	2	-0.095863	0.0180043	1.0126e-07	-5.32445	Sleep duration
kQOE8e	ieu-a-1097	Microalbuminuria || id:ieu-a-1097	sphingomyelin (d18:1/19:0, d19:1/18:0)*	Inverse variance weighted	5	-0.249781	0.0469164	1.01526e-07	-5.32397	Microalbuminuria
yKwhnv	ieu-a-1097	Microalbuminuria || id:ieu-a-1097	sphingomyelin (d18:1/21:0, d17:1/22:0, d16:1/23:0)*	Inverse variance weighted	5	-0.319032	0.0599237	1.01526e-07	-5.32397	Microalbuminuria
8Z7QaZ	ukb-a-337	Forced expiratory volume in 1-second (FEV1) || id:ukb-a-337	x-12688	Wald ratio	1	0.0314633	0.00591401	1.03697e-07	5.32012	Forced expiratory volume in 1-second (FEV1)
j2spA0	ukb-a-9	Sleep duration || id:ukb-a-9	5alpha-androstan-3beta,17beta-diol monosulfate (2)	Inverse variance weighted	2	0.0609888	0.0114648	1.03969e-07	5.31965	Sleep duration
A600du	ukb-b-18994	Miserableness || id:ukb-b-18994	pc aa c26:0	Inverse variance weighted	2	0.0412768	0.00776061	1.04477e-07	5.31876	Miserableness
5WEKgE	ieu-a-967	Squamous cell lung cancer || id:ieu-a-967	pc ae c36:3	Inverse variance weighted	8	-0.251715	0.0473325	1.04906e-07	-5.31801	Squamous cell lung cancer
53K1qO	ieu-a-89	Height || id:ieu-a-89	n-oleoyltaurine	Inverse variance weighted	3	-0.0773344	0.0145428	1.05087e-07	-5.3177	Height
9nmvGu	ieu-a-89	Height || id:ieu-a-89	glycoursodeoxycholic acid sulfate (1)	Inverse variance weighted	3	-0.0684045	0.0128636	1.05087e-07	-5.3177	Height
9OGLOV	ieu-a-89	Height || id:ieu-a-89	1-palmitoyl-gpg (16:0)*	Inverse variance weighted	3	-0.0474189	0.00891719	1.05087e-07	-5.3177	Height
9wg2kh	ieu-a-89	Height || id:ieu-a-89	1-arachidonoyl-gpe (20:4n6)*	Inverse variance weighted	3	-0.042955	0.00807774	1.05087e-07	-5.3177	Height
DaRI8K	ieu-a-275	Red blood cell count || id:ieu-a-275	hydroxypalmitoyl sphingomyelin (d18:1/16:0(oh))**	Inverse variance weighted	2	0.0333957	0.00628041	1.05236e-07	5.31744	Red blood cell count
wkLuzs	ukb-b-20213	Non-cancer illness code, self-reported: measles / morbillivirus || id:ukb-b-20213	behenoyl dihydrosphingomyelin (d18:0/22:0)*	Inverse variance weighted	5	-0.0024591	0.000462687	1.06759e-07	-5.31483	Non-cancer illness code, self-reported: measles / morbillivirus
8Ye82N	ukb-b-14177	Vascular/heart problems diagnosed by doctor: High blood pressure || id:ukb-b-14177	cysteinylglycine	Wald ratio	1	0.0205844	0.00387328	1.06968e-07	5.31447	Vascular/heart problems diagnosed by doctor: High blood pressure
rDX1yu	ukb-a-248	Body mass index (BMI) || id:ukb-a-248	7-alpha-hydroxy-3-oxo-4-cholestenoate (7-hoca)	Inverse variance weighted	3	-0.0701348	0.0132169	1.11777e-07	-5.30646	Body mass index (BMI)
LX5R3P	ukb-b-16781	Diagnoses - main ICD10: G47.3 Sleep apnoea || id:ukb-b-16781	n2-acetyl,n6,n6-dimethyllysine	Inverse variance weighted	10	-0.00030127	5.68067e-05	1.13651e-07	-5.30342	Diagnoses - main ICD10: G47.3 Sleep apnoea
POVlM6	ukb-a-360	Systolic blood pressure automated reading || id:ukb-a-360	hexanoylcarnitine (c6)	Inverse variance weighted	5	0.0161311	0.00304194	1.1398e-07	5.3029	Systolic blood pressure automated reading
asDsn2	ukb-b-12040	Non-cancer illness code, self-reported: deep venous thrombosis (dvt) || id:ukb-b-12040	lysopc a c24:0	Inverse variance weighted	2	0.008487	0.00160176	1.1672e-07	5.29856	Non-cancer illness code, self-reported: deep venous thrombosis (dvt)
INxudw	ukb-b-12040	Non-cancer illness code, self-reported: deep venous thrombosis (dvt) || id:ukb-b-12040	pc aa c30:0	Inverse variance weighted	2	0.0148052	0.0027942	1.1672e-07	5.29856	Non-cancer illness code, self-reported: deep venous thrombosis (dvt)
S5i23A	ukb-b-14486	Non-cancer illness code, self-reported: osteoarthritis || id:ukb-b-14486	pc ae c42:3	Inverse variance weighted	12	-0.00882272	0.00166567	1.17854e-07	-5.29679	Non-cancer illness code, self-reported: osteoarthritis
t27zLw	ukb-b-5590	Diagnoses - main ICD10: K92.1 Melaena || id:ukb-b-5590	n-acetyl-isoputreanine	Inverse variance weighted	5	0.000928834	0.0001754	1.18679e-07	5.29552	Diagnoses - main ICD10: K92.1 Melaena
yK15mu	ieu-a-23	Type 2 diabetes || id:ieu-a-23	sm c18:1	Inverse variance weighted	6	0.335687	0.0633972	1.19028e-07	5.29498	Type 2 diabetes
LnxdHc	ieu-a-1008	Platelet count || id:ieu-a-1008	3-hydroxyoleoylcarnitine	Wald ratio	1	17.6971	3.34421	1.21089e-07	5.29184	Platelet count
APGVyT	ieu-a-977	Forearm bone mineral density || id:ieu-a-977	docosatrienoate (22:3n6)*	Inverse variance weighted	3	-0.259966	0.0491363	1.21848e-07	-5.2907	Forearm bone mineral density
boBryA	ukb-a-248	Body mass index (BMI) || id:ukb-a-248	tiglylcarnitine (c5:1-dc)	Inverse variance weighted	3	-0.0597511	0.0112954	1.22401e-07	-5.28987	Body mass index (BMI)
EnI8Rf	ukb-b-4637	Diagnoses - main ICD10: H00.1 Chalazion || id:ukb-b-4637	x-11381	Inverse variance weighted	3	-0.00263231	0.000498029	1.25393e-07	-5.28546	Diagnoses - main ICD10: H00.1 Chalazion
rzcVcK	ieu-a-1008	Platelet count || id:ieu-a-1008	1-(1-enyl-stearoyl)-2-linoleoyl-gpe (p-18:0/18:2)*	Inverse variance weighted	7	9.29751	1.7608	1.28982e-07	5.28029	Platelet count
boBryA	ieu-a-1126	Breast cancer (Combined Oncoarray; iCOGS; GWAS meta analysis) || id:ieu-a-1126	tiglylcarnitine (c5:1-dc)	Inverse variance weighted	3	-0.153024	0.028982	1.29211e-07	-5.27996	Breast cancer (Combined Oncoarray; iCOGS; GWAS meta analysis)
5dzcey	ukb-a-360	Systolic blood pressure automated reading || id:ukb-a-360	sm c24:0	Inverse variance weighted	5	0.084821	0.0160713	1.30743e-07	5.2778	Systolic blood pressure automated reading
Z2SbbQ	ukb-a-360	Systolic blood pressure automated reading || id:ukb-a-360	sm (oh) c22:2	Inverse variance weighted	5	0.087049	0.0164934	1.30743e-07	5.2778	Systolic blood pressure automated reading
MInmoG	ukb-a-337	Forced expiratory volume in 1-second (FEV1) || id:ukb-a-337	1-(1-enyl-palmitoyl)-2-arachidonoyl-gpe (p-16:0/20:4)*	Inverse variance weighted	5	0.020846	0.00395076	1.31709e-07	5.27645	Forced expiratory volume in 1-second (FEV1)
FKmEyJ	ukb-b-17400	Snoring || id:ukb-b-17400	lysopc a c20:3	Inverse variance weighted	6	-0.0133453	0.00253049	1.33621e-07	-5.27381	Snoring
S26sfX	ukb-b-15003	Diagnoses - main ICD10: L72.0 Epidermal cyst || id:ukb-b-15003	1-oleoyl-2-eicosapentaenoyl-gpc (18:1/20:5)	Inverse variance weighted	4	0.0014088	0.000267275	1.35684e-07	5.271	Diagnoses - main ICD10: L72.0 Epidermal cyst
4JEO0C	ukb-b-18275	Hearing difficulty/problems with background noise || id:ukb-b-18275	sphingomyelin (d18:0/20:0, d16:0/22:0)*	Inverse variance weighted	11	-0.007686	0.00145834	1.36135e-07	-5.27039	Hearing difficulty/problems with background noise
gd6GcQ	ieu-a-7	Coronary heart disease || id:ieu-a-7	pc ae c42:5	Inverse variance weighted	3	-0.542487	0.102996	1.3863e-07	-5.26705	Coronary heart disease
pIPOXX	ieu-a-7	Coronary heart disease || id:ieu-a-7	pc ae c38:6	Inverse variance weighted	3	-0.372676	0.0707561	1.3863e-07	-5.26705	Coronary heart disease
hfQrfn	ukb-a-336	Forced vital capacity (FVC) || id:ukb-a-336	pc ae c38:2	Inverse variance weighted	8	-0.0256452	0.00487375	1.42565e-07	-5.26191	Forced vital capacity (FVC)
3svHQm	ukb-b-18113	Non-cancer illness code, self-reported: asthma || id:ukb-b-18113	sphingomyelin (d18:2/23:0, d18:1/23:1, d17:1/24:1)*	Wald ratio	1	0.0400707	0.0076213	1.45852e-07	5.25772	Non-cancer illness code, self-reported: asthma
OpyDWy	ukb-a-359	Diastolic blood pressure automated reading || id:ukb-a-359	x-12095--n1-methyl-3-pyridone-4-carboxamide	Wald ratio	1	0.748989	0.142543	1.48439e-07	5.25449	Diastolic blood pressure automated reading
rSRC7J	ukb-b-12930	Mouth/teeth dental problems: Dentures || id:ukb-b-12930	x-25790	Wald ratio	1	0.034955	0.00665842	1.52312e-07	5.24974	Mouth/teeth dental problems: Dentures
nIZCVe	ukb-b-17324	Eye problems/disorders: Glaucoma || id:ukb-b-17324	n-acetylglucosamine/n-acetylgalactosamine	Inverse variance weighted	3	-0.0101056	0.0019251	1.52606e-07	-5.24939	Eye problems/disorders: Glaucoma
bPljxg	ukb-b-17241	Blood clot, DVT, bronchitis, emphysema, asthma, rhinitis, eczema, allergy diagnosed by doctor: Hayfever, allergic rhinitis or eczema || id:ukb-b-17241	x-10395	Wald ratio	1	0.294381	0.0560889	1.5337e-07	5.24847	Blood clot, DVT, bronchitis, emphysema, asthma, rhinitis, eczema, allergy diagnosed by doctor: Hayfever, allergic rhinitis or eczema
S1s8Er	ieu-a-966	Lung cancer || id:ieu-a-966	linoleoyl-arachidonoyl-glycerol (18:2/20:4) [1]*	Inverse variance weighted	6	0.180422	0.0343806	1.5395e-07	5.24777	Lung cancer
dVokOy	ukb-b-14177	Vascular/heart problems diagnosed by doctor: High blood pressure || id:ukb-b-14177	n-acetylcitrulline	Inverse variance weighted	5	0.00253539	0.000483238	1.54879e-07	5.24666	Vascular/heart problems diagnosed by doctor: High blood pressure
ypYPNn	ieu-a-1041	Intracranial volume || id:ieu-a-1041	pc aa c32:2	Inverse variance weighted	6	35451.7	6758.16	1.55635e-07	5.24576	Intracranial volume
DaRI8K	ieu-a-273	Mean cell volume || id:ieu-a-273	hydroxypalmitoyl sphingomyelin (d18:1/16:0(oh))**	Inverse variance weighted	2	-0.404081	0.0770369	1.56038e-07	-5.24529	Mean cell volume
GymZxp	ieu-a-801	Bipolar disorder || id:ieu-a-801	3-hydroxybutyroylglycine**	Inverse variance weighted	6	-0.430892	0.0821604	1.56689e-07	-5.24452	Bipolar disorder
bnD2Ym	ieu-a-275	Red blood cell count || id:ieu-a-275	1-palmitoyl-2-alpha-linolenoyl-gpc (16:0/18:3n3)	Inverse variance weighted	2	0.025734	0.00490697	1.56813e-07	5.24438	Red blood cell count
S5i23A	ukb-b-8476	Loneliness, isolation || id:ukb-b-8476	pc ae c42:3	Inverse variance weighted	12	-0.0122586	0.00233762	1.5709e-07	-5.24405	Loneliness, isolation
6l7DTh	ukb-b-17241	Blood clot, DVT, bronchitis, emphysema, asthma, rhinitis, eczema, allergy diagnosed by doctor: Hayfever, allergic rhinitis or eczema || id:ukb-b-17241	sm c16:0	Inverse variance weighted	20	0.0175822	0.00335292	1.57255e-07	5.24386	Blood clot, DVT, bronchitis, emphysema, asthma, rhinitis, eczema, allergy diagnosed by doctor: Hayfever, allergic rhinitis or eczema
IUlYa2	ieu-a-967	Squamous cell lung cancer || id:ieu-a-967	1-eicosapentaenoyl-gpc (20:5)	Inverse variance weighted	3	0.325804	0.0621315	1.57314e-07	5.24379	Squamous cell lung cancer
YaFAh6	ieu-a-999	Body fat || id:ieu-a-999	pc aa c36:4	Inverse variance weighted	8	0.101417	0.0193428	1.57887e-07	5.24312	Body fat
S5i23A	ukb-b-2964	Diagnoses - secondary ICD10: F17.1 Harmful use || id:ukb-b-2964	pc ae c42:3	Inverse variance weighted	10	0.00187472	0.000357946	1.62818e-07	5.23744	Diagnoses - secondary ICD10: F17.1 Harmful use
LnxdHc	ukb-a-249	Weight || id:ukb-a-249	3-hydroxyoleoylcarnitine	Wald ratio	1	-0.093894	0.0179328	1.642e-07	-5.23588	Weight
18Ttub	ukb-b-1668	Diagnoses - main ICD10: I25.1 Atherosclerotic heart disease || id:ukb-b-1668	pc ae c36:5	Inverse variance weighted	3	0.0134262	0.00256556	1.66568e-07	5.23324	Diagnoses - main ICD10: I25.1 Atherosclerotic heart disease
5zHKRp	ukb-b-1668	Diagnoses - main ICD10: I25.1 Atherosclerotic heart disease || id:ukb-b-1668	pc ae c42:4	Inverse variance weighted	3	0.014663	0.00280191	1.66568e-07	5.23324	Diagnoses - main ICD10: I25.1 Atherosclerotic heart disease
LRHmmp	ieu-a-7	Coronary heart disease || id:ieu-a-7	glycine	Inverse variance weighted	20	-0.413604	0.079042	1.67039e-07	-5.23271	Coronary heart disease
DVBQgr	ieu-a-798	Myocardial infarction || id:ieu-a-798	1-palmitoyl-2-arachidonoyl-gpe (16:0/20:4)*	Inverse variance weighted	5	0.192563	0.0368058	1.67793e-07	5.23188	Myocardial infarction
S26sfX	ukb-b-6458	Mouth/teeth dental problems: Mouth ulcers || id:ukb-b-6458	1-oleoyl-2-eicosapentaenoyl-gpc (18:1/20:5)	Inverse variance weighted	4	-0.0066917	0.00127914	1.68216e-07	-5.23142	Mouth/teeth dental problems: Mouth ulcers
MInmoG	ieu-a-965	Lung adenocarcinoma || id:ieu-a-965	1-(1-enyl-palmitoyl)-2-arachidonoyl-gpe (p-16:0/20:4)*	Inverse variance weighted	5	0.253413	0.0484406	1.68226e-07	5.23141	Lung adenocarcinoma
IUlYa2	ukb-a-336	Forced vital capacity (FVC) || id:ukb-a-336	1-eicosapentaenoyl-gpc (20:5)	Inverse variance weighted	3	0.0252989	0.00483601	1.68265e-07	5.23136	Forced vital capacity (FVC)
bl5GIW	ukb-a-336	Forced vital capacity (FVC) || id:ukb-a-336	1-palmitoyl-2-eicosapentaenoyl-gpc (16:0/20:5)	Inverse variance weighted	3	0.0258553	0.00494236	1.68265e-07	5.23136	Forced vital capacity (FVC)
Bm6jSv	ukb-a-336	Forced vital capacity (FVC) || id:ukb-a-336	1-dihomo-linolenoyl-gpe (20:3n3 or 6)	Inverse variance weighted	3	-0.0199617	0.00381577	1.68265e-07	-5.23136	Forced vital capacity (FVC)
EtaXQu	ukb-b-13704	Blood clot, DVT, bronchitis, emphysema, asthma, rhinitis, eczema, allergy diagnosed by doctor: Blood clot in the lung || id:ukb-b-13704	levulinoylcarnitine	Inverse variance weighted	5	-0.00381311	0.000729608	1.7299e-07	-5.22624	Blood clot, DVT, bronchitis, emphysema, asthma, rhinitis, eczema, allergy diagnosed by doctor: Blood clot in the lung
43IJl3	ieu-a-271	Mean cell haemoglobin || id:ieu-a-271	stearidonate (18:4n3)	Inverse variance weighted	4	0.239177	0.0457736	1.73943e-07	5.22523	Mean cell haemoglobin
wDMryM	ieu-a-271	Mean cell haemoglobin || id:ieu-a-271	nisinate (24:6n3)	Inverse variance weighted	4	0.186184	0.0356317	1.73943e-07	5.22523	Mean cell haemoglobin
B9a5pb	ukb-b-13535	Non-cancer illness code, self-reported: gestational hypertension/pre-eclampsia || id:ukb-b-13535	x-12112	Inverse variance weighted	7	-0.000281509	5.39119e-05	1.77327e-07	-5.22166	Non-cancer illness code, self-reported: gestational hypertension/pre-eclampsia
wDMryM	ieu-a-1108	Ischemic stroke || id:ieu-a-1108	nisinate (24:6n3)	Inverse variance weighted	4	0.279918	0.0536081	1.77425e-07	5.22156	Ischemic stroke
DVBQgr	ieu-a-1006	Mean platelet volume || id:ieu-a-1006	1-palmitoyl-2-arachidonoyl-gpe (16:0/20:4)*	Inverse variance weighted	3	0.0262264	0.00502391	1.78618e-07	5.22032	Mean platelet volume
BXlb26	ukb-b-8777	Cancer code, self-reported: cervical cancer || id:ukb-b-8777	x-12511	Inverse variance weighted	2	0.000884851	0.000169514	1.78986e-07	5.21994	Cancer code, self-reported: cervical cancer
CUf70N	ukb-b-8777	Cancer code, self-reported: cervical cancer || id:ukb-b-8777	2-ketocaprylate	Inverse variance weighted	2	-0.00197943	0.000379206	1.78986e-07	-5.21994	Cancer code, self-reported: cervical cancer
W1mNxI	ukb-a-359	Diastolic blood pressure automated reading || id:ukb-a-359	pc aa c34:2	Inverse variance weighted	5	0.0476239	0.00913016	1.82727e-07	5.2161	Diastolic blood pressure automated reading
biD8xJ	ieu-a-1108	Ischemic stroke || id:ieu-a-1108	pc aa c36:3	Inverse variance weighted	11	-0.175984	0.0337393	1.82845e-07	-5.21598	Ischemic stroke
AJO4EV	ukb-b-15251	Fracture resulting from simple fall || id:ukb-b-15251	pc aa c38:5	Inverse variance weighted	9	-0.0725819	0.0139193	1.8435e-07	-5.21446	Fracture resulting from simple fall
XjZgRS	ieu-a-1126	Breast cancer (Combined Oncoarray; iCOGS; GWAS meta analysis) || id:ieu-a-1126	carboxyethyl-gaba	Inverse variance weighted	4	-0.117732	0.0225882	1.86693e-07	-5.21212	Breast cancer (Combined Oncoarray; iCOGS; GWAS meta analysis)
n9Jq6X	ukb-a-249	Weight || id:ukb-a-249	x-23780	Inverse variance weighted	3	0.0314805	0.0060408	1.87501e-07	5.21132	Weight
A600du	ukb-a-359	Diastolic blood pressure automated reading || id:ukb-a-359	pc aa c26:0	Inverse variance weighted	2	0.0970778	0.0186286	1.87612e-07	5.21121	Diastolic blood pressure automated reading
nbhiB0	ieu-a-1005	Percent emphysema || id:ieu-a-1005	n-acetyl-1-methylhistidine*	Inverse variance weighted	8	-0.028524	0.00547402	1.8803e-07	-5.2108	Percent emphysema
S1s8Er	ieu-a-275	Red blood cell count || id:ieu-a-275	linoleoyl-arachidonoyl-glycerol (18:2/20:4) [1]*	Inverse variance weighted	5	-0.0240814	0.00462258	1.89321e-07	-5.20953	Red blood cell count
01Lweg	ukb-b-13535	Non-cancer illness code, self-reported: gestational hypertension/pre-eclampsia || id:ukb-b-13535	myristoyl dihydrosphingomyelin (d18:0/14:0)*	Inverse variance weighted	5	0.00172442	0.00033103	1.89598e-07	5.20926	Non-cancer illness code, self-reported: gestational hypertension/pre-eclampsia
KNvR7s	ukb-b-13535	Non-cancer illness code, self-reported: gestational hypertension/pre-eclampsia || id:ukb-b-13535	n-stearoyl-sphinganine (d18:0/18:0)*	Inverse variance weighted	5	0.00273866	0.000525729	1.89598e-07	5.20926	Non-cancer illness code, self-reported: gestational hypertension/pre-eclampsia
M0hsC1	ukb-b-13535	Non-cancer illness code, self-reported: gestational hypertension/pre-eclampsia || id:ukb-b-13535	sphingomyelin (d18:1/25:0, d19:0/24:1, d20:1/23:0, d19:1/24:0)*	Inverse variance weighted	5	0.000822439	0.00015788	1.89598e-07	5.20926	Non-cancer illness code, self-reported: gestational hypertension/pre-eclampsia
zr85p3	ukb-b-13535	Non-cancer illness code, self-reported: gestational hypertension/pre-eclampsia || id:ukb-b-13535	sm (oh) c16:1	Inverse variance weighted	5	0.00324484	0.000622899	1.89598e-07	5.20926	Non-cancer illness code, self-reported: gestational hypertension/pre-eclampsia
kv1XRO	ukb-a-359	Diastolic blood pressure automated reading || id:ukb-a-359	1-dihomo-linoleoyl-gpc (20:2)	Inverse variance weighted	2	0.0221556	0.00425323	1.89733e-07	5.20913	Diastolic blood pressure automated reading
u0mbPU	ukb-b-5712	Diagnoses - main ICD10: N95.0 Postmenopausal bleeding || id:ukb-b-5712	methionine sulfone	Inverse variance weighted	4	-0.00202533	0.000389092	1.93706e-07	-5.20528	Diagnoses - main ICD10: N95.0 Postmenopausal bleeding
Am2kMz	ukb-b-17324	Eye problems/disorders: Glaucoma || id:ukb-b-17324	n-acetylglucosaminylasparagine	Inverse variance weighted	4	0.00651716	0.00125223	1.94585e-07	5.20444	Eye problems/disorders: Glaucoma
QMv5JG	ukb-a-360	Systolic blood pressure automated reading || id:ukb-a-360	1-(1-enyl-palmitoyl)-gpc (p-16:0)*	Inverse variance weighted	5	0.0489373	0.00940667	1.96722e-07	5.20241	Systolic blood pressure automated reading
rUAE8f	ukb-a-360	Systolic blood pressure automated reading || id:ukb-a-360	2-palmitoyl-gpc (16:0)*	Inverse variance weighted	5	0.0500988	0.00962993	1.96722e-07	5.20241	Systolic blood pressure automated reading
XepNL9	ukb-a-360	Systolic blood pressure automated reading || id:ukb-a-360	stearoylcarnitine (c18)	Inverse variance weighted	5	0.0552752	0.0106249	1.96722e-07	5.20241	Systolic blood pressure automated reading
nbhiB0	ukb-b-14177	Vascular/heart problems diagnosed by doctor: High blood pressure || id:ukb-b-14177	n-acetyl-1-methylhistidine*	Inverse variance weighted	8	0.00269284	0.00051769	1.97535e-07	5.20164	Vascular/heart problems diagnosed by doctor: High blood pressure
lvJZsE	ukb-b-18994	Miserableness || id:ukb-b-18994	1-palmitoleoyl-gpc (16:1)*	Inverse variance weighted	7	0.0209779	0.00403404	1.99053e-07	5.20022	Miserableness
DcENoD	ukb-b-20078	Non-cancer illness code, self-reported: gastric/stomach ulcers || id:ukb-b-20078	asparagine	Inverse variance weighted	5	-0.00188973	0.000363396	1.99069e-07	-5.20021	Non-cancer illness code, self-reported: gastric/stomach ulcers
8Z7QaZ	ukb-b-3965	Diagnoses - main ICD10: G56.0 Carpal tunnel syndrome || id:ukb-b-3965	x-12688	Wald ratio	1	-0.00405648	0.000780395	2.01464e-07	-5.19798	Diagnoses - main ICD10: G56.0 Carpal tunnel syndrome
l5hheq	ieu-a-1120	Ovarian cancer || id:ieu-a-1120	pc ae c36:2	Inverse variance weighted	8	0.203014	0.0390613	2.02182e-07	5.19732	Ovarian cancer
bl5GIW	ieu-a-1000	Depressive symptoms || id:ieu-a-1000	1-palmitoyl-2-eicosapentaenoyl-gpc (16:0/20:5)	Inverse variance weighted	3	-0.0481829	0.0092728	2.03455e-07	-5.19615	Depressive symptoms
bl5GIW	ieu-a-1006	Mean platelet volume || id:ieu-a-1006	1-palmitoyl-2-eicosapentaenoyl-gpc (16:0/20:5)	Inverse variance weighted	3	0.0132503	0.00255002	2.03455e-07	5.19615	Mean platelet volume
Bm6jSv	ieu-a-1000	Depressive symptoms || id:ieu-a-1000	1-dihomo-linolenoyl-gpe (20:3n3 or 6)	Inverse variance weighted	3	0.0371998	0.00715911	2.03455e-07	5.19615	Depressive symptoms
Bm6jSv	ieu-a-1006	Mean platelet volume || id:ieu-a-1006	1-dihomo-linolenoyl-gpe (20:3n3 or 6)	Inverse variance weighted	3	-0.01023	0.00196876	2.03455e-07	-5.19615	Mean platelet volume
IUlYa2	ieu-a-1000	Depressive symptoms || id:ieu-a-1000	1-eicosapentaenoyl-gpc (20:5)	Inverse variance weighted	3	-0.0471461	0.00907327	2.03455e-07	-5.19615	Depressive symptoms
IUlYa2	ieu-a-1006	Mean platelet volume || id:ieu-a-1006	1-eicosapentaenoyl-gpc (20:5)	Inverse variance weighted	3	0.0129652	0.00249515	2.03455e-07	5.19615	Mean platelet volume
0VU7DP	ukb-b-16207	Blood clot, DVT, bronchitis, emphysema, asthma, rhinitis, eczema, allergy diagnosed by doctor: Emphysema/chronic bronchitis || id:ukb-b-16207	butyrylglycine	Inverse variance weighted	2	0.00202344	0.000389433	2.03787e-07	5.19585	Blood clot, DVT, bronchitis, emphysema, asthma, rhinitis, eczema, allergy diagnosed by doctor: Emphysema/chronic bronchitis
ypYPNn	ukb-b-7444	Diagnoses - main ICD10: I84.8 Unspecified haemorrhoids with other complications || id:ukb-b-7444	pc aa c32:2	Inverse variance weighted	6	-0.00272646	0.000524888	2.0542e-07	-5.19436	Diagnoses - main ICD10: I84.8 Unspecified haemorrhoids with other complications
OGSS27	ieu-a-1128	ER- Breast cancer (Combined Oncoarray; iCOGS; GWAS meta analysis) || id:ieu-a-1128	11beta-hydroxyandrosterone glucuronide	Inverse variance weighted	7	0.158762	0.0305768	2.07794e-07	5.19223	ER- Breast cancer (Combined Oncoarray; iCOGS; GWAS meta analysis)
KxAfEP	ukb-a-25	Alcohol intake frequency. || id:ukb-a-25	1-stearoyl-2-oleoyl-gpe (18:0/18:1)	Inverse variance weighted	7	-0.0370555	0.00713704	2.08042e-07	-5.192	Alcohol intake frequency.
bWJ7db	ieu-a-982	Lumbar spine bone mineral density || id:ieu-a-982	leucine	Inverse variance weighted	8	0.373775	0.0719977	2.08616e-07	5.19149	Lumbar spine bone mineral density
071Guo	ieu-a-12	Crohn's disease || id:ieu-a-12	tyrosine	Wald ratio	1	-1.98233	0.381888	2.09322e-07	-5.19086	Crohn's disease
hfQrfn	ukb-b-15003	Diagnoses - main ICD10: L72.0 Epidermal cyst || id:ukb-b-15003	pc ae c38:2	Inverse variance weighted	8	-0.00168872	0.00032545	2.11556e-07	-5.18889	Diagnoses - main ICD10: L72.0 Epidermal cyst
QyXifh	ieu-a-965	Lung adenocarcinoma || id:ieu-a-965	1-stearoyl-2-linoleoyl-gpc (18:0/18:2)*	Inverse variance weighted	3	-1.01322	0.195281	2.11962e-07	-5.18853	Lung adenocarcinoma
ZTszCZ	ieu-a-965	Lung adenocarcinoma || id:ieu-a-965	1-palmitoyl-2-linoleoyl-gpc (16:0/18:2)	Inverse variance weighted	3	-0.961961	0.185401	2.11962e-07	-5.18853	Lung adenocarcinoma
iRMbTB	ieu-a-965	Lung adenocarcinoma || id:ieu-a-965	1-stearoyl-2-linoleoyl-gpi (18:0/18:2)	Inverse variance weighted	3	-0.63913	0.123181	2.11962e-07	-5.18853	Lung adenocarcinoma
bl5GIW	ieu-a-996	Eczema || id:ieu-a-996	1-palmitoyl-2-eicosapentaenoyl-gpc (16:0/20:5)	Inverse variance weighted	3	-0.23482	0.0452606	2.12363e-07	-5.18818	Eczema
Bm6jSv	ieu-a-996	Eczema || id:ieu-a-996	1-dihomo-linolenoyl-gpe (20:3n3 or 6)	Inverse variance weighted	3	0.181294	0.0349436	2.12363e-07	5.18818	Eczema
IUlYa2	ieu-a-996	Eczema || id:ieu-a-996	1-eicosapentaenoyl-gpc (20:5)	Inverse variance weighted	3	-0.229767	0.0442866	2.12363e-07	-5.18818	Eczema
gNkfMs	ukb-a-367	Happiness || id:ukb-a-367	sm c24:1	Inverse variance weighted	7	-0.0933744	0.0180029	2.14115e-07	-5.18665	Happiness
UiK57V	ukb-b-3965	Diagnoses - main ICD10: G56.0 Carpal tunnel syndrome || id:ukb-b-3965	lysine	Inverse variance weighted	9	-0.00410834	0.000792113	2.1422e-07	-5.18655	Diagnoses - main ICD10: G56.0 Carpal tunnel syndrome
wDMryM	ieu-a-1048	Thalamus volume || id:ieu-a-1048	nisinate (24:6n3)	Inverse variance weighted	4	108.76	20.9723	2.15017e-07	5.18586	Thalamus volume
PwKKlE	ukb-a-248	Body mass index (BMI) || id:ukb-a-248	pc aa c38:3	Inverse variance weighted	11	0.031852	0.00614248	2.15397e-07	5.18553	Body mass index (BMI)
BvDTkS	ieu-a-89	Height || id:ieu-a-89	x-11593--o-methylascorbate*	Inverse variance weighted	2	-0.22449	0.0432923	2.15494e-07	-5.18545	Height
uHuuLR	ieu-a-89	Height || id:ieu-a-89	2-o-methylascorbic acid	Inverse variance weighted	2	-0.0249302	0.00480772	2.15494e-07	-5.18545	Height
hfQrfn	ieu-a-1110	Large vessel disease || id:ieu-a-1110	pc ae c38:2	Inverse variance weighted	8	-0.450014	0.0868446	2.19715e-07	-5.18183	Large vessel disease
PapeuL	ukb-a-25	Alcohol intake frequency. || id:ukb-a-25	sm c18:0	Inverse variance weighted	18	-0.0729547	0.0140955	2.27017e-07	-5.17573	Alcohol intake frequency.
7byy5c	ieu-a-1042	Nucleus accumbens volume || id:ieu-a-1042	isobutyrylcarnitine (c4)	Inverse variance weighted	6	-23.8992	4.6188	2.28721e-07	-5.17434	Nucleus accumbens volume
kv1XRO	ukb-b-18994	Miserableness || id:ukb-b-18994	1-dihomo-linoleoyl-gpc (20:2)	Inverse variance weighted	2	0.00916793	0.00177201	2.2946e-07	5.17374	Miserableness
hBsfNx	ukb-b-6519	Worrier / anxious feelings || id:ukb-b-6519	4-androsten-3alpha,17alpha-diol monosulfate (3)	Inverse variance weighted	2	-0.00852974	0.00164869	2.2958e-07	-5.17364	Worrier / anxious feelings
QMv5JG	ukb-a-248	Body mass index (BMI) || id:ukb-a-248	1-(1-enyl-palmitoyl)-gpc (p-16:0)*	Inverse variance weighted	5	0.0474609	0.00918729	2.39245e-07	5.16593	Body mass index (BMI)
2ccX6r	ukb-b-20464	Doctor diagnosed COPD (chronic obstructive pulmonary disease) || id:ukb-b-20464	x-24241	Inverse variance weighted	6	-0.00330708	0.00064024	2.39963e-07	-5.16537	Doctor diagnosed COPD (chronic obstructive pulmonary disease)
Pan0Io	ieu-a-7	Coronary heart disease || id:ieu-a-7	x-11538	Inverse variance weighted	4	-0.0528951	0.0102405	2.40081e-07	-5.16528	Coronary heart disease
LX5R3P	ukb-b-14814	Diagnoses - main ICD10: K30 Dyspepsia || id:ukb-b-14814	n2-acetyl,n6,n6-dimethyllysine	Inverse variance weighted	10	0.000530329	0.000102676	2.40331e-07	5.16508	Diagnoses - main ICD10: K30 Dyspepsia
t27zLw	ukb-b-1968	Diagnoses - main ICD10: K63.5 Polyp of colon || id:ukb-b-1968	n-acetyl-isoputreanine	Inverse variance weighted	5	0.00171815	0.000332649	2.40382e-07	5.16504	Diagnoses - main ICD10: K63.5 Polyp of colon
oLOab5	ieu-a-1097	Microalbuminuria || id:ieu-a-1097	glycosyl ceramide (d18:1/20:0, d16:1/22:0)*	Inverse variance weighted	7	-0.350889	0.0679638	2.43189e-07	-5.16287	Microalbuminuria
wkLuzs	ukb-b-10555	Diagnoses - secondary ICD10: I50.1 Left ventricular failure || id:ukb-b-10555	behenoyl dihydrosphingomyelin (d18:0/22:0)*	Inverse variance weighted	5	0.00275786	0.000534176	2.43246e-07	5.16283	Diagnoses - secondary ICD10: I50.1 Left ventricular failure
SHWPeL	ieu-a-1050	Ferritin || id:ieu-a-1050	isoleucine	Inverse variance weighted	5	0.50383	0.097588	2.43252e-07	5.16282	Ferritin
l5hheq	ieu-a-1041	Intracranial volume || id:ieu-a-1041	pc ae c36:2	Inverse variance weighted	8	28561.1	5532.59	2.43874e-07	5.16235	Intracranial volume
boBryA	ieu-a-1052	Transferrin || id:ieu-a-1052	tiglylcarnitine (c5:1-dc)	Inverse variance weighted	3	0.246134	0.0476801	2.44077e-07	5.16219	Transferrin
geM63W	ukb-a-248	Body mass index (BMI) || id:ukb-a-248	7-methylxanthine	Wald ratio	1	0.125433	0.0243031	2.45406e-07	5.16117	Body mass index (BMI)
FYvImn	ukb-b-8476	Loneliness, isolation || id:ukb-b-8476	serine	Inverse variance weighted	5	0.0255099	0.00494308	2.45979e-07	5.16074	Loneliness, isolation
boBryA	ieu-a-1050	Ferritin || id:ieu-a-1050	tiglylcarnitine (c5:1-dc)	Inverse variance weighted	3	-0.226702	0.0439405	2.47874e-07	-5.1593	Ferritin
BqPVj4	ieu-a-1008	Platelet count || id:ieu-a-1008	sphingomyelin (d18:2/14:0, d18:1/14:1)*	Wald ratio	1	-22.6868	4.39804	2.49075e-07	-5.1584	Platelet count
1Sbv9B	ieu-a-117	Neo-openness to experience || id:ieu-a-117	pc aa c32:0	Inverse variance weighted	3	3.47034	0.67276	2.49119e-07	5.15836	Neo-openness to experience
UvZFy9	ukb-a-249	Weight || id:ukb-a-249	4-hydroxyphenylacetoylcarnitine	Inverse variance weighted	3	-0.0549519	0.0106538	2.4963e-07	-5.15798	Weight
Yo3dgC	ieu-a-1112	Primary sclerosing cholangitis || id:ieu-a-1112	3-methoxytyrosine	Inverse variance weighted	4	0.549149	0.106481	2.50592e-07	5.15726	Primary sclerosing cholangitis
6l7DTh	ukb-b-5018	Diagnoses - main ICD10: K61.0 Anal abscess || id:ukb-b-5018	sm c16:0	Inverse variance weighted	4	0.00271444	0.000526522	2.53059e-07	5.15542	Diagnoses - main ICD10: K61.0 Anal abscess
S26sfX	ukb-b-5018	Diagnoses - main ICD10: K61.0 Anal abscess || id:ukb-b-5018	1-oleoyl-2-eicosapentaenoyl-gpc (18:1/20:5)	Inverse variance weighted	4	0.000997257	0.000193438	2.53059e-07	5.15542	Diagnoses - main ICD10: K61.0 Anal abscess
GymZxp	ieu-a-275	Red blood cell count || id:ieu-a-275	3-hydroxybutyroylglycine**	Inverse variance weighted	6	0.0377754	0.00732746	2.53186e-07	5.15533	Red blood cell count
CUf70N	ieu-a-1102	Chronic kidney disease || id:ieu-a-1102	2-ketocaprylate	Inverse variance weighted	3	0.232293	0.0450779	2.56136e-07	5.15316	Chronic kidney disease
mdCCE4	ukb-b-10093	Tense / 'highly strung' || id:ukb-b-10093	1-palmitoyl-2-dihomo-linolenoyl-gpc (16:0/20:3n3 or 6)*	Inverse variance weighted	2	-0.0190183	0.00369081	2.5653e-07	-5.15287	Tense / 'highly strung'
dVokOy	ieu-a-1005	Percent emphysema || id:ieu-a-1005	n-acetylcitrulline	Inverse variance weighted	5	-0.0261956	0.00508388	2.56792e-07	-5.15268	Percent emphysema
hd47cc	ieu-a-1005	Percent emphysema || id:ieu-a-1005	n-acetylornithine	Inverse variance weighted	5	0.031335	0.0060813	2.56792e-07	5.15268	Percent emphysema
